# Supplementary material for: Using competing risk and multistate model to estimate the impact of nosocomial infection on length of stay and mortality in burn patients in Southeast China
Source: PubMed Central journal article supplement — BMJ Open. 2018 Dec 2;8(11):bmjopen-2017-020527. doi: 10.1136/bmjopen-2017-020527 (PMC6278804; doi:10.1136/bmjopen-2017-020527), 2018-12-02
Supplement: bmjopen-2017-020527.draft_revisions.pdf [file bmjopen-2017-020527.draft_revisions.pdf]

# BMJ Open

BMJ Open is committed to open peer review. As part of this commitment we make the peer review history of every article we publish publicly available.

When an article is published we post the peer reviewers' comments and the authors' responses online. We also post the versions of the paper that were used during peer review. These are the versions that the peer review comments apply to.

The versions of the paper that follow are the versions that were submitted during the peer review process. They are not the versions of record or the final published versions. They should not be cited or distributed as the published version of this manuscript.

BMJ Open is an open access journal and the full, final, typeset and author-corrected version of record of the manuscript is available on our site with no access controls, subscription charges or pay-per-view fees (<http://bmjopen.bmj.com>).

If you have any questions on BMJ Open's open peer review process please email [info.bmjopen@bmj.com](mailto:info.bmjopen@bmj.com)

# BMJ Open

## Using multistate model to estimate the impact of nosocomial infection on outcomes in burn patients in Southeast China

|                                 |                                                                                                                                                                                                                                                                            |
|---------------------------------|----------------------------------------------------------------------------------------------------------------------------------------------------------------------------------------------------------------------------------------------------------------------------|
| Journal:                        | <i>BMJ Open</i>                                                                                                                                                                                                                                                            |
| Manuscript ID                   | bmjopen-2017-020527                                                                                                                                                                                                                                                        |
| Article Type:                   | Research                                                                                                                                                                                                                                                                   |
| Date Submitted by the Author:   | 13-Nov-2017                                                                                                                                                                                                                                                                |
| Complete List of Authors:       | GUO, Hai-lei; Department of Burns Surgery<br>ZHAO, Guang-ju; Emergency Department<br>LING, Xiang-wei ; Department of Burns Surgery<br>XU, Jian-jun; Department of Burns Surgery<br>LU, Cai-jiao; Department of Burns Surgery<br>LIU, zhengjun; Department of Burns Surgery |
| <b>Primary Subject Heading</b>: | Infectious diseases                                                                                                                                                                                                                                                        |
| Secondary Subject Heading:      | Epidemiology                                                                                                                                                                                                                                                               |
| Keywords:                       | burn, nosocomial infection, length of stay, mortality, multi-state model                                                                                                                                                                                                   |
|                                 |                                                                                                                                                                                                                                                                            |

SCHOLARONE™  
Manuscripts

1  
2  
3 **Using multistate model to estimate the impact of nosocomial infection on**  
4  
5 **outcomes in burn patients in Southeast China**

6 Hai-lei GUO<sup>1</sup>, Guang-ju ZHAO<sup>2</sup>, Xiang-wei LING<sup>1</sup>, Jian-jun XU<sup>1</sup>, Cai-jiao LU<sup>1\*</sup>,  
7  
8 Zheng-jun LIU<sup>1\*</sup>  
9

10  
11  
12 <sup>1</sup>Department of Burns Surgery, The First Affiliated Hospital of Wenzhou Medical  
13 University, Wenzhou 325000, China

14  
15  
16 <sup>2</sup> Emergency Department, The First Affiliated Hospital of Wenzhou Medical  
17 University, Wenzhou 325000, China  
18  
19  
20  
21  
22  
23  
24  
25  
26  
27  
28  
29  
30  
31  
32  
33  
34  
35  
36  
37  
38  
39  
40  
41  
42  
43  
44

45  
46  
47 **\* Corresponding authors:** Zheng-jun LIU, Department of Burns Surgery, The First  
48 Affiliated Hospital of Wenzhou Medical University, Wenzhou 325000, China; Tel:  
49 (+86) 577 55579432; E-mail: zhengjun1227@aliyun.com; Cai-jiao LU, Department  
50 of Burns Surgery, The First Affiliated Hospital of Wenzhou Medical University,  
51 Wenzhou 325000, China; Tel: (+86) 577 :55579433; E-mail: lucaijiao139@163.com  
52  
53  
54  
55  
56  
57  
58  
59  
60

**Abstract:**

**Objective:** Due to the defects in skin barrier function and immune response, burn patients who survive the acute phase of a burn injury are at a high risk of nosocomial infection (NI). The aim of this study was to evaluate the impacts of NI on outcomes in burn patients using a multistate model. **Design and Setting:** A retrospective observational study was conducted in burn unit and intensive care unit (ICU) in the First Affiliated Hospital of Wenzhou Medical University, Wenzhou, China. **Participants:** Data were obtained from 1143 records of patients admitted with burn between 1 January 2013 to 31 December 2016. **Methods:** Risk factors for NIs were determined by binary logistic regression. The extended Cox model with time-varying covariates was used to determine the impact of NIs on mortality, and Cumulative incidence functions (CIF) were calculated. Multiple-linear regression analysis was applied to detect the variables associated with LOS. Using a multi-state model, the extra LOS due to NI were determined. **Results:** 15.8 percent of total burn patients were suffered from NIs and incidence density of NIs was 9.6 per 1000 patient-days. NIs significantly increased the rate of death (hazard ratio: 4.49, CI<sub>95</sub> 2.309~8.722, P<0.001), and the cumulative probability of death for a patient with NI was greater than that for a patient who remained free of NI after around day 7. The expected extra LOS due to NIs was 12.9 days (CI<sub>95</sub> 6.8~19.0). **Conclusions:** Using appropriate statistical methods, the present study provided the further information about the impact of NIs on LOS and mortality in burn patients. Considering the consequences of NIs, surveillance and prevention are required to reduce the incidence of NIs, and then improve the outcomes of burns.

**Key words:** burn, nosocomial infection, length of stay, mortality, multi-state model

### Strengths and limitations of this study

1. Nosocomial infection was associated with the increased cumulative incidence of burn death.
2. The expected extra Length of stay due to nosocomial infections among burn patients was 14.6 days.
3. The present study was performed in a single center and the results need to be further confirmed by multiple center trials
4. Multi-state and competing risks analysis can be used to estimate the impact of nosocomial infections in burn patients.

## Introduction

Burn injury, as a common cause of morbidity and mortality, has been recognized as a global public health problem. According to the data from WHO, burns account for an estimated 300,000 deaths each year [1]. Previous evidence illustrated that burn shock and inhalation injury were the major cause of early death among patients with burn injury [2,3]. Due to the advance in fluid resuscitation, surgical approach, organ function protection, antibiotic innovation and other adjunct strategies, the early mortality of burn patients decreased dramatically over the last 30 years [4,5]. On the other hand, because of the defects in skin barrier function and immune response, burn patients who survive the acute phase of a burn injury are at a high risk of acquiring nosocomial infection (NI) [6].

It has been reported that 30% to 80% of burn patients were suffered from NIs [7-9]. Nevertheless, the exact impact of NIs on the outcomes of burn patients remains elusive. A few studies reported the association between NIs and higher mortality after burn injury [7-9]. It should be noted that infection only can impact on LOS and outcomes after it has started [10,11]. So, appropriate statistical methods for estimating the risk of death and LOS due to NI among burn patients would be helpful in making medical decisions and developing policy. In the present study, using a multistate model, the impacts of NI on outcomes and LOS were determined among 1143 patients with burn.

## Materials and methods

### 1. Patients

A retrospective study was conducted in burn unit and intensive care unit (ICU) in the First Affiliated Hospital of Wenzhou Medical University, Wenzhou, China. The

1  
2  
3 burn unit has 72 beds and there are 50 beds in the ICU. After approval by the  
4 Institutional Review Board of the First Affiliated Hospital of Wenzhou Medical  
5 University, data of total 1143 patients admitted with burn were collected during  
6 January 2013 to December 2016. Exclusion criteria were as follows: (1)  $LOS \leq 48$   
7 hours; (2) admission to the hospital later than 3 days post burn. 157 burn patients were  
8 ineligible by exclusion criteria, and 986 patients were enrolled in the study. As the  
9 present study was an observational and retrospective study, informed consent was  
10 waived by the Medical Ethics Committee.  
11  
12  
13  
14  
15  
16  
17

## 18 **2. Management**

19  
20 Burn patients with acute respiratory failure or shock were admitted to the ICU,  
21 and they were transferred to the Burn Unit when the tracheal tube is removed or the  
22 hemodynamic situation of them becomes stable, according to the judgments of burn  
23 surgeon and ICU doctor. Patients without shock or acute respiratory failure were  
24 admitted to Burn Unit. Resuscitation were performed according to the modified Evans  
25 (Ruijin) formula as described by previous paper [12,13]. Dressings were changed  
26 every 1-3 days by doctors. Silver sulfadiazine were applied on deep partial-thickness  
27 and full-thickness burns. For full-thickness burns, early surgical excision of burn  
28 eschar and biological closure were performed when the patients' condition permits.  
29 Prophylactic antibiotic therapy was performed in patients with TBSA>30% or  
30 inhalation injury. In addition, patients with clinically suspected or confirmed infection  
31 were treated with antibiotics and adjusted according to the results of isolate's  
32 susceptibility.  
33  
34  
35  
36  
37  
38  
39  
40  
41  
42  
43

## 44 **3. Definitions and data collection**

45 Patients with a history of smoke or fire exposure in a closed space or  
46 maxillofacial burn were suspected to have inhalation injury. The diagnosis was  
47 confirmed by physical findings including changes in voice and carbonaceous sputum  
48 production or by fiberoptic bronchoscopy [14].  
49  
50  
51

52 NI in burn patients was defined as infection occurring 48 hours after hospital  
53 admission. There were four main types of NIs (burn wound infection, bloodstream  
54  
55  
56

1  
2  
3 infection, pneumonia, urinary tract infection) according to the criteria of the Centers  
4 for Disease Control and Prevention (CDC, 2008) [15].

5  
6  
7 The characteristics of NI including time, site and pathogen were recorded. For  
8 patients with NI at the same site, only the first episode of it was analyzed.  
9  
10 Additionally, the following data were collected: gender, age, history of diabetes, date  
11 of admission, burn types (flame, scalding, electric and others), burn size and depth,  
12 inhalation injury as well as dates of discharge and death.  
13  
14  
15

#### 16 **4. Statistical Analysis**

17  
18 Data are presented as a percentage of a percentage of total or interquartile ranges  
19 (25<sup>th</sup> and 75<sup>th</sup> percentiles), as appropriate. Mann-Whitney U test is used to analysis  
20 continuous variables while categorical variables were analyzed by the Chi-square test.  
21  
22 Univariate analysis was performed to assess the potential variables associated with NI  
23 and mortality. The variables with p-value less than 0.05 were used for further analysis.  
24  
25 The strength of a link between two variables was determined by Spearman's Rank  
26 Correlation Coefficient. If the high correlations (>0.4) between two variables was  
27 observed, one of them would be removed. Multivariate binary logistic regression  
28 analyses and Cox model were used to determine the risk factors for NI and death,  
29 respectively. In Cox model, NI was modeled as a time-varying covariate by the  
30 'survival' package in R. Cumulative incidence functions were calculated by the  
31 "cmprsk" package. Additionally, linear regression analysis was applied to detect the  
32 variables associated with hospital LOS. The 'etm' package in R was performed to  
33 calculate the difference in length of stay between patients with and without NI. There  
34 are four states in our multistate model: admission, NI, discharge alive and death. The  
35 detail information about this multistate model were shown in Figure 1.  
36  
37  
38  
39  
40  
41  
42  
43  
44  
45  
46

47 R 3.4.1 software and SPSS 18.0 were used to prepare and analysis the data.  
48 Statistical significance was expressed as both p values and 95% confidence intervals  
49 (CI<sub>95</sub>). A two-sided p-value <0.05 was considered statistically significant.  
50  
51  
52  
53

#### 54 **Results:**



## 1. Patient characteristics

During the study period, a total of 1143 burn patients were admitted to the hospital, and 986 patients who met the criteria were included in the final analysis. Demographic and burn-related characteristics are shown in Table 1. 65.1 percent of the patients were men and 34.9% were women. The median age was 37 (interquartile range [IQR], 18-49) years and 7.1% were elderly patients (65 years and older). 47.6% of the patients had < 10% TBSA burn, 30.8% had 10-29% TBSA burn, and 21.6% of burn patients with TBSA more than 30%. The main burn type is flame (78.2%), followed by scalding (9.7%), electric (7.4%) and other types (4.7%). There were 46 (4.7%) patients had inhalation injury. The hospital mortality was 5.5% (54/986) and the median length of hospital stay was 14 (IQR 8-28).

## 2. Characteristics of NIs

156 burn patients had 209 NIs, and the median time from admission to the NI was 7 days (IQR 5-10). Over all NI rate was 9.6 per 1000 patient-days. Among all NIs, burn wound infection (BWI) was the most frequent infection (45.9%), followed by blood stream infection (BSI) (24.8%), pneumonia (23.4%) and urinary tract infection (UTI) (5.7%) (Fig.2A). As shown in Fig.2B, a total 237 microorganisms were isolated. The most common pathogens was *Acinetobacter baumannii* (30.8%), followed by *Pseudomonas aeruginosa* (21.5%), *klebsiella pneumoniae* (16.9%) and *Staphylococcus spp* (11%) (Fig.2B).

Univariate analysis indicated that there were significant differences in age, the percentage of patients more than 65 years old, diabetes, TBSA<10%, TBSA>50%, full thickness burn, inhalation injury and LOS between patients with and without Nis (Table 1). In multiple logistic regression, there was a statistically significant increased odds ratio for NI in patients with diabetes (odds ratio [OR] 1.745; 95% confidence interval [CI<sub>95</sub>] 1.476~1.745, p<0.001) and a longer LOS in the hospital (OR 1.023; CI<sub>95</sub> 1.022~1.024, p<0.001), burn injuries more than 50% TBSA (OR 2.569; CI<sub>95</sub> 2.312~2.856, p<0.001), full thickness burn (OR 2.124; CI<sub>95</sub> 2.312~2.856, p<0.001),

1  
2  
3 and inhalation injury (OR 8.051; CI<sub>95</sub> 6.993~9.268, p<0.001) (Table 2).  
4

### 5 **3. Impact of NIs on hospital death of burn patients**

6  
7 As shown in Table 1, the hospital mortality of patients with and without NI were  
8 16.0% and 3.5%, respectively. Univariate analysis indicated that the mortality of  
9 patients with NI, TBSA more than 30%, full thickness burn, and inhalation injury  
10 were higher than patients without (Table S1). Additionally, the mortality of patients  
11 with TBSA less than 10% was lower than patients with burn injuries more than 10%.  
12 Using a Cox regression model with NI modeled as a time-varying covariate, we found  
13 the risk of hospital death for patients with NI was 4.49 times higher than that for  
14 patients without it (hazard ratio:4.49, CI<sub>95</sub> 2.309~8.722, P<0.001) (Table 2). Death  
15 was rarer in burn patients with TBSA<10%, while patients with inhalation injury were  
16 more likely to die. Cumulative incidence functions for death were shown in Fig 3A.  
17 The cumulative probability of discharge was consistently lesser for an infected patient  
18 (left panel). As shown in Fig 3B, the cumulative probability of death for a patient with  
19 NI was greater than for a patient who remained free of NI after around day 7 (right  
20 panel).  
21  
22  
23  
24  
25  
26  
27  
28  
29  
30  
31

### 32 **4. Extra length of stay**

33  
34 As shown in Fig.1, the median LOS for patients without NI was 13 days (IQR  
35 7-24). For patients with NI, the median LOS was 27 days (IQR 13.25-57.75). Because  
36 the LOS distribution is positively skewed, the logarithm (base 10) of LOS was used as  
37 the response variable in multiple linear regressions. Based on the results of multiple  
38 linear regressions, variables associated with LOS were inhalation injury,  
39 TBSA30-50%, TBSA>50%, electric burn, flame burn, full thickness burn as well as  
40 NI (Table 3). Using a multi-state model, the expected extra length of stay due to NI  
41 was 12.9 days [CI<sub>95</sub> 6.8~19.0, standard error (SE): 3.11, P<0.001] (Fig. 4).  
42  
43  
44  
45  
46  
47  
48  
49  
50

### 51 **Discussion:**

52  
53 Burn patients, especially those with severe burns, are at high risk for local and  
54 systemic infections. Although infection control program has been performed in most  
55  
56

1  
2  
3 burn centers and hospitals, the incidence of NI remain high until now. Alp E et al.  
4 reported 11 percent of total burn patients were suffered from NI and incidence density  
5 was 14.7 per 1000 patient days [10]. In patients who have > 20% TBSA burn and  
6 need for surgical intervention, the incidence of NI was 70% [16]. In the present study,  
7 incidence density of NI was 9.6 per 1000 patient days which was less than the rate  
8 reported by Alp E et al. and Jeschke MG et al. BWIs was the most common infections  
9 in our burn center. *A. baumannii* and *P. aeruginosa* accounted for about 50% of total  
10 isolates, and *A. baumannii* was the predominant pathogen. Previously study illustrated  
11 that *A. baumannii* was the most common Gram-negative pathogen isolated from burn  
12 patients [9]. According to the data published by Alp E et al [10], 57% of isolates from  
13 burns was *A. baumannii* in 2009. As *A. baumannii* is increasingly implicated as a  
14 main cause of NI, more strict measures have been taken to reduce the incidence of *A.*  
15 *baumannii* infection, especially in Asian countries [17].

16  
17  
18  
19  
20  
21  
22  
23  
24  
25  
26  
27  
28  
29  
30  
31  
32  
33  
34  
35  
36  
37  
38  
39  
40  
41  
42  
43  
44  
45  
46  
47  
48  
49  
50  
51  
52  
53  
54  
55  
56  
57  
58  
59  
60  
Many factors are associated with the incidence of NI in burns, including burn  
injury induced immunosuppression [6, 8-10]. Clinical and experimental evidence  
illustrated that severe systemic inflammation after burn injuries can result in a  
compensatory down-regulation of immune responses, which is characterized by  
decreased number of T helper lymphocytes, increased suppressive activity of Foxp3<sup>+</sup>T  
cells as well as elevated levels of anti-inflammatory cytokines[18-20]. The immune  
response declines in efficiency with age, and increased susceptibility to infection was  
also observed by previous studies [21,22]. The present study showed that burn  
patients older than 65 years were more susceptible to NI. Similar to the previous  
reports, TBSA, Full thickness burn, inhalation injury and LOS were observed to be  
associated with NI [8-10].

Burn size was a main negative risk factor for death [16, 23-24]. The lower death  
rate of patients with TBSA<10% was observed in the present study which was consist  
with the results of other studies [23-24]. Inhalation injury usually cause pulmonary  
and systemic complications which greatly increases the risk of death after burn and  
the results of our study confirmed this [23-24]. It has been reported that, in patients

1  
2  
3 with more than 40% TBSA, over 70% of all deaths were related to sepsis resulting  
4 from BWIs and other infection complications [6,8-10,25]. In a study of 11,793 burn  
5 patients, the mortality in the BSI group was higher than the control group (21.9% vs  
6 4.2%, OR=6.041) [26]. In the present study, NI was modeled as a time-varying factor  
7 in a competing risk model, we found the risk of hospital death for burns with NI was  
8 4.49 times higher than that for patients without it, and the cumulative probability of  
9 discharge was consistently lesser for an infected patient. So, effective NI prevention  
10 and control measures may help to improve survival in burn patients.

11  
12  
13  
14  
15  
16  
17  
18 The association between NI and LOS has been illustrated by many studies. The  
19 median LOS was about 2-fold higher in trauma patients with NI compared with  
20 patients without infection [27]. Among patients with critical illness, NI increased the  
21 LOS by approximately 18 days per patients [28]. NI after burn has been considered as  
22 a risk factor for prolonged LOS, although clinical data are still lacking. Shupp JW et  
23 al. reported that BSI was associated with longer hospital LOS in burn patients [26].  
24 Nevertheless, NI can only impact LOS after it has started and the duration of  
25 hospitalization prior to the infection should be controlled. So, a multistate model was  
26 used in the present study to estimation of extra LOS caused by NI. We found that the  
27 expected extra length of stay due to NI in burn patients was 12.9 days.

28  
29  
30  
31  
32  
33  
34  
35  
36 There are some limitations in the present study. First, efforts used to prevent NI,  
37 such as antibiotic treatment and surgery, may have been started before the diagnosis  
38 was made. So, our assessment of the impact of NI on LOS and mortality should be  
39 regarded as a lower estimate. Second, as an observational and retrospective study,  
40 some potential factors, such as nursing protocols and the use of anti-peptic ulcer or  
41 immunosuppression drugs, that may be associated with NI and outcomes were not  
42 available. These factors need to be taken into consideration in the prospective studies.  
43 Additionally, the present study was performed in a single center and the results need  
44 to be further confirmed by multiple center trials. Nevertheless, the present study  
45 provided additional information about the impact of NI on LOS and mortality in burn  
46 patients. The model used in the present study may help to improve the accuracy of  
47  
48  
49  
50  
51  
52  
53  
54  
55  
56

1  
2  
3 estimates of outcomes due to NIs in burns.  
4  
5

6  
7 **Funding:**

8 This work was supported by grants from the National Natural Science Foundation  
9 (grant number 81401621) and Wenzhou Municipal Science and Technology Project  
10 (grant numbers Y2013010, 2015KYB239).  
11  
12  
13

14  
15  
16 **Conflict of interest:**

17 The authors declare that they have no competing interests  
18  
19

20  
21 **Authors' contributions**

22 HLG and ZJL wrote the protocol, participated in the data analysis, and contributed to  
23 writing this manuscript. GJZ, XWL, JJX and CJL collected the data. All authors have  
24 read and approved the final manuscript.  
25  
26  
27

28  
29  
30 **Ethics approval:** Institutional Review Board of the First Affiliated Hospital of  
31 Wenzhou Medical University.  
32  
33

34 **Provenance and peer review:** Not commissioned; externally peer reviewed.  
35  
36

37  
38 **Data sharing statement:** No additional data are available.  
39  
40  
41  
42

43 **References:**

- 44  
45  
46  
47 1. Mock C, Peck M, Peden M, Krug E, Eds . A WHO plan for burn prevention and  
48 care. Geneva: World Health Organisation; 2008.  
49  
50 2. Bloemsma GC, Dokter J, Boxma H, Oen IM. Mortality and causes of death in a  
51 burn centre. *Burns* 2008; 34:1103-7.  
52  
53 3. Ryan CM, Schoenfeld DA, Thorpe WP, Sheridan RL, Cassem EH, Tompkins RG.  
54  
55  
56

- 1  
2  
3 Objective estimates of the probability of death from burn injuries. *N Engl J Med* 1998;  
4 338:362-6.  
5  
6  
7 4. Tompkins RG. Survival from burns in the new millennium: 70 years' experience  
8 from a single institution. *Ann Surg* 2015; 261:263-8.  
9  
10 5. Tompkins RG, Liang MH, Lee AF, Kazis LE; Multi-Center Benchmarking Study  
11 Working Group. The American Burn Association/Shriners Hospitals for Children  
12 Burn Outcomes Program: a progress report at 15 years. *J Trauma Acute Care Surg*  
13 2012; 73:S173-8.  
14  
15 6. Church D, Elsayed S, Reid O, Winston B, Lindsay R. Burn wound infections. *Clin*  
16 *Microbiol Rev* 2006; 19:403-34.  
17  
18 7. Keen EF 3rd, Robinson BJ, Hospenthal DR, Aldous WK, Wolf SE, Chung KK, et al.  
19 Incidence and bacteriology of burn infections at a military burn center. *Burns* 2010;  
20 36:461-8.  
21  
22 8. Öncül O, Öksüz S, Acar A, ülkür E, Turhan V, Uygur F, et al. Nosocomial infection  
23 characteristics in a burn intensive care unit: analysis of an eleven-year active  
24 surveillance. *Burns* 2014; 40:835-41.  
25  
26 9. Leseva M, Arguirova M, Nashev D, Zamfirova E, Hadzhyiski O. Nosocomial  
27 infections in burn patients: etiology, antimicrobial resistance, means to control. *Ann*  
28 *Burns Fire Disasters* 2013; 26:5-11.  
29  
30 10. Alp E, Coruh A, Gunay GK, Yontar Y, Doganay M. Risk factors for nosocomial  
31 infection and mortality in burn patients: 10 years of experience at a university hospital.  
32 *J Burn Care Res* 2012; 33:379-85.  
33  
34 11. Albrecht MC, Griffith ME, Murray CK, Chung KK, Horvath EE, Ward JA, et al.  
35 Impact of *Acinetobacter* infection on the mortality of burn patients. *J Am Coll Surg*  
36 2006; 203:546-50.  
37  
38 12. Shi Y, Zhang X, Huang BG, Wang WK, Liu Y. Severe burn injury in late  
39 pregnancy: a case report and literature review. *Burns Trauma* 2015;3:2.  
40  
41 13. Chen Z, Yuan K. Another important factor affecting fluid requirement after severe  
42 burn: a retrospective study of 166 burn patients in Shanghai. *Burns*. 2011; 37:1145-9.  
43  
44  
45  
46  
47  
48  
49  
50  
51  
52  
53  
54  
55  
56  
57  
58  
59  
60

14. Walker PF, Buehner MF, Wood LA, Boyer NL, Driscoll IR, Lundy JB, et al. Diagnosis and management of inhalation injury: an updated review. *Crit Care* 2015; 19:351.
15. Horan TC, Andrus M, Dudeck MA. CDC/NHSN surveillance definition of health care-associated infection and criteria for specific types of infections in the acute care setting. *Am J Infect Control* 2008; 36:309-32.
16. Jeschke MG, Pinto R, Kraft R, Nathens AB, Finnerty CC, Gamelli RL, et al. Morbidity and survival probability in burn patients in modern burn care. *Crit Care Med* 2015; 43:808-15.
17. Chen B, He LX, Hu B, Ni YX, Qiu H, Shi Y, et al. Expert Consensus Document on *Acinetobacter baumannii* infection diagnosis, treatment and prevention in China. *Zhong Hua Yi Xue Za Zhi* 2012; 92:76–85.
18. Schwacha MG, Chaudry IH. The cellular basis of post-burn immunosuppression: macrophages and mediators. *Int J Mol Med* 2002; 10:239-43.
19. Parment K, Zetterberg A, Ernerudh J, Bakteman K, Steinwall I, Sjoberg F. Long-term immunosuppression in burned patients assessed by in vitro neutrophil oxidative burst (Phagoburst). *Burns* 2007; 33:865-71.
20. Huang LF, Yao YM, Dong N, Yu Y, He LX, Sheng ZY. Association between regulatory T cell activity and sepsis and outcome of severely burned patients: a prospective, observational study. *Crit Care* 2010; 14:R3.
21. Rani M, Schwacha MG. Aging and the pathogenic response to burn. *Aging Dis* 2012; 3:171-80.
22. Zhao GJ, Li D, Zhao Q, Song JX, Chen XR, Hong GL, Li MF, et al. Incidence, risk factors and impact on outcomes of secondary infection in patients with septic shock: an 8-year retrospective study. *Sci Rep* 2016; 6:38361.
23. Smith DL, Cairns BA, Ramadan F, Dalston JS, Fakhry SM, Rutledge R, et al. Effect of inhalation injury, burn size, and age on mortality: a study of 1447 consecutive burn patients. *J Trauma* 1994; 37:655-9.
24. Li H, Yao Z, Tan J, Zhou J, Li Y, Wu J, et al. Epidemiology and outcome analysis



1  
2  
3 of 6325 burn patients: a five-year retrospective study in a major burn center in  
4 Southwest China. *Sci Rep* 2017; 7:46066.

5  
6  
7 25. Fitzwater J, Purdue GF, Hunt JL, O'Keefe GE. The risk factors and time course of  
8 sepsis and organ dysfunction after burn trauma. *J Trauma* 2003; 54:959-66.

9  
10  
11 26. Shupp JW, Pavlovich AR, Jeng JC, Pezzullo JC, Oetgen WJ, Jaskille AD, et al.  
12 Epidemiology of bloodstream infections in burn-injured patients: a review of the  
13 national burn repository. *J Burn Care Res* 2010; 31:521-8.

14  
15  
16 27. Glance LG, Stone PW, Mukamel DB, Dick AW. Increases in mortality, length of  
17 stay, and cost associated with hospital-acquired infections in trauma patients. *Arch*  
18 *Surg* 2011; 146:794-801.

19  
20  
21 28. Chen YY, Chou YC, Chou P. Impact of nosocomial infection on cost of illness and  
22 length of stay in intensive care units. *Infect Control Hosp Epidemiol* 2005; 26:281-7.

## 23 24 25 26 27 28 29 **Figure legends**

30  
31  
32 **Figure.1 Multistate model.** Our model including four states: admission, nosocomial  
33 infection, discharge alive and death. After admission, patients may be infected or not,  
34 then they may be discharge alive or die.

35  
36  
37  
38  
39 **Figure.2 Characteristics of nosocomial infections.** BWI: Burn wound infection;  
40 BSI: blood stream infection; PI: pulmonary infection; UTI: urinary tract infection.

41  
42  
43  
44  
45  
46 **Figure.3 Cumulative incidence functions for discharge (A) and death (B) in burn**  
47 **patients.** read lines: nosocomial infection; black lines: no nosocomial infection.

48  
49  
50  
51 **Figure 4. Expected extra length of stay in patients without (red line) and with**  
52 **(black line) infection.** LOS: length of stay. NI: nosocomial infection



1  
2  
3  
4  
5  
6  
7  
8  
9  
10  
11  
12  
13  
14  
15  
16  
17  
18  
19  
20  
21  
22  
23  
24  
25  
26  
27  
28  
29  
30  
31  
32  
33  
34  
35  
36  
37  
38  
39  
40  
41  
42  
43  
44  
45  
46  
47  
48  
49  
50  
51  
52  
53  
54  
55  
56  
57  
58  
59  
60

For peer review only

**Table 1. Demographics and clinical characteristic of burn patients with and without nosocomial infection.**

| Variables                        | Total<br>n=986 | NI<br>n=156 | No-NI<br>n=830 | <i>P</i> value   |
|----------------------------------|----------------|-------------|----------------|------------------|
| Male, n(%)                       | 642 (65.1%)    | 105 (64.7%) | 537 (67.3%)    | 0.530            |
| Age (years), median (25th, 75th) | 37 (18,49)     | 37 (17,49)  | 37 (24,37)     | 0.470            |
| ≥65 years, n(%)                  | 70 (7.1%)      | 20 (12.8%)  | 50 (6.0%)      | <b>0.002</b>     |
| Diabetes, n (%)                  | 38 (3.9%)      | 11 (7.1%)   | 27 (3.3%)      | <b>0.024</b>     |
| TBSA, n (%)                      |                |             |                |                  |
| <10%                             | 469 (47.6%)    | 55 (35.3%)  | 414 (49.9%)    | <b>0.031</b>     |
| 10-29%                           | 304 (30.8%)    | 38 (24.4%)  | 266 (32.0%)    | 0.056            |
| 30-50%                           | 143 (14.5%)    | 23 (14.7%)  | 120 (14.5%)    | 0.926            |
| >50%                             | 70 (7.1%)      | 40 (25.6%)  | 30 (3.6%)      | <b>&lt;0.001</b> |
| Full thickness burn, n (%)       | 221 (22.4%)    | 60 (38.5%)  | 161 (19.4%)    | <b>&lt;0.001</b> |
| Inhalation injury, n (%)         | 46 (4.7%)      | 38 (24.3%)  | 8 (1.0%)       | <b>&lt;0.001</b> |
| Burn type, n (%)                 |                |             |                |                  |
| flame                            | 771 (78.2%)    | 118 (75.6%) | 653 (84.7%)    | 0.4              |
| scalding                         | 96 (9.7%)      | 11 (7.1%)   | 85 (10.2%)     | 0.218            |
| electric                         | 73 (7.4%)      | 15 (9.6%)   | 58 (7.0%)      | 0.25             |
| others                           | 46 (4.7%)      | 12 (7.7%)   | 34 (4.1%)      | 0.051            |

1  
2  
3  
4  
5  
6  
7  
8  
9  
10  
11  
12  
13  
14  
15  
16  
17  
18  
19  
20  
21  
22  
23  
24  
25  
26  
27  
28  
29  
30  
31  
32  
33  
34  
35  
36  
37  
38  
39  
40  
41  
42  
43  
44  
45  
46  
47

---

|                                     |            |                   |            |        |
|-------------------------------------|------------|-------------------|------------|--------|
| <b>Length of hospital stay</b>      |            |                   |            |        |
| median (25th, 75th)                 | 14 (8, 28) | 27 (13.25, 57.75) | 13 (7, 24) | <0.001 |
| <b>In-hospital mortality, n (%)</b> | 54 (5.5%)  | 25 16.0           | 29 3.5     | <0.001 |

---

NI: nosocomial infection; TBSA: total body surface area

For peer review only

**Table.2 Results of the Cox-proportional hazard analysis of nosocomial infection and hospital death**

| Outcomes | Variables            | HR    | CI <sub>95</sub> | P value |
|----------|----------------------|-------|------------------|---------|
| NI       | Age>65 years         | 1.906 | 1.185~3.067      | 0.008   |
|          | TBSA>50%             | 1.812 | 1.112~2.953      | 0.017   |
|          | Full thickness burn  | 1.897 | 1.355~2.657      | <0.001  |
|          | Inhalation injury    | 3.094 | 2.004~4.777      | <0.001  |
|          | Length of stay       | 1.006 | 1.001~1.010      | 0.019   |
| Death    | Nosocomial infection | 4.488 | 2.209~8.722      | <0.001  |
|          | TBSA<10%             | 0.191 | 0.070~0.519      | 0.001   |
|          | Inhalation injury    | 3.332 | 1.683~6.985      | <0.001  |

NI: nosocomial infection; TBSA: total body surface area; HR: hazard ratio; CI<sub>95</sub>: 95% confidence interval

**Table.3 Results of multiple linear regressions analysis of length of stay (days)**

| Variables            | B     | CI <sub>95</sub> | P value |
|----------------------|-------|------------------|---------|
| TBSA 30-50%          | 0.153 | 0.091~0.215      | <0.001  |
| TBSA >50%            | 0.259 | 0.170~0.347      | <0.001  |
| Full thickness burn  | 0.109 | 0.057~0.161      | <0.001  |
| Electric burn        | 0.204 | 0.107~0.302      | <0.001  |
| Flame burn           | 0.092 | 0.031~0.153      | <0.003  |
| Nosocomial infection | 0.218 | 0.155~0.280      | <0.001  |

TBSA: total body surface area; CI<sub>95</sub>: 95% confidence interval

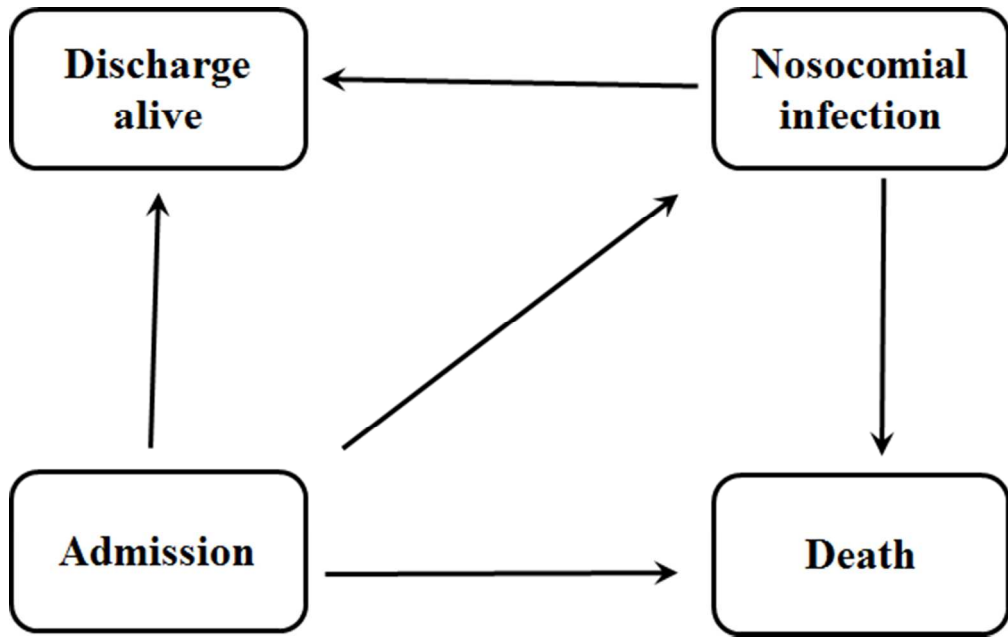

Figure.1 Multistate model.

220x138mm (300 x 300 DPI)

Review only

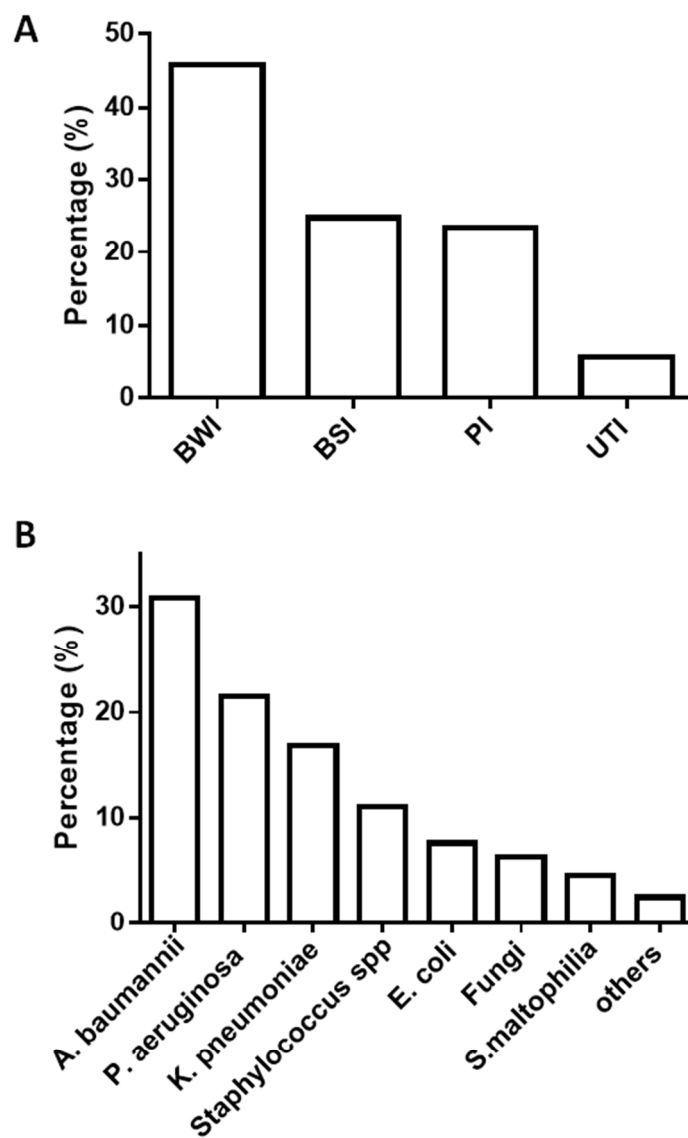

Figure.2 Characteristics of nosocomial infections.

195x322mm (300 x 300 DPI)

1  
2  
3  
4  
5  
6  
7  
8  
9  
10  
11  
12  
13  
14  
15  
16  
17  
18  
19  
20  
21  
22  
23  
24  
25  
26  
27  
28  
29  
30  
31  
32  
33  
34  
35  
36  
37  
38  
39  
40  
41  
42  
43  
44  
45  
46  
47  
48  
49  
50  
51  
52  
53  
54  
55  
56  
57  
58  
59  
60

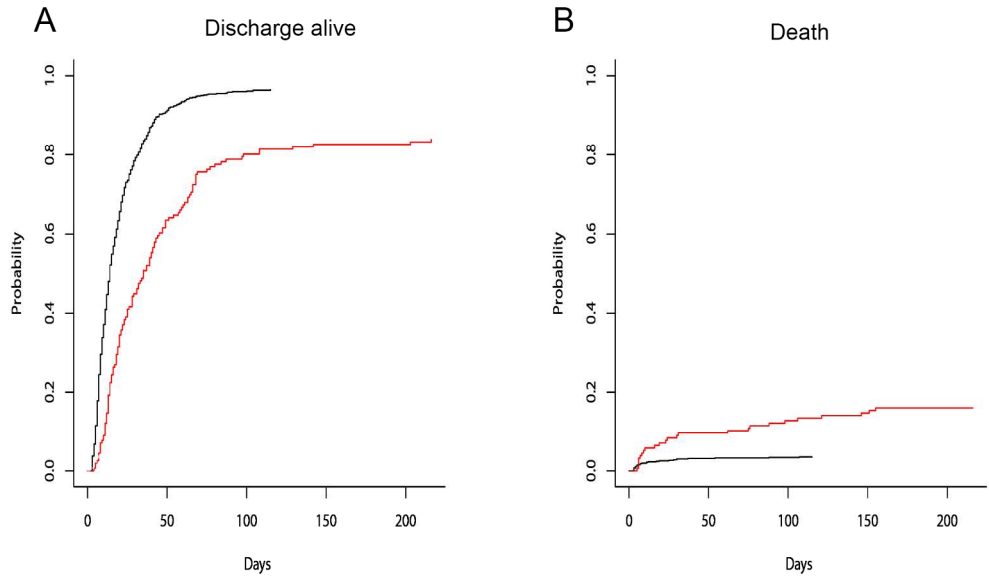

Figure.3 Cumulative incidence functions for discharge (A) and death (B) in burn patients.

190x127mm (300 x 300 DPI)

view only

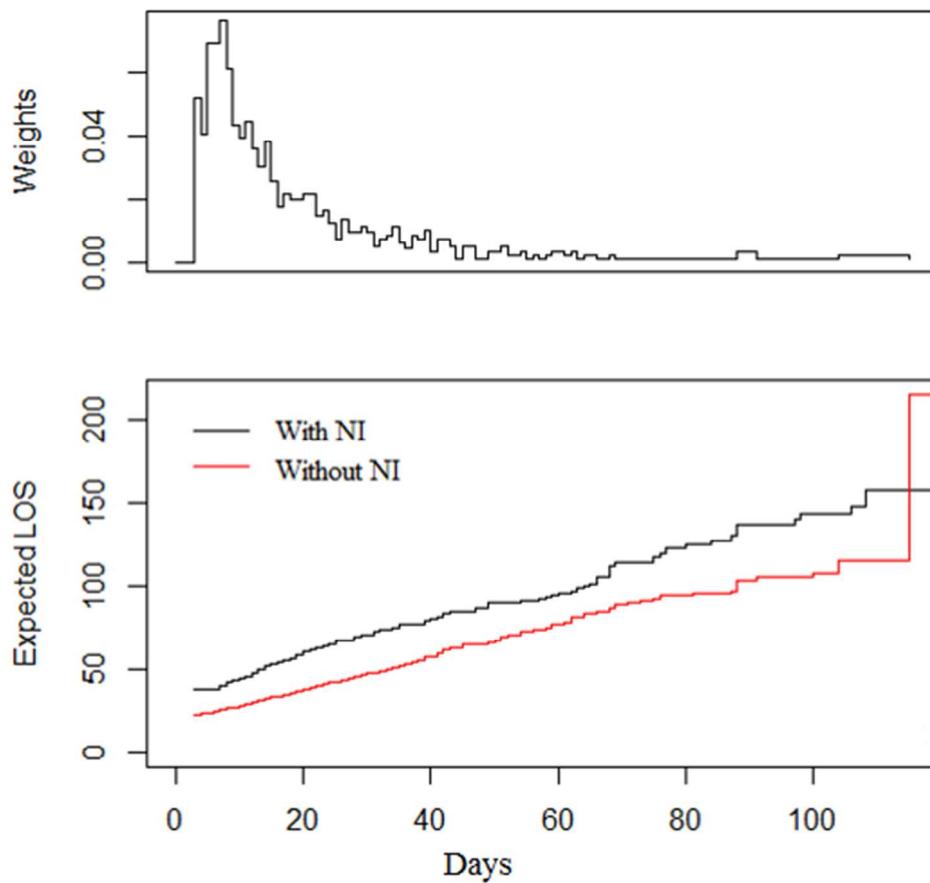

Figure 4. Expected extra length of stay in patients without (red line) and with (black line) infection.

275x275mm (300 x 300 DPI)

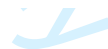



### The STROBE-Vet statement checklist.

| <b>Item</b>                     | <b>STROBE-Vet recommendation</b> | <b>Page #</b>                                                                                                                                |     |
|---------------------------------|----------------------------------|----------------------------------------------------------------------------------------------------------------------------------------------|-----|
| <b>Title and Abstract</b>       | 1                                | (a) Indicate that the study was an observational study and, if applicable, use a common study design term                                    | 2   |
|                                 |                                  | (b) Indicate why the study was conducted, the design, the results, the limitations, and the relevance of the findings                        | 2-3 |
| <b>Background / rationale</b>   | 2                                | Explain the scientific background and rationale for the investigation being reported                                                         | 4   |
| <b>Objectives</b>               | 3                                | (a) State specific objectives, including any primary or secondary prespecified hypotheses or their absence                                   | 4   |
|                                 |                                  | (b) Ensure that the level of organization <sup>a</sup> is clear for each objective and hypothesis                                            | 4   |
| <b>Study design</b>             | 4                                | Present key elements of study design early in the paper                                                                                      | 4-5 |
| <b>Setting</b>                  | 5                                | (a) Describe the setting, locations, and relevant dates, including periods of recruitment, exposure, follow-up, and data collection          | 4-5 |
|                                 |                                  | (b) If applicable, include information at each level of organization                                                                         |     |
| <b>Participants<sup>b</sup></b> | 6                                | (a) Describe the eligibility criteria for the owners/managers and for the animals, at each relevant level of organization                    | 5   |
|                                 |                                  | (b) Describe the sources and methods of selection for the owners/managers and for the animals, at each relevant level of organization        | 5   |
|                                 |                                  | (c) Describe the method of follow-up                                                                                                         |     |
|                                 |                                  | (d) For matched studies, describe matching criteria and the number of matched individuals per subject (e.g., number of controls per case)    |     |
| <b>Variables</b>                | 7                                | (a) Clearly define all outcomes, exposures, predictors, potential confounders, and effect modifiers. If applicable, give diagnostic criteria | 5-6 |
|                                 |                                  | (b) Describe the level of organization at which each variable was measured                                                                   | 5-6 |
|                                 |                                  | (c) For hypothesis-driven studies, the putative causal-structure among variables should be described (a diagram is strongly encouraged)      |     |

|                                   |     |                                                                                                                                                                                                                                                                                                       |     |
|-----------------------------------|-----|-------------------------------------------------------------------------------------------------------------------------------------------------------------------------------------------------------------------------------------------------------------------------------------------------------|-----|
| <b>Data sources / measurement</b> | 8*  | (a) For each variable of interest, give sources of data and details of methods of assessment (measurement). If applicable, describe comparability of assessment methods among groups and over time                                                                                                    | 6   |
|                                   |     | (b) If a questionnaire was used to collect data, describe its development, validation, and administration                                                                                                                                                                                             |     |
|                                   |     | (c) Describe whether or not individuals involved in data collection were blinded, when applicable                                                                                                                                                                                                     |     |
|                                   |     | (d) Describe any efforts to assess the accuracy of the data (including methods used for “data cleaning” in primary research, or methods used for validating secondary data)                                                                                                                           | 6   |
| <b>Bias</b>                       | 9   | Describe any efforts to address potential sources of bias due to confounding, selection, or information bias                                                                                                                                                                                          |     |
| <b>Study size</b>                 | 10  | (a) Describe how the study size was arrived at for each relevant level of organization                                                                                                                                                                                                                | 6   |
|                                   |     | (b) Describe how non-independence of measurements was incorporated into sample-size considerations, if applicable                                                                                                                                                                                     |     |
|                                   |     | (c) If a formal sample-size calculation was used, describe the parameters, assumptions, and methods that were used, including a justification for the effect size selected                                                                                                                            |     |
| <b>Quantitative variables</b>     | 11  | Explain how quantitative variables were handled in the analyses. If applicable, describe which groupings were chosen, and why                                                                                                                                                                         | 6   |
| <b>Statistical methods</b>        | 12  | (a) Describe all statistical methods for each objective, at a level of detail sufficient for a knowledgeable reader to replicate the methods. Include a description of the approaches to variable selection, control of confounding, and methods used to control for non-independence of observations | 6   |
|                                   |     | (b) Describe the rationale for examining subgroups and interactions and the methods used                                                                                                                                                                                                              |     |
|                                   |     | (c) Explain how missing data were addressed                                                                                                                                                                                                                                                           |     |
|                                   |     | (d) If applicable, describe the analytical approach to loss to follow-up, matching, complex sampling, and multiplicity of analyses                                                                                                                                                                    |     |
|                                   |     | (e) Describe any methods used to assess the robustness of the analyses (e.g., sensitivity analyses or quantitative bias assessment)                                                                                                                                                                   |     |
|                                   |     |                                                                                                                                                                                                                                                                                                       |     |
| <b>Participants</b>               | 13* | (a) Report the numbers of owners/managers and animals at each stage of study and at each relevant level of organization - e.g., numbers eligible, included in the study, completing follow-up, and analyzed                                                                                           | 6-7 |

|                                                                |     |                                                                                                                                                                                                                                                                              |      |
|----------------------------------------------------------------|-----|------------------------------------------------------------------------------------------------------------------------------------------------------------------------------------------------------------------------------------------------------------------------------|------|
|                                                                |     | (b) Give reasons for non-participation at each stage and at each relevant level of organization                                                                                                                                                                              |      |
|                                                                |     | (c) Consider use of a flow diagram and/or a diagram of the organizational structure                                                                                                                                                                                          |      |
| <b>Descriptive data on exposures and potential confounders</b> | 14* | (a) Give characteristics of study participants (e.g., demographic, clinical, social) and information on exposures and potential confounders by group and level of organization, if applicable                                                                                | 7    |
|                                                                |     | (b) Indicate number of participants with missing data for each variable of interest and at all relevant levels of organization                                                                                                                                               |      |
|                                                                |     | (c) Summarize follow-up time (e.g., average and total amount), if appropriate to the study design                                                                                                                                                                            |      |
| <b>Outcome data</b>                                            | 15* | (a) Report outcomes as appropriate for the study design and summarize at all relevant levels of organization                                                                                                                                                                 | 7    |
|                                                                |     | (b) For proportions and rates, report the numerator and denominator                                                                                                                                                                                                          |      |
|                                                                |     | (c) For continuous outcomes, report the number of observations and a measure of variability                                                                                                                                                                                  |      |
| <b>Main results</b>                                            | 16  | (a) Give unadjusted estimates and, if applicable, adjusted estimates and their precision (e.g., 95% confidence interval). Make clear which confounders and interactions were adjusted. Report all relevant parameters that were part of the model                            | 7-8  |
|                                                                |     | (b) Report category boundaries when continuous variables were categorized                                                                                                                                                                                                    |      |
|                                                                |     | (c) If relevant, consider translating estimates of relative risk into absolute risk for a meaningful time period                                                                                                                                                             |      |
| <b>Other analyses</b>                                          | 17  | Report other analyses done, such as sensitivity/robustness analysis and analysis of subgroups                                                                                                                                                                                |      |
| <b>Key results</b>                                             | 18  | Summarize key results with reference to study objectives                                                                                                                                                                                                                     | 3,10 |
| <b>Strengths and Limitations</b>                               | 19  | Discuss strengths and limitations of the study, taking into account sources of potential bias or imprecision. Discuss both direction and magnitude of any potential bias                                                                                                     | 3,10 |
| <b>Interpretation</b>                                          | 20  | Give a cautious overall interpretation of results considering objectives, limitations, multiplicity of analyses, results from similar studies, and other relevant evidence                                                                                                   | 10   |
| <b>Generalizability</b>                                        | 21  | Discuss the generalizability (external validity) of the study results                                                                                                                                                                                                        | 8-10 |
| <b>Funding Transparency</b>                                    | 22  | (a) Funding- Give the source of funding and the role of the funders for the present study and, if applicable, for the original study on which the present article is based<br>(b) Conflicts of interest-Describe any conflicts of interest, or lack thereof, for each author | 11   |

|  |  |                                                                                                                                                                                                                                                                                                                       |  |
|--|--|-----------------------------------------------------------------------------------------------------------------------------------------------------------------------------------------------------------------------------------------------------------------------------------------------------------------------|--|
|  |  | <p>(c) Describe the authors' roles- Provision of an authors' declaration of transparency is recommended</p> <p>(d) Ethical approval- Include information on ethical approval for use of animal and human subjects</p> <p>(e) Quality standards-Describe any quality standards used in the conduct of the research</p> |  |
|--|--|-----------------------------------------------------------------------------------------------------------------------------------------------------------------------------------------------------------------------------------------------------------------------------------------------------------------------|--|

<sup>a</sup> Level of organization recognizes that observational studies in veterinary research often deal with repeated measures (within an animal or herd) or animals that are maintained in groups (such as pens and herds); thus, the observations are not statistically independent. This non-independence has profound implications for the design, analysis, and results of these studies.

<sup>b</sup> The word "participant" is used in the STROBE statement. However, for the veterinary version, it is understood that "participant" should be addressed for both the animal owner/manager and for the animals themselves.

\*Give such information separately for cases and controls in case-control studies and, if applicable, for exposed and unexposed groups in cohort and cross-sectional studies.

# BMJ Open

## Using competing risk and multistate model to estimate the impact of nosocomial infection on length of stay and mortality in burn patients in Southeast China

|                                 |                                                                                                                                                                                                                                                                            |
|---------------------------------|----------------------------------------------------------------------------------------------------------------------------------------------------------------------------------------------------------------------------------------------------------------------------|
| Journal:                        | <i>BMJ Open</i>                                                                                                                                                                                                                                                            |
| Manuscript ID                   | bmjopen-2017-020527.R1                                                                                                                                                                                                                                                     |
| Article Type:                   | Research                                                                                                                                                                                                                                                                   |
| Date Submitted by the Author:   | 10-Feb-2018                                                                                                                                                                                                                                                                |
| Complete List of Authors:       | GUO, Hai-lei; Department of Burns Surgery<br>ZHAO, Guang-ju; Emergency Department<br>LING, Xiang-wei ; Department of Burns Surgery<br>XU, Jian-jun; Department of Burns Surgery<br>LU, Cai-jiao; Department of Burns Surgery<br>LIU, zhengjun; Department of Burns Surgery |
| <b>Primary Subject Heading</b>: | Infectious diseases                                                                                                                                                                                                                                                        |
| Secondary Subject Heading:      | Epidemiology                                                                                                                                                                                                                                                               |
| Keywords:                       | burn, nosocomial infection, length of stay, mortality, multi-state model                                                                                                                                                                                                   |
|                                 |                                                                                                                                                                                                                                                                            |

SCHOLARONE™  
Manuscripts

1  
2  
3 **Using competing risk and multistate model to estimate the impact of nosocomial**  
4 **infection on length of stay and mortality in burn patients in Southeast China**

5 Hai-lei GUO<sup>1</sup>, Guang-ju ZHAO<sup>2</sup>, Xiang-wei LING<sup>1</sup>, Jian-jun XU<sup>1</sup>, Cai-jiao LU<sup>1\*</sup>,  
6  
7  
8 Zheng-jun LIU<sup>1\*</sup>  
9

10  
11  
12 <sup>1</sup>Department of Burns Surgery, The First Affiliated Hospital of Wenzhou Medical  
13 University, Wenzhou 325000, China

14  
15  
16 <sup>2</sup> Emergency Department, The First Affiliated Hospital of Wenzhou Medical  
17 University, Wenzhou 325000, China  
18  
19  
20  
21  
22  
23  
24  
25  
26  
27  
28  
29  
30  
31  
32  
33  
34  
35  
36  
37  
38  
39  
40  
41  
42  
43  
44  
45

46  
47  
48 **\* Corresponding authors:** Zheng-jun LIU, Department of Burns Surgery, The First  
49 Affiliated Hospital of Wenzhou Medical University, Wenzhou 325000, China; Tel:  
50 (+86) 577 55579432; E-mail: zhengjun1227@aliyun.com; Cai-jiao LU, Department  
51 of Burns Surgery, The First Affiliated Hospital of Wenzhou Medical University,  
52 Wenzhou 325000, China; Tel: (+86) 577 :55579433; E-mail: lucaijiao139@163.com  
53  
54  
55  
56

**Abstract:**

**Objective:** Due to the defects in skin barrier function and immune response, burn patients who survive the acute phase of a burn injury are at a high risk of nosocomial infection (NI). The aim of this study was to evaluate the impacts of NI on length of stay (LOS) and hospital mortality in burn patients using a multistate model. **Design and Setting:** A retrospective observational study was conducted in burn unit and intensive care unit (ICU) in the First Affiliated Hospital of Wenzhou Medical University, Wenzhou, China. **Participants:** Data were obtained from 1143 records of patients admitted with burn between 1 January 2013 to 31 December 2016. **Methods:** Risk factors for NIs were determined by binary logistic regression. The extended Cox model with time-varying covariates was used to determine the impact of NIs on hospital mortality, and Cumulative incidence functions (CIF) were calculated. Multiple-linear regression analysis was applied to detect the variables associated with LOS. Using a multi-state model, the extra LOS due to NI were determined. **Results:** 15.8 percent of total burn patients were suffered from NIs and incidence density of NIs was 9.6 per 1000 patient-days. NIs significantly increased the rate of death (hazard ratio: 4.30, CI<sub>95</sub> 2.229~8.298, P<0.001). The cumulative probability of death for patients with NI was greater that for those without NI. The extra LOS due to NIs was 17.68 days (CI<sub>95</sub> 11.31~24.05). **Conclusions:** Using appropriate statistical methods, the present study further illustrated that NIs was associated with the increased cumulative incidence of burn death and increased LOS in burn patients.

**Key words:** burn, nosocomial infection, length of stay, mortality, multi-state model

**Strengths and limitations of this study**

1. Using Multi-state and competing risks analysis, the present study assessed the impact of nosocomial infections on hospital mortality and length of stay in burn patients.
2. Some potential factors, such as nursing protocols and the history of immunosuppression drugs, that may be associated with NI, length of stay (LOS) and mortality were not recorded.
3. This study was performed in a single center and the results need to be further confirmed by multiple center trials.



## Introduction

Burn injury, as a common cause of morbidity and mortality, has been recognized as a global public health problem. According to the data from World Health Organization (WHO), burns account for an estimated 300, 000 deaths each year [1]. Previous evidence illustrated that burn shock and inhalation injury were the major cause of early death among patients with burn injury [2,3]. Due to the advance in fluid resuscitation, surgical approach, organ function protection, antibiotic innovation and other adjunct strategies, the early mortality of burn patients decreased dramatically over the last 30 years [4,5]. On the other hand, because of the defects in skin barrier function and immune response, burn patients who survive the acute phase of a burn injury are at a high risk of acquiring nosocomial infection (NI) [6].

It has been reported that about 30-80% of burn patients suffered from NIs [7-9]. Nevertheless, the exact impact of NIs on the LOS and mortality of burn patients remains elusive. Williams *et al* [10] investigated the predominant causes of death in burned pediatric patients. They found that infection is the leading cause of death after burn injury. A recent study reported an incidence density of 14.7 infections/1000 patient days in burn patients and NIs was not the most significant risk factors for mortality [11]. It should be noted that NI is a time-varying factor, and it can develop at any time after admission. NIs can impact on length of stay (LOS) and mortality only after they have started [12,13]. So, appropriate statistical methods for estimating the risk of death and LOS due to NI among burn patients would be helpful in making medical decisions and developing policy. The aim of this study was to determine the impacts of NI on length of stay (LOS) and hospital mortality in burn patients using a multistate model.

## Materials and methods

### 1. Patients

1  
2  
3 A retrospective study was conducted in burn unit and intensive care unit (ICU) in  
4 the First Affiliated Hospital of Wenzhou Medical University, Wenzhou, China. The  
5 burn unit has 72 beds and there are 50 beds in the ICU. After approval by the  
6 Institutional Review Board of the First Affiliated Hospital of Wenzhou Medical  
7 University, data of total 1143 patients admitted with burn were collected during  
8 January 2013 to December 2016. Inclusion criteria: (1) age of 0-99 years; (2)  
9 admission to hospital no later than 3 days post-burn; (3) LOS>48 hours. As the  
10 present study was an observational and retrospective study, informed consent was  
11 waived by the Medical Ethics Committee.  
12  
13  
14  
15  
16  
17  
18

## 19 **2. Definitions and data collection**

20  
21 NI in burn patients was defined as infection occurring 48 hours after hospital  
22 admission. There were four main types of NIs (burn wound infection, bloodstream  
23 infection, pneumonia, urinary tract infection) according to the criteria of the Centers  
24 for Disease Control and Prevention (CDC) [14]. A case of burn wound infection was  
25 defined as a patient has change in burn wound appearance or character or patient with  
26 a burn has at least two of the following without other recognized cause: fever  
27 [Temperature (T) >38°C], hypothermia (T<36°C), hypotension, oliguria (<20 cm<sup>2</sup>/hr),  
28 hyperglycemia at previously tolerated levels of dietary carbohydrate, or mental  
29 confusion, in which histologic examination of burn biopsy shows invasion of  
30 organisms into adjacent viable tissue. Bloodstream infection patient had at least one  
31 of the following clinical signs or symptoms with no other recognized cause: Fever  
32 (T>38°C), hypotension (systolic pressure ≤90 mm Hg), or oliguria (<20 cm<sup>3</sup>/h); blood  
33 culture not done or no organisms or antigen detected in blood; and no apparent  
34 infection at another site and physician instituted treatment for sepsis. Patients had  
35 rales or dullness to percussion on physical examination of the chest or a chest  
36 radiographic examination that showed new or progressive infiltrate or consolidation,  
37 cavitation, or pleural effusion and new onset of purulent sputum or change in  
38 character of sputum were diagnosed with pneumonia. Finally, urinary tract infection  
39 patient with the following signs or symptoms with no other recognizable cause: fever  
40  
41  
42  
43  
44  
45  
46  
47  
48  
49  
50  
51  
52  
53  
54  
55  
56  
57  
58  
59  
60

1  
2  
3 (T>38°C), urgency, frequency, dysuria, or suprapubic tenderness; and at least one of  
4 the following: 1) positive dipstick for leukocyte esterase and/or nitrate; 2) physician  
5 diagnosis of urinary tract infection.  
6  
7

8  
9 Patients with a history of smoke or fire exposure in a closed space or  
10 maxillofacial burn were suspected to have inhalation injury. The diagnosis of  
11 inhalation injury was made if the suspected patients had physical findings including  
12 changes in voice and carbonaceous sputum production, or had bronchoscopic  
13 evidence [15].  
14  
15  
16

17  
18 The characteristics of NI including time, site and pathogen were recorded. For  
19 patients with NI at the same site, only the first episode of it was analyzed. the  
20 potential factors which are associated with NIs, LOS and mortality were collected,  
21 including gender, age, history of diabetes, date of admission, burn types (flame,  
22 scalding, electric and others), burn size and depth and inhalation injury [7-9].  
23 Additionally, the dates of discharge and death.  
24  
25  
26  
27

### 28 29 **3. Management**

30 Resuscitation were performed according to the modified Evans (Ruijin) formula  
31 as described by previous paper [16,17]. Dressings were changed every 1-3 days by  
32 doctors. Silver sulfadiazine were applied on deep partial-thickness and full-thickness  
33 burns. For full-thickness burns, early surgical excision of burn eschar and biological  
34 closure were performed when the patients' condition permits. Prophylactic antibiotic  
35 therapy was performed in patients who needing surgical intervention (perioperative  
36 period of debridement or auto skin grafting) or requiring mechanical ventilation. The  
37 strategy of Prophylactic antibiotic therapy was mainly based on the advice of doctors  
38 from the department of microbiology and infectious diseases and the previous  
39 antibiotic susceptibility pattern of the center. Additionally, patients met CDC criteria  
40 or with identified pathogens were treated with antibiotics and adjusted according to  
41 the results of isolate's susceptibility.  
42  
43  
44  
45  
46  
47  
48  
49  
50  
51

### 52 53 **4. Statistical Analysis**

54 Data are presented as a percentage of a percentage of total or interquartile ranges  
55  
56  
57  
58  
59  
60

(25<sup>th</sup> and 75<sup>th</sup> percentiles), as appropriate. Mann-Whitney U test is used to analysis continuous variables while categorical variables were analyzed by the Chi-square test. Univariate analysis was performed to assess the potential variables associated with NI and hospital mortality. Variables included in the univariate analysis were age, sex, diabetes, burn types (flame, scalding, electric and others), TBSA (<10%, 10-29%, ≥30%), full thickness of burn, and inhalation injury. The variables with p-value less than 0.05 were used for further analysis. Cox model were used to determine the risk factors for NI and death. In Cox model, NI was modeled as a time-varying covariate by the 'survival' package in R. Cumulative incidence functions were calculated by the "cmprsk" package. Additionally, linear regression analysis was applied to detect the variables associated with hospital LOS. The 'etm' package in R was performed to calculate the difference in length of stay between patients with and without NI. There are four states in our multistate model: admission, NI, discharge alive and death. The detail information about this multistate model were shown in Figure 1.

R 3.4.1 software and SPSS 18.0 were used to prepare and analysis the data. Statistical significance was expressed as both p values and 95% confidence intervals (CI<sub>95</sub>). A two-sided p-value <0.05 was considered statistically significant.

## **Results:**

### **1. Patient characteristics**

During the study period, a total of 1143 burn patients were admitted to the hospital. 157 burn patients were ineligible by exclusion criteria, and 986 patients were included in the final analysis. Demographic and burn-related characteristics are shown in Table 1. 65.1 percent of the patients were men and 34.9% were women. The median age was 37 (interquartile range [IQR], 18-49) years and 7.1% were elderly patients (65 years and older). 47.6% of the patients had < 10% TBSA burn, 30.8% had 10-29% TBSA burn, and 21.6% of burn patients with TBSA more than 30%. The main burn type is flame (78.2%), followed by scalding (9.7%), electric (7.4%) and other types (4.7%). There were 46 (4.7%) patients had inhalation injury. The hospital

1  
2  
3 mortality was 5.5% (54/986) and the median length of hospital stay was 14 (IQR  
4 8-28).  
5

## 6 7 **2. Characteristics of NIs**

8  
9 156 burn patients had 209 NIs, and the median time from admission to the NI  
10 was 7 days (IQR 5-10). Over all NI rate was 9.6 per 1000 patient-days. Among all NIs,  
11 burn wound infection (BWI) was the most frequent infection (45.9%), followed by  
12 blood stream infection (BSI) (24.8%), pneumonia (23.4%) and urinary tract infection  
13 (UTI) (5.7%) (Fig.2A). As shown in Fig.2B, a total 237 microorganisms were isolated.  
14 The most common pathogens was *Acinetobacter baumannii* (30.8%), followed by  
15 *Pseudomonas aeruginosa* (21.5%), *klebsiella pneumoniae* (16.9%) and  
16 *Staphylococcus spp* (11%) (Fig.2B).  
17  
18  
19  
20  
21  
22

23 Univariate analysis indicated that there were significant differences in age, the  
24 percentage of patients more than 65 years old, diabetes, TBSA<10%, TBSA≥30%,  
25 full thickness burn, inhalation injury and LOS between burn patients with and without  
26 NIs (Table 1). Using a Cox regression model, there was a statistically significant  
27 increased odds ratio for NI in patients with age>65 years (HR 1.863; CI<sub>95</sub>  
28 1.135~3.060, p=0.014), full thickness burn (HR 1.721; CI<sub>95</sub> 1.235~2.398, p<0.001),  
29 and inhalation injury (OR 3.618; CI<sub>95</sub> 2.378~5.505, p<0.001) (Table 2).  
30  
31  
32  
33  
34  
35

## 36 37 **3. Impact of NIs on hospital death of burn patients**

38 As shown in Table 1, the hospital mortality of patients with and without NI were  
39 16.0% and 3.5%, respectively. Univariate analysis indicated that the hospital mortality  
40 of patients with NIs were higher than those without NIs (Table S1). Using a Cox  
41 regression model with NI modeled as a time-varying covariate, we found the risk of  
42 hospital death for patients with NI was 5.92 times higher than that for patients without  
43 it (CI<sub>95</sub> 3.098~11.31, P<0.001). After adjusting for TBSA and inhalation injury, the  
44 risk of hospital death for patients with NI was 4.30 times higher than for patients  
45 without NI (CI<sub>95</sub> 2.229~8.298, P<0.001) (Table 2, Table S1). Cumulative incidence  
46 functions for death were shown in Fig 3A. The cumulative probability of discharge  
47 was consistently lesser for an infected patient (left panel). As shown in Fig 3B, the  
48  
49  
50  
51  
52  
53  
54  
55  
56

1  
2  
3 cumulative probability of death for a patient with NI was greater than for a patient  
4 without NI (right panel).  
5

#### 6 7 **4. Extra length of stay**

8  
9 As shown in Fig.1, the median LOS for patients without NI was 13 days (IQR  
10 7-24). For patients with NI, the median LOS was 27 days (IQR 13.25-57.75). Because  
11 the LOS distribution is positively skewed, the logarithm (base 10) of LOS was used as  
12 the response variable in multiple linear regressions. Based on the results of multiple  
13 linear regressions, NI was associated with LOS in burn patients. Other variables  
14 associated with LOS were TBSA, electric burn, flame burn, full thickness (Table 3).  
15 Using a multi-state model, the extra length of stay due to NI was 17.68 days [CI<sub>95</sub>  
16 11.31~24.05, standard error (SE): 3.25, P<0.001] (Fig. 4).  
17  
18  
19  
20  
21  
22  
23  
24

#### 25 **Discussion:**

26  
27 Burn patients are at high risk for local and systemic infections. Although  
28 infection control program has been performed in most burn centers and hospitals, the  
29 incidence of NI remain high until now. Alp E et al. reported 11 percent of total burn  
30 patients were suffered from NI and incidence density was 14.7 per 1000 patient days  
31 [11]. In patients who have > 20% TBSA burn and need for surgical intervention, the  
32 incidence of NI was 70% [18]. In the present study, incidence density of NI was 9.6  
33 per 1000 patient days which was less than the rate reported by Alp E et al. and  
34 Jeschke MG et al. BWIs was the most common infections in our burn center. *A.*  
35 *baumannii* and *P. aeruginosa* accounted for about 50% of total isolates, and *A.*  
36 *baumannii* was the predominant pathogen. Previously study illustrated that *A.*  
37 *baumannii* was the most common Gram-negative pathogen isolated from burn  
38 patients [9]. According to the data published by Alp E et al [11], 57% of isolates from  
39 burns was *A. baumannii* in 2009. As *A. baumannii* is increasingly implicated as a  
40 main cause of NI, more strict measures have been taken to reduce the incidence of *A.*  
41 *baumannii* infection, especially in Asian countries [19].  
42  
43  
44  
45  
46  
47  
48  
49  
50  
51  
52  
53

54 Many factors contribute to the incidence of NI in burns, including burn injury  
55  
56

1  
2  
3 induced immunosuppression [6-9]. Clinical and experimental evidence illustrated that  
4 severe systemic inflammation after burn injuries can result in a compensatory  
5 down-regulation of immune responses, which is characterized by decreased number  
6 of T helper lymphocytes, increased suppressive activity of Foxp3<sup>+</sup>T cells as well as  
7 elevated levels of anti-inflammatory cytokines[20-22]. The immune response declines  
8 in efficiency with age, and increased susceptibility to infection was also observed by  
9 previous studies [12,23]. The present study showed that burn patients older than 65  
10 years were more susceptible to NI. Similar to the previous reports, full thickness burn  
11 and inhalation injury were observed to be associated with NI [8,9,11].

12  
13  
14  
15  
16  
17  
18  
19  
20 The most notable finding in this study was the association between NIs and  
21 hospital mortality in burn patients. It has been reported that, in patients with more  
22 than 40% TBSA, over 70% of all deaths were related to sepsis resulting from BWIs  
23 and other infection complications [6,8,9,11,24]. Nevertheless, some evidence  
24 illustrated that NIs were not the main factor of death in overall burn patients. The  
25 different severity of burn injury and statistical method may contribute to the different  
26 results. In the present study, overall burn patients during the study period were  
27 enrolled, and NI was modeled as a time-varying factor in a competing risk model. The  
28 results illustrated that the risk of hospital death for burns with NI was 4.30 times  
29 higher than that for patients without it, and the cumulative probability of discharge  
30 was consistently lesser for an infected patient. Burn size was a main negative risk  
31 factor for death [18, 25-26]. The associated between TBSA and mortality was  
32 observed in the present study which was consist with the results of other studies  
33 [25,26]. Inhalation injury usually cause pulmonary and systemic complications which  
34 greatly increases the risk of death after burn and the results of our study confirmed  
35 this [25-26].

36  
37  
38  
39  
40  
41  
42  
43  
44  
45  
46  
47  
48  
49 The association between NI and LOS has been illustrated by many studies. The  
50 median LOS was about 2-fold higher in trauma patients with NI compared with  
51 patients without infection [27]. Among patients with critical illness, NI increased the  
52 LOS by approximately 18 days per patients [28]. NI after burn has been considered as



1  
2  
3 a risk factor for prolonged LOS, although clinical data are still lacking. Shupp JW et  
4 al. reported that BSI was associated with longer hospital LOS in burn patients [26].  
5  
6 Nevertheless, NI can only impact LOS after it has started and the duration of  
7 hospitalization prior to the infection should be controlled. So, a multistate model was  
8  
9 used in the present study to estimation of extra LOS caused by NI. We found that the  
10  
11 extra length of stay due to NI in burn patients was 17.68 days.  
12  
13

14 There are some limitations in the present study. First, efforts used to prevent NI,  
15 such as antibiotic treatment and surgery, may have been started before the diagnosis  
16 was made. So, our assessment of the impact of NI on LOS and hospital mortality  
17 should be regarded as a lower estimate. Second, as an observational and retrospective  
18 study, some potential factors, such as nursing protocols and the use of anti-peptic  
19 ulcer or immunosuppression drugs, that may be associated with NIs, LOS and death  
20 were not available. These factors need to be taken into consideration in the  
21 prospective studies. Additionally, the present study was performed in a single center  
22 and the results need to be further confirmed by multiple center trials.  
23  
24  
25  
26  
27  
28  
29

### 30 **Conclusion:**

31  
32 The present study provided additional information about the impact of NI on  
33 LOS and hospital mortality in burn patients. Using competing risk and multistate  
34 model, we found that nosocomial infection was associated with the increased  
35 cumulative incidence of burn death. The expected extra Length of stay due to  
36 nosocomial infections among burn patients was 14.6 days. The model used in the  
37 present study may help to improve the accuracy of estimates of LOS and incidence of  
38 death due to NIs in burns.  
39  
40  
41  
42  
43  
44  
45

### 46 **Funding:**

47  
48 This work was supported by grants from the National Natural Science Foundation  
49 (grant number 81401621) and Wenzhou Municipal Science and Technology Project  
50 (grant numbers Y2013010, 2015KYB239).  
51  
52  
53  
54  
55  
56  
57



**Conflict of interest:**

The authors declare that they have no competing interests

**Authors' contributions**

HLG and ZJL wrote the protocol, participated in the data analysis, and contributed to writing this manuscript. GJZ, XWL, JJX and CJL collected the data. All authors have read and approved the final manuscript.

**Ethics approval:** Institutional Review Board of the First Affiliated Hospital of Wenzhou Medical University.

**Provenance and peer review:** Not commissioned; externally peer reviewed.

**Data sharing statement:** No additional data are available.

**References:**

1. Mock C, Peck M, Peden M, Krug E, Eds . A WHO plan for burn prevention and care. Geneva: World Health Organisation; 2008.
2. Bloemsma GC, Dokter J, Boxma H, Oen IM. Mortality and causes of death in a burn centre. *Burns* 2008; 34:1103-7.
3. Ryan CM, Schoenfeld DA, Thorpe WP, Sheridan RL, Cassem EH, Tompkins RG. Objective estimates of the probability of death from burn injuries. *N Engl J Med* 1998; 338:362-6.
4. Tompkins RG. Survival from burns in the new millennium: 70 years' experience from a single institution. *Ann Surg* 2015; 261:263-8.
5. Tompkins RG, Liang MH, Lee AF, Kazis LE; Multi-Center Benchmarking Study Working Group. The American Burn Association/Shriners Hospitals for Children Burn Outcomes Program: a progress report at 15 years. *J Trauma Acute Care Surg* 2012; 73:S173-8.

- 1  
2  
3 6. Church D, Elsayed S, Reid O, Winston B, Lindsay R. Burn wound infections. *Clin*  
4 *Microbiol Rev* 2006; 19:403-34.
- 5  
6  
7 7. Keen EF 3rd, Robinson BJ, Hospenthal DR, Aldous WK, Wolf SE, Chung KK, et al.  
8 Incidence and bacteriology of burn infections at a military burn center. *Burns* 2010;  
9 36:461-8.
- 10  
11  
12 8. Öncül O, Öksüz S, Acar A, ülkür E, Turhan V, Uygur F, et al. Nosocomial infection  
13 characteristics in a burn intensive care unit: analysis of an eleven-year active  
14 surveillance. *Burns* 2014; 40:835-41.
- 15  
16  
17 9. Leseva M, Arguirova M, Nashev D, Zamfirova E, Hadzhyiski O. Nosocomial  
18 infections in burn patients: etiology, antimicrobial resistance, means to control. *Ann*  
19 *Burns Fire Disasters* 2013; 26:5-11.
- 20  
21  
22 10. Williams FN, Herndon DN, Hawkins HK, Lee JO, Cox RA, Kulp GA, et al. The  
23 leading causes of death after burn injury in a single pediatric burn center. *Crit Care*.  
24 2009;13(6):R183.
- 25  
26  
27 11. Alp E, Coruh A, Gunay GK, Yontar Y, Doganay M. Risk factors for nosocomial  
28 infection and mortality in burn patients: 10 years of experience at a university hospital.  
29 *J Burn Care Res* 2012; 33:379-85.
- 30  
31  
32 12. Zhao GJ, Li D, Zhao Q, Song JX, Chen XR, Hong GL, Li MF, et al. Incidence,  
33 risk factors and impact on outcomes of secondary infection in patients with septic  
34 shock: an 8-year retrospective study. *Sci Rep* 2016; 6:38361.
- 35  
36  
37 13. De Angelis G, Murthy A, Beyersmann J, Harbarth S. Estimating the impact of  
38 healthcare-associated infections on length of stay and costs. *Clin Microbiol Infect*.  
39 2010;16:1729-35.
- 40  
41  
42 14. Horan TC, Andrus M, Dudeck MA. CDC/NHSN surveillance definition of health  
43 care-associated infection and criteria for specific types of infections in the acute care  
44 setting. *Am J Infect Control* 2008; 36:309-32
- 45  
46  
47 15. Walker PF, Buehner MF, Wood LA, Boyer NL, Driscoll IR, Lundy JB, et al.  
48 Diagnosis and management of inhalation injury: an updated review. *Crit Care* 2015;  
49 19:351.
- 50  
51  
52  
53  
54  
55  
56  
57  
58  
59  
60

16. Shi Y, Zhang X, Huang BG, Wang WK, Liu Y. Severe burn injury in late pregnancy: a case report and literature review. *Burns Trauma* 2015;3:2.
17. Chen Z, Yuan K. Another important factor affecting fluid requirement after severe burn: a retrospective study of 166 burn patients in Shanghai. *Burns*. 2011; 37:1145-9.
18. Jeschke MG, Pinto R, Kraft R, Nathens AB, Finnerty CC, Gamelli RL, et al. Morbidity and survival probability in burn patients in modern burn care. *Crit Care Med* 2015; 43:808-15.
19. Chen B, He LX, Hu B, Ni YX, Qiu H, Shi Y, et al. Expert Consensus Document on *Acinetobacter baumannii* infection diagnosis, treatment and prevention in China. *Zhong Hua Yi Xue Za Zhi* 2012; 92:76–85.
20. Schwacha MG, Chaudry IH. The cellular basis of post-burn immunosuppression: macrophages and mediators. *Int J Mol Med* 2002; 10:239-43.
21. Parment K, Zetterberg A, Ernerudh J, Bakteman K, Steinwall I, Sjoberg F. Long-term immunosuppression in burned patients assessed by in vitro neutrophil oxidative burst (Phagoburst). *Burns* 2007; 33:865-71.
22. Huang LF, Yao YM, Dong N, Yu Y, He LX, Sheng ZY. Association between regulatory T cell activity and sepsis and outcome of severely burned patients: a prospective, observational study. *Crit Care* 2010; 14:R3.
23. Rani M, Schwacha MG. Aging and the pathogenic response to burn. *Aging Dis* 2012; 3:171-80.
24. Fitzwater J, Purdue GF, Hunt JL, O'Keefe GE. The risk factors and time course of sepsis and organ dysfunction after burn trauma. *J Trauma* 2003; 54:959-66.
25. Smith DL, Cairns BA, Ramadan F, Dalston JS, Fakhry SM, Rutledge R, et al. Effect of inhalation injury, burn size, and age on mortality: a study of 1447 consecutive burn patients. *J Trauma* 1994; 37:655-9.
26. Li H, Yao Z, Tan J, Zhou J, Li Y, Wu J, et al. Epidemiology and outcome analysis of 6325 burn patients: a five-year retrospective study in a major burn center in Southwest China. *Sci Rep* 2017; 7:46066.
27. Glance LG, Stone PW, Mukamel DB, Dick AW. Increases in mortality, length of

1  
2  
3 stay, and cost associated with hospital-acquired infections in trauma patients. Arch  
4 Surg 2011; 146:794-801.

5  
6  
7 28. Chen YY, Chou YC, Chou P. Impact of nosocomial infection on cost of illness and  
8 length of stay in intensive care units. Infect Control Hosp Epidemiol 2005; 26:281-7.  
9

### 10 11 12 **Figure legends**

13  
14  
15  
16 **Figure.1 Multistate model.** Our model including four states: admission, nosocomial  
17 infection, discharge alive and death. After admission, patients may be infected or not,  
18 then they may be discharge alive or die.  
19  
20

21  
22  
23 **Figure.2 Characteristics of nosocomial infections.** BWI: Burn wound infection;  
24 BSI: blood stream infection; PI: pulmonary infection; UTI: urinary tract infection.  
25  
26

27  
28  
29 **Figure.3 Cumulative incidence functions for discharge (A) and death (B) in burn**  
30 **patients.** red lines: nosocomial infection; black lines: no nosocomial infection.  
31  
32

33  
34 **Figure 4. Extra length of stay in patients without (red line) and with (black line)**  
35 **infection.** LOS: length of stay. NI: nosocomial infection  
36  
37  
38  
39  
40  
41  
42  
43  
44  
45  
46  
47  
48  
49  
50  
51  
52  
53  
54  
55  
56  
57  
58  
59  
60

**Table 1. Demographics and clinical characteristic of burn patients with and without nosocomial infection.**

| Variables                               | Total<br>n=986 | NI<br>n=156       | No-NI<br>n=830 | <i>P</i> value   |
|-----------------------------------------|----------------|-------------------|----------------|------------------|
| <b>Male, n(%)</b>                       | 642 (65.1%)    | 105 (64.7%)       | 537 (67.3%)    | 0.530            |
| <b>Age (years), median (25th, 75th)</b> | 37 (18,49)     | 37 (17,49)        | 37 (24,37)     | 0.470            |
| <b>≥65 years, n(%)</b>                  | 70 (7.1%)      | 20 (12.8%)        | 50 (6.0%)      | <b>0.002</b>     |
| <b>Diabetes, n (%)</b>                  | 38 (3.9%)      | 11 (7.1%)         | 27 (3.3%)      | <b>0.024</b>     |
| <b>TBSA, n (%)</b>                      |                |                   |                |                  |
| <10%                                    | 469 (47.6%)    | 55 (35.3%)        | 414 (49.9%)    | <b>0.031</b>     |
| 10-29%                                  | 304 (30.8%)    | 38 (24.4%)        | 266 (32.0%)    | 0.056            |
| ≥30%                                    | 213(21.6%)     | 63 (40.3%)        | 150 (18.1%)    | <b>&lt;0.001</b> |
| <b>Full thickness burn, n (%)</b>       | 221 (22.4%)    | 60 (38.5%)        | 161 (19.4%)    | <b>&lt;0.001</b> |
| <b>Inhalation injury, n (%)</b>         | 46 (4.7%)      | 38 (24.3%)        | 8 (1.0%)       | <b>&lt;0.001</b> |
| <b>Burn type, n (%)</b>                 |                |                   |                |                  |
| flame                                   | 771 (78.2%)    | 118 (75.6%)       | 653 (84.7%)    | 0.4              |
| scalding                                | 96 (9.7%)      | 11 (7.1%)         | 85 (10.2%)     | 0.218            |
| electric                                | 73 (7.4%)      | 15 (9.6%)         | 58 (7.0%)      | 0.25             |
| others                                  | 46 (4.7%)      | 12 (7.7%)         | 34 (4.1%)      | 0.051            |
| <b>Length of hospital stay</b>          |                |                   |                |                  |
| median (25th, 75th)                     | 14 (8, 28)     | 27 (13.25, 57.75) | 13 (7, 24)     | <b>&lt;0.001</b> |

1  
2  
3  
4  
5  
6  
7  
8  
9  
10  
11  
12  
13  
14  
15  
16  
17  
18  
19  
20  
21  
22  
23  
24  
25  
26  
27  
28  
29  
30  
31  
32  
33  
34  
35  
36  
37  
38  
39  
40  
41  
42  
43  
44  
45  
46  
47

---

|                                     |           |         |        |                  |
|-------------------------------------|-----------|---------|--------|------------------|
| <b>In-hospital mortality, n (%)</b> | 54 (5.5%) | 25 16.0 | 29 3.5 | <b>&lt;0.001</b> |
|-------------------------------------|-----------|---------|--------|------------------|

---

NI: nosocomial infection; TBSA: total body surface area

For peer review only

**Table.2 Results of the Cox-proportional hazard analysis of nosocomial infection and hospital death**

| Outcomes | Variables            | HR    | CI <sub>95</sub> | P value |
|----------|----------------------|-------|------------------|---------|
| NI       | Age>65 years         | 1.863 | 1.135 ~3.060     | 0.014   |
|          | Full thickness burn  | 1.721 | 1.235~2.398      | <0.001  |
|          | Inhalation injury    | 3.618 | 2.378~5.505      | <0.001  |
| Death    | Nosocomial infection | 4.301 | 2.229~8.298      | <0.001  |
|          | TBSA                 | 1.751 | 1.169~2.621      | 0.006   |
|          | Inhalation injury    | 2.740 | 1.436~5.227      | 0.002   |

NI: nosocomial infection; TBSA: total body surface area; HR: hazard ratio; CI<sub>95</sub>: 95% confidence interval

**Table.3 Results of multiple linear regressions analysis of length of stay (days)**

| Variables            | B     | CI <sub>95</sub> | P value |
|----------------------|-------|------------------|---------|
| TBSA                 | 0.085 | 0.056~0.113      | <0.001  |
| Full thickness burn  | 0.105 | 0.052~0.157      | <0.001  |
| Electric burn        | 0.228 | 0.129~0.328      | <0.001  |
| Flame burn           | 0.093 | 0.031~0.155      | <0.001  |
| Nosocomial infection | 0.244 | 0.184~0.305      | <0.001  |

TBSA: total body surface area; CI<sub>95</sub>: 95% confidence interval

1  
2  
3  
4  
5  
6  
7  
8  
9  
10  
11  
12  
13  
14  
15  
16  
17  
18  
19  
20  
21  
22  
23  
24  
25  
26  
27  
28  
29  
30  
31  
32  
33  
34  
35  
36  
37  
38  
39  
40  
41  
42  
43  
44  
45  
46  
47  
48  
49  
50  
51  
52  
53  
54  
55  
56  
57  
58  
59  
60

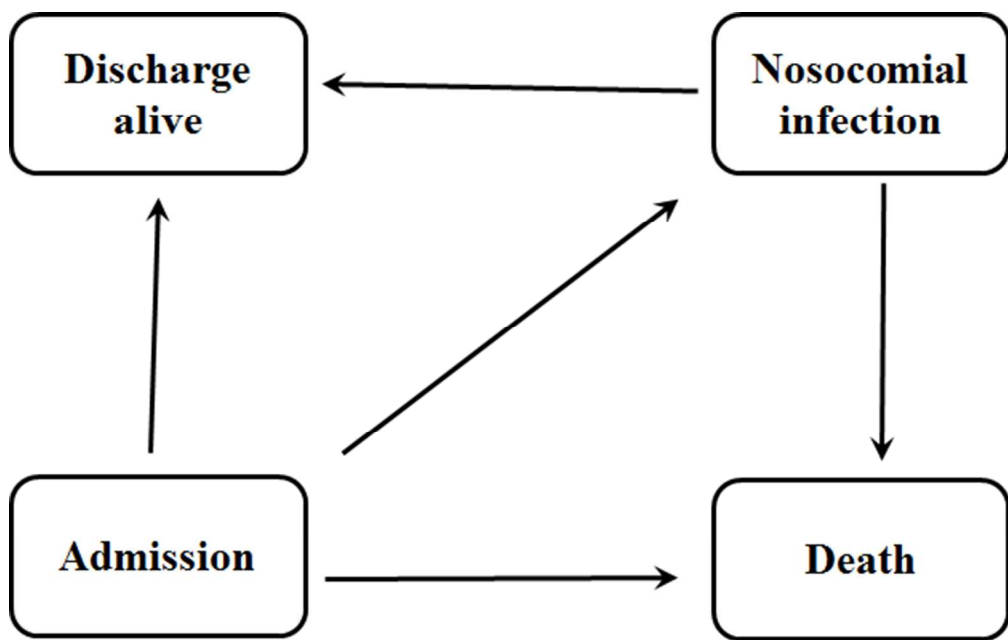

Figure.1 Multistate model.  
220x138mm (300 x 300 DPI)

Review only



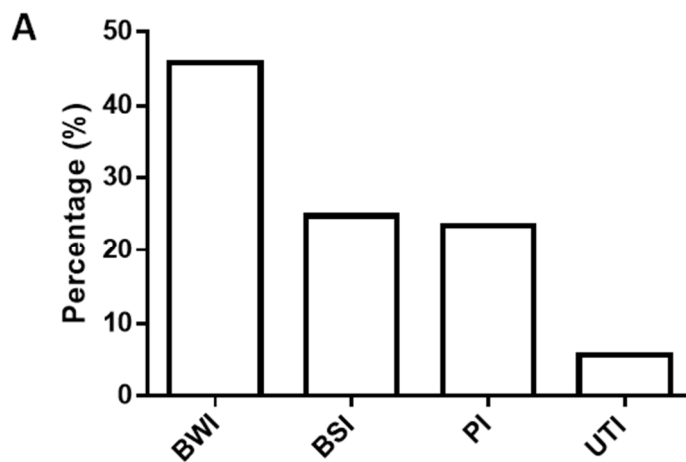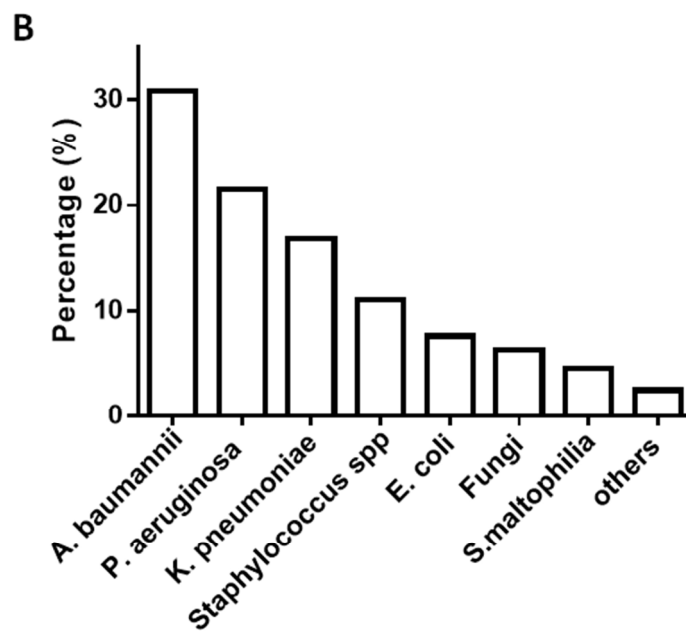

Characteristics of nosocomial infections

195x322mm (300 x 300 DPI)

1  
2  
3  
4  
5  
6  
7  
8  
9  
10  
11  
12  
13  
14  
15  
16  
17  
18  
19  
20  
21  
22  
23  
24  
25  
26  
27  
28  
29  
30  
31  
32  
33  
34  
35  
36  
37  
38  
39  
40  
41  
42  
43  
44  
45  
46  
47  
48  
49  
50  
51  
52  
53  
54  
55  
56  
57  
58  
59  
60

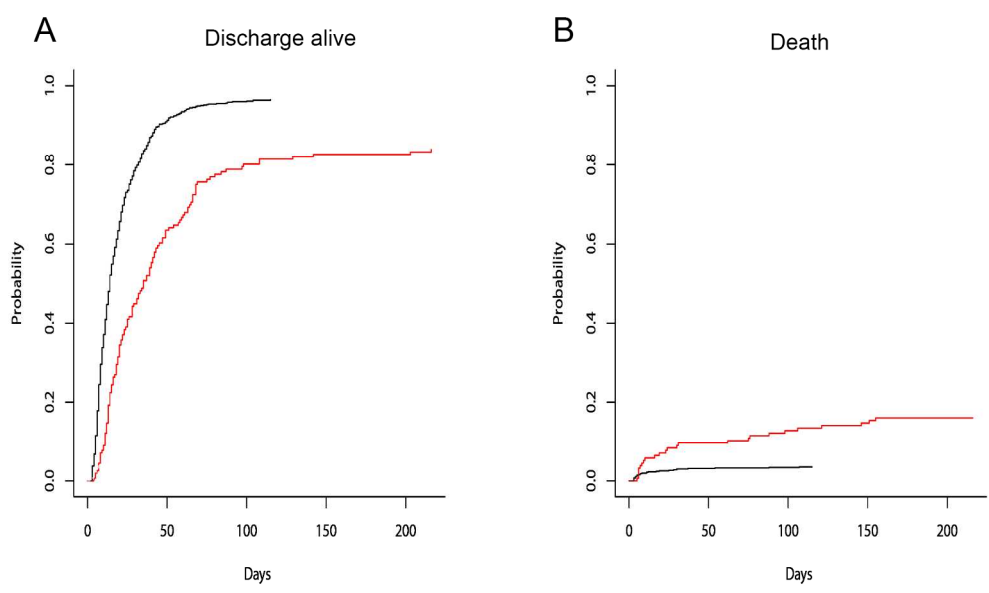

Cumulative incidence functions for discharge (A) and death (B) in burn patients

190x127mm (300 x 300 DPI)

view only

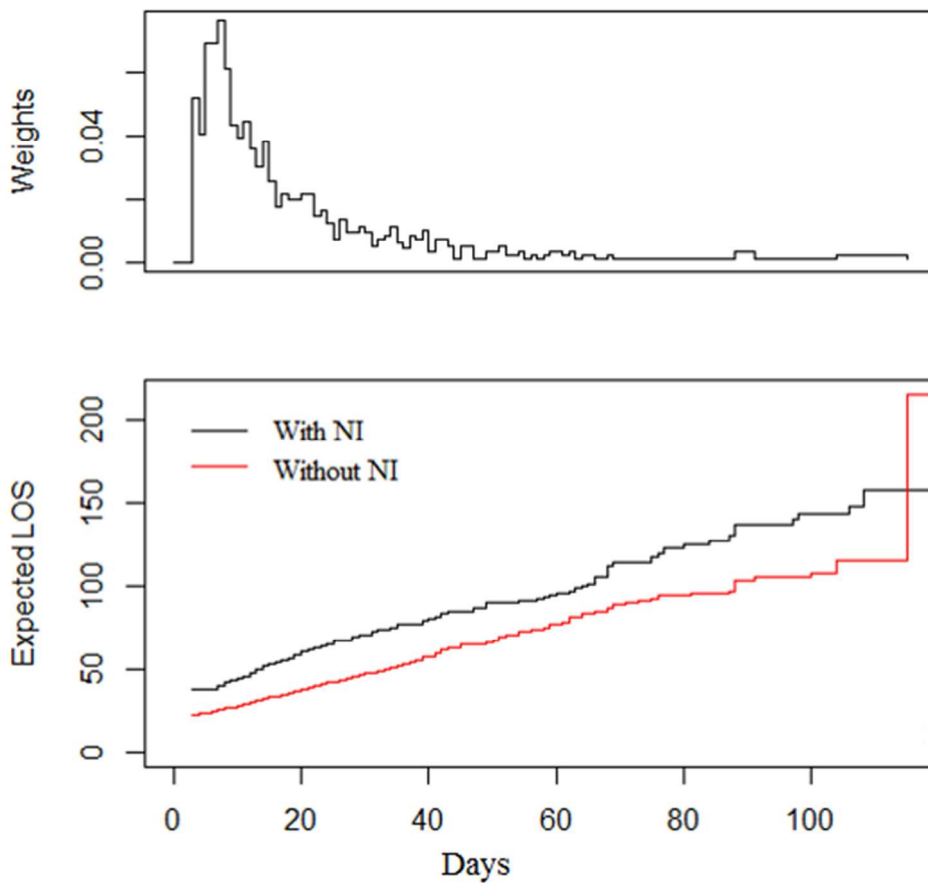

Extra length of stay in patients without (red line) and with (black line) infection.

275x275mm (300 x 300 DPI)

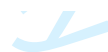

**Table S1. Baseline characteristics of burn patients according to survive or not.**

| <b>Variables</b>                        | <b>Survivors<br/>(n=932)</b> | <b>Non-Survivors<br/>(n=54)</b> | <b>P value</b>   |
|-----------------------------------------|------------------------------|---------------------------------|------------------|
| <b>Male, n(%)</b>                       | 604 (64.8%)                  | 38 (70.4%)                      | 0.405            |
| <b>Age (years), median (25th, 75th)</b> | 37 (18, 49)                  | 40 (24, 50)                     | 0.305            |
| <b>≥65 years, n(%)</b>                  | 64 (6.9%)                    | 6 (11.1%)                       | 0.238            |
| <b>Diabetes, n (%)</b>                  | 36 (3.9%)                    | 2 (3.7%)                        | 0.953            |
| <b>TBSA, n (%)</b>                      |                              |                                 |                  |
| <10%                                    | 464 (49.8%)                  | 5 (9.3%)                        | <b>&lt;0.001</b> |
| 10-29%                                  | 287 (30.8%)                  | 17 (31.5%)                      | 0.915            |
| ≥30%                                    | 181 (19.4%)                  | 32 (59.3%)                      | <b>&lt;0.001</b> |
| <b>Full thickness burn, n (%)</b>       | 208 (22.3%)                  | 13 (24.1%)                      | 0.763            |
| <b>Inhalation injury, n (%)</b>         | 24 (2.6%)                    | 22 (40.7%)                      | <b>&lt;0.001</b> |
| <b>Burn types, n (%)</b>                |                              |                                 |                  |
| Flame                                   | 727 (78.0%)                  | 44 (81.5%)                      | 0.547            |
| Scalding                                | 89 (9.5%)                    | 5 (9.3%)                        | 0.944            |
| Electric                                | 71 (7.6%)                    | 2 (2.7%)                        | 0.285            |
| Others                                  | 43 (4.6%)                    | 3 (5.6%)                        | 0.750            |
| <b>NI, n (%)</b>                        | 131 (14.1%)                  | 25 (46.3%)                      | <b>&lt;0.001</b> |

NI: nosocomial infection; TBSA: total body surface area

## STROBE Statement—checklist of items that should be included in reports of observational studies

|                              | Item No           | Recommendation                                                                                                                                                                                                                                                                                                                                                                                                                                                                                                                                                                                                                                                                                             |
|------------------------------|-------------------|------------------------------------------------------------------------------------------------------------------------------------------------------------------------------------------------------------------------------------------------------------------------------------------------------------------------------------------------------------------------------------------------------------------------------------------------------------------------------------------------------------------------------------------------------------------------------------------------------------------------------------------------------------------------------------------------------------|
| <b>Title and abstract</b>    | <b>P2</b> 1       | (a) Indicate the study's design with a commonly used term in the title or the abstract<br>(b) Provide in the abstract an informative and balanced summary of what was done and what was found                                                                                                                                                                                                                                                                                                                                                                                                                                                                                                              |
| <b>Introduction</b>          |                   |                                                                                                                                                                                                                                                                                                                                                                                                                                                                                                                                                                                                                                                                                                            |
| Background/rationale         | <b>P4</b> 2       | Explain the scientific background and rationale for the investigation being reported                                                                                                                                                                                                                                                                                                                                                                                                                                                                                                                                                                                                                       |
| Objectives                   | <b>P4</b> 3       | State specific objectives, including any prespecified hypotheses                                                                                                                                                                                                                                                                                                                                                                                                                                                                                                                                                                                                                                           |
| <b>Methods</b>               |                   |                                                                                                                                                                                                                                                                                                                                                                                                                                                                                                                                                                                                                                                                                                            |
| Study design                 | <b>P4</b> 4       | Present key elements of study design early in the paper                                                                                                                                                                                                                                                                                                                                                                                                                                                                                                                                                                                                                                                    |
| Setting                      | <b>P4</b> 5       | Describe the setting, locations, and relevant dates, including periods of recruitment, exposure, follow-up, and data collection                                                                                                                                                                                                                                                                                                                                                                                                                                                                                                                                                                            |
| Participants                 | 6                 | (a) <i>Cohort study</i> —Give the eligibility criteria, and the sources and methods of selection of participants. Describe methods of follow-up<br><i>Case-control study</i> —Give the eligibility criteria, and the sources and methods of case ascertainment and control selection. Give the rationale for the choice of cases and controls<br><b>P5</b> <i>Cross-sectional study</i> —Give the eligibility criteria, and the sources and methods of selection of participants<br>(b) <i>Cohort study</i> —For matched studies, give matching criteria and number of exposed and unexposed<br><i>Case-control study</i> —For matched studies, give matching criteria and the number of controls per case |
| Variables                    | <b>P5</b> 7       | Clearly define all outcomes, exposures, predictors, potential confounders, and effect modifiers. Give diagnostic criteria, if applicable                                                                                                                                                                                                                                                                                                                                                                                                                                                                                                                                                                   |
| Data sources/<br>measurement | <b>P5-6</b><br>8* | For each variable of interest, give sources of data and details of methods of assessment (measurement). Describe comparability of assessment methods if there is more than one group                                                                                                                                                                                                                                                                                                                                                                                                                                                                                                                       |
| Bias                         | 9                 | Describe any efforts to address potential sources of bias                                                                                                                                                                                                                                                                                                                                                                                                                                                                                                                                                                                                                                                  |
| Study size                   | 10                | Explain how the study size was arrived at                                                                                                                                                                                                                                                                                                                                                                                                                                                                                                                                                                                                                                                                  |
| Quantitative variables       | <b>P5-6</b><br>11 | Explain how quantitative variables were handled in the analyses. If applicable, describe which groupings were chosen and why                                                                                                                                                                                                                                                                                                                                                                                                                                                                                                                                                                               |
| Statistical methods          | <b>P6-7</b><br>12 | (a) Describe all statistical methods, including those used to control for confounding<br>(b) Describe any methods used to examine subgroups and interactions<br>(c) Explain how missing data were addressed<br>(d) <i>Cohort study</i> —If applicable, explain how loss to follow-up was addressed<br><i>Case-control study</i> —If applicable, explain how matching of cases and controls was addressed<br><i>Cross-sectional study</i> —If applicable, describe analytical methods taking account of sampling strategy<br>(e) Describe any sensitivity analyses                                                                                                                                          |

Continued on next page

1  
2  
3  
4  
5  
6  
7  
8  
9  
10  
11  
12  
13  
14  
15  
16  
17  
18  
19  
20  
21  
22  
23  
24  
25  
26  
27  
28  
29  
30  
31  
32  
33  
34  
35  
36  
37  
38  
39  
40  
41  
42  
43  
44  
45  
46  
47  
48  
49  
50  
51  
52  
53  
54  
55  
56  
57  
58  
59  
60

| <b>Results</b>           |                 |                                                                                                                                                                                                                                                                                                                                                                                                               |
|--------------------------|-----------------|---------------------------------------------------------------------------------------------------------------------------------------------------------------------------------------------------------------------------------------------------------------------------------------------------------------------------------------------------------------------------------------------------------------|
| Participants             | 13*             | <b>P7</b> (a) Report numbers of individuals at each stage of study—eg numbers potentially eligible, examined for eligibility, confirmed eligible, included in the study, completing follow-up, and analysed<br>(b) Give reasons for non-participation at each stage<br>(c) Consider use of a flow diagram                                                                                                     |
| Descriptive data         | 14*             | <b>P7</b> (a) Give characteristics of study participants (eg demographic, clinical, social) and information on exposures and potential confounders<br>(b) Indicate number of participants with missing data for each variable of interest<br>(c) <i>Cohort study</i> —Summarise follow-up time (eg, average and total amount)                                                                                 |
| Outcome data             | 15*             | <i>Cohort study</i> —Report numbers of outcome events or summary measures over time<br><i>Case-control study</i> —Report numbers in each exposure category, or summary measures of exposure<br><b>P7</b> <i>Cross-sectional study</i> —Report numbers of outcome events or summary measures                                                                                                                   |
| Main results             | <b>P8</b> 16    | (a) Give unadjusted estimates and, if applicable, confounder-adjusted estimates and their precision (eg, 95% confidence interval). Make clear which confounders were adjusted for and why they were included<br>(b) Report category boundaries when continuous variables were categorized<br>(c) If relevant, consider translating estimates of relative risk into absolute risk for a meaningful time period |
| Other analyses           | 17              | Report other analyses done—eg analyses of subgroups and interactions, and sensitivity analyses                                                                                                                                                                                                                                                                                                                |
| <b>Discussion</b>        |                 |                                                                                                                                                                                                                                                                                                                                                                                                               |
| Key results              | <b>P11</b> 18   | Summarise key results with reference to study objectives                                                                                                                                                                                                                                                                                                                                                      |
| Limitations              | <b>P3,11</b> 19 | Discuss limitations of the study, taking into account sources of potential bias or imprecision. Discuss both direction and magnitude of any potential bias                                                                                                                                                                                                                                                    |
| Interpretation           | <b>P3</b> 20    | Give a cautious overall interpretation of results considering objectives, limitations, multiplicity of analyses, results from similar studies, and other relevant evidence                                                                                                                                                                                                                                    |
| Generalisability         | 21              | Discuss the generalisability (external validity) of the study results                                                                                                                                                                                                                                                                                                                                         |
| <b>Other information</b> |                 |                                                                                                                                                                                                                                                                                                                                                                                                               |
| Funding                  | <b>P11</b> 22   | Give the source of funding and the role of the funders for the present study and, if applicable, for the original study on which the present article is based                                                                                                                                                                                                                                                 |

\*Give information separately for cases and controls in case-control studies and, if applicable, for exposed and unexposed groups in cohort and cross-sectional studies.

**Note:** An Explanation and Elaboration article discusses each checklist item and gives methodological background and published examples of transparent reporting. The STROBE checklist is best used in conjunction with this article (freely available on the Web sites of PLoS Medicine at <http://www.plosmedicine.org/>, Annals of Internal Medicine at <http://www.annals.org/>, and Epidemiology at <http://www.epidem.com/>). Information on the STROBE Initiative is available at [www.strobe-statement.org](http://www.strobe-statement.org).

**Zheng-jun LIU**  
**2018/02/09**

# BMJ Open

## Using competing risk and multistate model to estimate the impact of nosocomial infection on length of stay and mortality in burn patients in Southeast China

|                                 |                                                                                                                                                                                                                                                                            |
|---------------------------------|----------------------------------------------------------------------------------------------------------------------------------------------------------------------------------------------------------------------------------------------------------------------------|
| Journal:                        | <i>BMJ Open</i>                                                                                                                                                                                                                                                            |
| Manuscript ID                   | bmjopen-2017-020527.R2                                                                                                                                                                                                                                                     |
| Article Type:                   | Research                                                                                                                                                                                                                                                                   |
| Date Submitted by the Author:   | 05-May-2018                                                                                                                                                                                                                                                                |
| Complete List of Authors:       | GUO, Hai-lei; Department of Burns Surgery<br>ZHAO, Guang-ju; Emergency Department<br>LING, Xiang-wei ; Department of Burns Surgery<br>XU, Jian-jun; Department of Burns Surgery<br>LU, Cai-jiao; Department of Burns Surgery<br>LIU, zhengjun; Department of Burns Surgery |
| <b>Primary Subject Heading</b>: | Infectious diseases                                                                                                                                                                                                                                                        |
| Secondary Subject Heading:      | Epidemiology                                                                                                                                                                                                                                                               |
| Keywords:                       | burn, nosocomial infection, length of stay, mortality, multi-state model                                                                                                                                                                                                   |
|                                 |                                                                                                                                                                                                                                                                            |

SCHOLARONE™  
Manuscripts

1  
2  
3 **Using competing risk and multistate model to estimate the impact of nosocomial**  
4 **infection on length of stay and mortality in burn patients in Southeast China**

5 Hai-lei GUO<sup>1</sup>, Guang-ju ZHAO<sup>2</sup>, Xiang-wei LING<sup>1</sup>, Jian-jun XU<sup>1</sup>, Cai-jiao LU<sup>1\*</sup>,  
6  
7  
8 Zheng-jun LIU<sup>1\*</sup>  
9

10  
11  
12 <sup>1</sup>Department of Burns Surgery, The First Affiliated Hospital of Wenzhou Medical  
13 University, Wenzhou 325000, China

14  
15  
16 <sup>2</sup> Emergency Department, The First Affiliated Hospital of Wenzhou Medical  
17 University, Wenzhou 325000, China  
18  
19  
20  
21  
22  
23  
24  
25  
26  
27  
28  
29  
30  
31  
32  
33  
34  
35  
36  
37  
38  
39  
40  
41  
42  
43  
44  
45

46  
47  
48 **\* Corresponding authors:** Zheng-jun LIU, Department of Burns Surgery, The First  
49 Affiliated Hospital of Wenzhou Medical University, Wenzhou 325000, China; Tel:  
50 (+86) 577 55579432; E-mail: zhengjun1227@aliyun.com; Cai-jiao LU, Department  
51 of Burns Surgery, The First Affiliated Hospital of Wenzhou Medical University,  
52 Wenzhou 325000, China; Tel: (+86) 577 :55579433; E-mail: lucaijiao139@163.com  
53  
54  
55  
56  
57  
58  
59  
60



**Abstract:**

**Objective:** Due to the defects in skin barrier function and immune response, burn patients who survive the acute phase of a burn injury are at a high risk of nosocomial infection (NI). The aim of this study is to evaluate the impacts of NI on length of stay (LOS) and hospital mortality in burn patients using a multistate model. **Design and Setting:** A retrospective observational study was conducted in burn unit and intensive care unit (ICU) in the First Affiliated Hospital of Wenzhou Medical University, Wenzhou, China. **Participants:** Data were obtained from 1143 records of patients admitted with burn between 1 January 2013 to 31 December 2016. **Methods:** Risk factors for NIs were determined by binary logistic regression. The extended Cox model with time-varying covariates was used to determine the impact of NIs on hospital mortality, and Cumulative incidence functions (CIF) were calculated. Multiple-linear regression analysis was applied to detect the variables associated with LOS. Using a multi-state model, the extra LOS due to NI were determined. **Results:** 15.8 percent of total burn patients were suffered from NIs and incidence density of NIs was 9.6 per 1000 patient-days. NIs significantly increased the rate of death (hazard ratio: 4.625, CI<sub>95</sub> 2.361~9.062, P<0.001). The cumulative probability of death for patients with NI was greater that for those without NI. The extra LOS due to NIs was 17.68 days (CI<sub>95</sub> 11.31~24.05). **Conclusions:** Using appropriate statistical methods, the present study further illustrated that NIs was associated with the increased cumulative incidence of burn death and increased LOS in burn patients.

**Key words:** burn, nosocomial infection, length of stay, mortality, multi-state model

### Strengths and limitations of this study

1. Using Multi-state and competing risks analysis, the present study assessed the impact of nosocomial infections on hospital mortality and length of stay in burn patients.
2. Some potential factors, such as nursing protocols and the history of immunosuppression drugs, that may be associated with NI, length of stay (LOS) and mortality were not recorded.
3. This study was performed in a single center and the results need to be further confirmed by multiple center trials.

## Introduction

Burn injury, as a common cause of morbidity and mortality, has been recognized as a global public health problem. According to the data from World Health Organization (WHO), burns account for an estimated 300, 000 deaths each year [1]. Previous evidence illustrated that burn shock and inhalation injury were the major cause of early death among patients with burn injury [2,3]. Due to the advance in fluid resuscitation, surgical approach, organ function protection, antibiotic innovation and other adjunct strategies, the early mortality of burn patients decreased dramatically over the last 30 years [4,5]. On the other hand, because of the defects in skin barrier function and immune response, burn patients who survive the acute phase of a burn injury are at a high risk of acquiring nosocomial infection (NI) [6].

It has been reported that about 30-80% of burn patients suffered from NIs [7-9]. Nevertheless, the exact impact of NIs on the LOS and mortality of burn patients remains elusive. Williams *et al* [10] investigated the predominant causes of death in burned pediatric patients. They found that infection is the leading cause of death after burn injury. A recent study reported an incidence density of 14.7 infections/1000 patient days in burn patients and NIs was not the most significant risk factors for mortality [11]. It should be noted that NI is a time-varying factor, and it can develop at any time after admission. Matched-cohort study is the most commonly used method for estimating length of stay (LOS) associated with NIs. However, different matching factors were used in different studies, and it may be difficult to identify appropriate matching factors for NIs [12]. More importantly, the time-dependent characteristics of NIs implies that infection can impact on LOS only after the infection has started [12,13]. So, appropriate statistical methods for estimating the risk of death and LOS due to NI among burn patients would be helpful in making medical decisions and developing policy. Multistate modelling is a method to avoid time-dependent bias, and it is a useful way of describing a process in which a patient moves through a

1  
2  
3 series of states in continuous time [12,13]. The aim of this study was to determine the  
4 impacts of NI on length of stay (LOS) and hospital mortality in burn patients using a  
5 multistate model.  
6  
7

## 8 9 10 **Materials and methods**

### 11 12 **1. Patients**

13  
14  
15 A retrospective study was conducted in burn unit and intensive care unit (ICU) in  
16 the First Affiliated Hospital of Wenzhou Medical University, Wenzhou, China. The  
17 burn unit has 72 beds and there are 50 beds in the ICU. After approval by the  
18 Institutional Review Board of the First Affiliated Hospital of Wenzhou Medical  
19 University, data of total 1143 patients admitted with burn were collected during  
20 January 2013 to December 2016. Inclusion criteria: (1) age of 0-99 years; (2)  
21 admission to hospital no later than 3 days post-burn; (3) LOS>48 hours. As the  
22 present study was an observational and retrospective study, informed consent was  
23 waived by the Medical Ethics Committee.  
24  
25  
26  
27  
28  
29  
30  
31

### 32 **2. Data collection**

33  
34 NI in burn patients was defined as infection occurring 48 hours after hospital  
35 admission. There were four main types of NIs (burn wound infection, bloodstream  
36 infection, pneumonia, urinary tract infection) according to the criteria of the Centers  
37 for Disease Control and Prevention (CDC) [14]. A case of burn wound infection was  
38 defined as a patient has change in burn wound appearance or character or patient with  
39 a burn has at least two of the following without other recognized cause: fever  
40 [Temperature (T) >38°C], hypothermia (T<36°C), hypotension, oliguria (<20 cm<sup>2</sup>/hr),  
41 hyperglycemia at previously tolerated levels of dietary carbohydrate, or mental  
42 confusion, in which histologic examination of burn biopsy shows invasion of  
43 organisms into adjacent viable tissue. Bloodstream infection (BSI) includes  
44 laboratory-confirmed BSI and clinical sepsis. Patient with laboratory-confirmed BSI  
45 must have a recognized pathogen cultured from one or more blood cultures and  
46 organism cultured from blood is not related to an infection at another site. Clinical  
47  
48  
49  
50  
51  
52  
53  
54  
55  
56  
57  
58  
59  
60

1  
2  
3 sepsis must meet the following clinical signs or symptoms with no other recognized  
4 cause: Fever ( $T > 38^{\circ}\text{C}$ ), hypotension (systolic pressure  $\leq 90$  mm Hg), or oliguria ( $< 20$   
5  $\text{cm}^3/\text{h}$ ); blood culture not done or no organisms or antigen detected in blood; and no  
6  
7 apparent infection at another site and physician instituted treatment for sepsis. Patients  
8  
9 had rales or dullness to percussion on physical examination of the chest or a chest  
10  
11 radiographic examination that showed new or progressive infiltrate or consolidation,  
12  
13 cavitation, or pleural effusion and new onset of purulent sputum or change in  
14  
15 character of sputum were diagnosed with pneumonia. Finally, urinary tract infection  
16  
17 patient with the following signs or symptoms with no other recognizable cause: fever  
18  
19 ( $T > 38^{\circ}\text{C}$ ), urgency, frequency, dysuria, or suprapubic tenderness; and at least one of  
20  
21 the following: 1) positive dipstick for leukocyte esterase and/or nitrate; 2) positive  
22  
23 urine microscopy or urine culture.  
24

25  
26 Patients with a history of smoke or fire exposure in a closed space or  
27  
28 maxillofacial burn were suspected to have inhalation injury. The diagnosis of  
29  
30 inhalation injury was made if the suspected patients had physical findings including  
31  
32 changes in voice and carbonaceous sputum production, or had bronchoscopic  
33  
34 evidence [15].

35  
36 The characteristics of NI including time, site and pathogen were recorded. For  
37  
38 patients with NI at the same site, only the first episode of it was analyzed. the  
39  
40 potential factors which are associated with NIs, LOS and mortality were collected,  
41  
42 including gender, age, history of diabetes, date of admission, burn types (flame,  
43  
44 scalding, electric and others), burn size and depth and inhalation injury [7-9].  
45  
46 Additionally, the dates of discharge and death.

### 47 **3. Management**

48  
49 Resuscitation were performed according to the modified Evans (Ruijin) formula  
50  
51 as described by previous paper [16,17]. Dressings were changed every 1-3 days by  
52  
53 doctors. Silver sulfadiazine were applied on deep partial-thickness and full-thickness  
54  
55 burns. For full-thickness burns, early surgical excision of burn eschar and biological  
56  
57 closure were performed when the patients' condition permits. Prophylactic antibiotic  
58  
59

1  
2  
3 therapy was performed in patients who needing surgical intervention (perioperative  
4 period of debridement or auto skin grafting) or requiring mechanical ventilation. The  
5 strategy of Prophylactic antibiotic therapy was mainly based on the advice of doctors  
6 from the department of microbiology and infectious diseases and the previous  
7 antibiotic susceptibility pattern of the center. Additionally, patients met CDC criteria  
8 or with identified pathogens were treated with antibiotics and adjusted according to  
9 the results of isolate's susceptibility.  
10  
11  
12  
13  
14  
15

#### 16 **4. Statistical analysis**

17  
18 Data are presented as a percentage of a percentage of total or interquartile ranges  
19 (25<sup>th</sup> and 75<sup>th</sup> percentiles), as appropriate. Mann-Whitney U test is used to analysis  
20 continuous variables while categorical variables were analyzed by the Chi-square test.  
21 Univariate analysis was performed to assess the potential variables associated with NI  
22 and hospital mortality. Variables included in the univariate analysis were age, sex,  
23 diabetes, burn types (flame, scalding, electric and others), TBSA (<10%, 10-29%,  
24 ≥30%), full thickness of burn, and inhalation injury. The variables with p-value less  
25 than 0.05 were used for further analysis. Cox model were used to determine the risk  
26 factors for NI and death. In Cox model, NI was modeled as a time-varying covariate  
27 by the 'survival' package in R. Cumulative incidence functions were calculated by the  
28 "cmprsk" package. Additionally, linear regression analysis was applied to detect the  
29 variables associated with hospital LOS. The 'etm' package in R was performed to  
30 calculate the difference in length of stay between patients with and without NI. There  
31 are four states in our multistate model: admission (state 0), NI (state 1), discharge  
32 alive (state 2) and death (state 3). After admission, patients with NIs move from state  
33 0 into state 1, then into state 2 or state 3, while non-infected patients directly move  
34 from state 0 into state 2 or state 3. The detail information about this multistate model  
35 were shown in Figure 1. R 3.4.1 software and SPSS 18.0 were used to prepare and  
36 analysis the data. Statistical significance was expressed as both p values and 95%  
37 confidence intervals (CI<sub>95</sub>). A two-sided p-value <0.05 was considered statistically  
38 significant.  
39  
40  
41  
42  
43  
44  
45  
46  
47  
48  
49  
50  
51  
52  
53  
54  
55  
56

## 5. Patient and public involvement

No patients were involved in developing the hypothesis or research questions. No patients were involved in the development of the outcome measures. No patients were involved in developing plans for design or implementation of the study. There are no plans to disseminate the results of the research to study participants.

### Results:

#### 1. Patient characteristics

During the study period, a total of 1143 burn patients were admitted to the hospital. 157 burn patients were ineligible by exclusion criteria, and 986 patients were included in the final analysis. Demographic and burn-related characteristics are shown in Table 1. 65.1 percent of the patients were men and 34.9% were women. The median age was 37 (interquartile range [IQR], 18-49) years and 7.1% were elderly patients (65 years and older). 47.6% of the patients had < 10% TBSA burn, 30.8% had 10-29% TBSA burn, and 21.6% of burn patients with TBSA more than 30%. The main burn type is flame (78.2%), followed by scalding (9.7%), electric (7.4%) and other types (4.7%). There were 46 (4.7%) patients had inhalation injury. The hospital mortality was 5.5% (54/986) and the median length of hospital stay was 14 (IQR 8-28).

#### 2. Characteristics of NIs

156 burn patients had 209 NIs, and the median time from admission to the NI was 7 days (IQR 5-10). Over all NI rate was 9.6 per 1000 patient-days. Among all NIs, burn wound infection (BWI) was the most frequent infection (45.9%), followed by blood stream infection (BSI) (24.8%), pneumonia (23.4%) and urinary tract infection (UTI) (5.7%) (Fig.2A). As shown in Fig.2B, a total 237 microorganisms were isolated. The most common pathogens was *Acinetobacter baumannii* (30.8%), followed by *Pseudomonas aeruginosa* (21.5%), *klebsiella pneumoniae* (16.9%) and *Staphylococcus spp* (11%) (Fig.2B).

Univariate analysis indicated that there were significant differences in age, diabetes, TBSA<10%, TBSA≥30%, full thickness burn, inhalation injury and LOS

1  
2  
3 between burn patients with and without NIs (Table 1). Using a Cox regression model,  
4 there was a statistically significant increased odds ratio for NI in patients with age  
5 (HR 1.014; CI<sub>95</sub> 1.005-1.022, P<0.01), full thickness burn (HR 1.702; CI<sub>95</sub>  
6 1.218~2.378, p<0.01) and inhalation injury (OR 3.202; CI<sub>95</sub> 2.091~4.903, p<0.001)  
7 (Table 2).  
8  
9  
10  
11

### 12 **3. Impact of NIs on hospital death of burn patients**

13  
14 As shown in Table 1, the hospital mortality of patients with and without NI were  
15 16.0% and 3.5%, respectively. Univariate analysis indicated that the hospital mortality  
16 of patients with NIs were higher than those without NIs (Table S1). Using a Cox  
17 regression model with NI modeled as a time-varying covariate, we found the risk of  
18 hospital death for patients with NI was 5.92 times higher than that for patients without  
19 it (CI<sub>95</sub> 3.098~11.31, P<0.001). After adjusting for age, gender, TBSA and inhalation  
20 injury, the risk of hospital death for patients with NI was 4.625 times higher than for  
21 patients without NI (CI<sub>95</sub> 2.361~9.062, P<0.001) (Table 2, Table S1). Cumulative  
22 incidence functions for death were shown in Fig 3A. The cumulative probability of  
23 discharge was consistently lesser for an infected patient (left panel). As shown in Fig  
24 3B, the cumulative probability of death for a patient with NI was greater than for a  
25 patient without NI (right panel).  
26  
27  
28  
29  
30  
31  
32  
33  
34  
35

### 36 **4. Extra length of stay**

37  
38 As shown in Fig.1, the median LOS for patients without NI was 13 days (IQR  
39 7-24). For patients with NI, the median LOS was 27 days (IQR 13.25-57.75). Because  
40 the LOS distribution is positively skewed, the logarithm (base 10) of LOS was used as  
41 the response variable in multiple linear regressions. Based on the results of multiple  
42 linear regressions, NI was associated with LOS in burn patients. Other variables  
43 associated with LOS were TBSA, electric burn, flame burn, full thickness (Table 3).  
44 Using a multi-state model, the extra length of stay due to NI was 17.68 days [CI<sub>95</sub>  
45 11.31~24.05, standard error (SE): 3.25, P<0.001] (Fig. 4).  
46  
47  
48  
49  
50  
51  
52  
53

### 54 **Discussion:**



1  
2  
3 Burn patients are at high risk for local and systemic infections. Although  
4 infection control program has been performed in most burn centers and hospitals, the  
5 incidence of NI remains high. Alp E et al. reported 11 percent of burn patients were  
6 suffered from NI and incidence density was 14.7 per 1000 patient days [11]. Recently,  
7 a prospective cohort study was conducted in six major US burn centers to determine  
8 the association between burn size and the morbidity and mortality of burns. It found  
9 that, in patients who have > 20% TBSA burn and need for surgical intervention, the  
10 incidence of NI was 70% [18]. In the present study, incidence density of NI was 9.6  
11 per 1000 patient days which was less than that reported by Alp E et al. and Jeschke  
12 MG et al. BWI was the most common infections in our burn center. *A. baumannii* and  
13 *P. aeruginosa* accounted for about 50% of total isolates, and *A. baumannii* was the  
14 predominant pathogen. Previously study illustrated that *A. baumannii* was the most  
15 common Gram-negative pathogen in burn patients [9]. According to the data  
16 published by Alp E et al [11], 57% of isolates from burns was *A. baumannii* in 2009.  
17 Nowadays, *A. baumannii* has emerged as an important pathogen causing NIs in China.  
18 Rigorous antibiotic stewardship and infection control measures were applied to  
19 prevent the spread of *A. baumannii* infections [19].

20  
21  
22  
23  
24  
25  
26  
27  
28  
29  
30  
31  
32  
33  
34  
35  
36  
37  
38  
39  
40  
41  
42  
43  
44  
45  
46  
47  
48  
49  
50  
51  
52  
53  
54  
55  
56  
57  
58  
59  
60  
Many factors contribute to NIs in burns, including burn injury induced  
immunosuppression [6-9]. Clinical and experimental evidence illustrated that severe  
systemic inflammation after burn injuries can lead to a compensatory  
anti-inflammatory response, which is characterized by decreased number of T helper  
lymphocytes, increased suppressive activity of Foxp3+T cells as well as elevated  
levels of anti-inflammatory cytokines [20-22]. Declines in immune function with age  
make the elderly more susceptible to infections [12,23]. The present study showed  
that burn patients older than 65 years were more susceptible to NI. Similar to the  
previous reports, full thickness burn and inhalation injury were observed to be  
associated with NI [8,9,11].

The most notable finding in this study was the association between NIs and hospital  
mortality in burn patients. It has been reported that, in patients with more than 40%

1  
2  
3 TBSA, over 70% of deaths were related to sepsis resulting from BWIs and other  
4 infection complications [6,8,9,11,24]. Nevertheless, some evidence illustrated that NIs  
5 were not the main cause of death in overall burn patients. The different severity of  
6 burn injury and statistical method may contribute to the different results. In the  
7 present study, NI was modeled as a time-varying factor in a competing risk model.  
8 The results illustrated that the risk of hospital death for burns with NI was 4.625 times  
9 higher than that for non-infected patients, and the cumulative probability of  
10 discharge was consistently lesser for an infected patient. Burn size was the strongest  
11 predictor of mortality in burns, as illustrated by previous studies [18, 25-26]. In the  
12 present study, we found that TBSA is a risk factor for hospital death in burn patients.  
13 Inhalation injury usually cause pulmonary and systemic complications which greatly  
14 increases the risk of death after burn and the results of our study confirmed this  
15 [25-26].

16  
17  
18 The association between NI and LOS has been illustrated by many studies. The  
19 median LOS was about 2-fold higher in trauma patients with NI compared with  
20 patients without infection [27]. Among patients with critical illness, NI increased the  
21 LOS by approximately 18 days per patients [28]. NI after burn has been considered as  
22 a risk factor for prolonged LOS. Shupp JW et al. reported that BSI was associated  
23 with longer hospital LOS in burn patients [26]. Nevertheless, there were no studies to  
24 assess the exact impact of NIs on LOS in burns. Additionally, the time-dependent  
25 nature of NIs implies that infection can impact on LOS only after the infection has  
26 started. While analyzing the impact of NIs on LOS, the duration of hospitalization  
27 prior to the NIs should be considered . So, a multistate model was used in the present  
28 study to estimation of extra LOS caused by NI. We found that the extra length of stay  
29 due to NI in burn patients was 17.68 days.

30  
31  
32 There are some limitations in the present study. First, efforts used to prevent NI,  
33 such as antibiotic treatment and surgery, may have been started before the diagnosis  
34 was made. So, our assessment of the impact of NI on LOS and hospital mortality  
35 should be regarded as a lower estimate. Second, as an observational and retrospective

1  
2  
3 study, some potential factors, such as nursing protocols and the use of anti-peptic  
4 ulcer or immunosuppression drugs, that may be associated with NIs, LOS and death  
5 were not available. Additionally, factors, including mechanical ventilation and  
6 application of antibiotics, may also influence the incidence of NIs. These factors need  
7 to be taken into consideration in the prospective studies. Additionally, the present  
8 study was performed in a single center and the results need to be further confirmed by  
9 multiple center trials.

### 16 **Conclusion:**

17  
18 The present study provided additional information about the impact of NI on  
19 LOS and hospital mortality in burn patients. Using competing risk and multistate  
20 model, we found that nosocomial infection was associated with the increased  
21 cumulative incidence of burn death. The expected extra Length of stay due to  
22 nosocomial infections among burn patients was 14.6 days. The model used in the  
23 present study may help to improve the accuracy of estimates of LOS and incidence of  
24 death due to NIs in burns.

### 32 **Funding:**

33  
34 This work was supported by grants from the National Natural Science Foundation  
35 (grant number 81401621) and Wenzhou Municipal Science and Technology Project  
36 (grant numbers Y2013010, 2015KYB239).

### 41 **Conflict of interest:**

42 The authors declare that they have no competing interests

### 46 **Authors' contributions**

47  
48 HLG and ZJL wrote the protocol, participated in the data analysis, and contributed to  
49 writing this manuscript. GJZ, XWL, JJX and CJL collected the data. All authors have  
50 read and approved the final manuscript.

51  
52  
53  
54  
55 **Ethics approval:** Institutional Review Board of the First Affiliated Hospital of

1  
2  
3 Wenzhou Medical University.  
4  
5

6 **Provenance and peer review:** Not commissioned; externally peer reviewed.  
7

8  
9 **Data sharing statement:** No additional data are available.  
10  
11

12  
13  
14  
15 **References:**  
16

- 17  
18 1. Mock C, Peck M, Peden M, Krug E, Eds . A WHO plan for burn prevention and  
19 care. Geneva: World Health Organisation; 2008.  
20  
21 2. Bloemsma GC, Dokter J, Boxma H, Oen IM. Mortality and causes of death in a  
22 burn centre. *Burns* 2008; 34:1103-7.  
23  
24 3. Ryan CM, Schoenfeld DA, Thorpe WP, Sheridan RL, Cassem EH, Tompkins RG.  
25 Objective estimates of the probability of death from burn injuries. *N Engl J Med* 1998;  
26 338:362-6.  
27  
28 4. Tompkins RG. Survival from burns in the new millennium: 70 years' experience  
29 from a single institution. *Ann Surg* 2015; 261:263-8.  
30  
31 5. Tompkins RG, Liang MH, Lee AF, Kazis LE; Multi-Center Benchmarking Study  
32 Working Group. The American Burn Association/Shriners Hospitals for Children  
33 Burn Outcomes Program: a progress report at 15 years. *J Trauma Acute Care Surg*  
34 2012; 73:S173-8.  
35  
36 6. Church D, Elsayed S, Reid O, Winston B, Lindsay R. Burn wound infections. *Clin*  
37 *Microbiol Rev* 2006; 19:403-34.  
38  
39 7. Keen EF 3rd, Robinson BJ, Hospenthal DR, Aldous WK, Wolf SE, Chung KK, et al.  
40 Incidence and bacteriology of burn infections at a military burn center. *Burns* 2010;  
41 36:461-8.  
42  
43 8. Öncül O, Öksüz S, Acar A, İlkür E, Turhan V, Uygur F, et al. Nosocomial infection  
44 characteristics in a burn intensive care unit: analysis of an eleven-year active  
45 surveillance. *Burns* 2014; 40:835-41.  
46  
47  
48  
49  
50  
51  
52  
53  
54  
55  
56  
57

- 1  
2  
3 9. Leseva M, Arguirova M, Nashev D, Zamfirova E, Hadzhyiski O. Nosocomial  
4 infections in burn patients: etiology, antimicrobial resistance, means to control. *Ann*  
5 *Burns Fire Disasters* 2013; 26:5-11.  
6  
7
- 8 10. Williams FN, Herndon DN, Hawkins HK, Lee JO, Cox RA, Kulp GA, et al. The  
9 leading causes of death after burn injury in a single pediatric burn center. *Crit Care*.  
10 2009;13(6):R183.  
11  
12
- 13 11. Alp E, Coruh A, Gunay GK, Yontar Y, Doganay M. Risk factors for nosocomial  
14 infection and mortality in burn patients: 10 years of experience at a university hospital.  
15 *J Burn Care Res* 2012; 33:379-85.  
16  
17
- 18 12. De Angelis G, Murthy A, Beyersmann J, Harbarth S. Estimating the impact of  
19 healthcare-associated infections on length of stay and costs. *Clin Microbiol Infect*.  
20 2010;16:1729-35.  
21  
22
- 23 13. Zhao GJ, Li D, Zhao Q, Song JX, Chen XR, Hong GL, Li MF, et al. Incidence,  
24 risk factors and impact on outcomes of secondary infection in patients with septic  
25 shock: an 8-year retrospective study. *Sci Rep* 2016; 6:38361.  
26  
27
- 28 14. Horan TC, Andrus M, Dudeck MA. CDC/NHSN surveillance definition of health  
29 care-associated infection and criteria for specific types of infections in the acute care  
30 setting. *Am J Infect Control* 2008; 36:309-32  
31  
32
- 33 15. Walker PF, Buehner MF, Wood LA, Boyer NL, Driscoll IR, Lundy JB, et al.  
34 Diagnosis and management of inhalation injury: an updated review. *Crit Care* 2015;  
35 19:351.  
36  
37
- 38 16. Shi Y, Zhang X, Huang BG, Wang WK, Liu Y. Severe burn injury in late  
39 pregnancy: a case report and literature review. *Burns Trauma* 2015;3:2.  
40  
41
- 42 17. Chen Z, Yuan K. Another important factor affecting fluid requirement after severe  
43 burn: a retrospective study of 166 burn patients in Shanghai. *Burns*. 2011; 37:1145-9.  
44  
45
- 46 18. Jeschke MG, Pinto R, Kraft R, Nathens AB, Finnerty CC, Gamelli RL, et al.  
47 Morbidity and survival probability in burn patients in modern burn care. *Crit Care*  
48 *Med* 2015; 43:808-15.  
49  
50
- 51 19. Chen B, He LX, Hu B, Ni YX, Qiu H, Shi Y, et al. Expert Consensus Document  
52  
53  
54  
55  
56

1  
2  
3 on *Acinetobacter baumannii* infection diagnosis, treatment and prevention in China.  
4 *Zhong Hua Yi Xue Za Zhi* 2012; 92:76–85.

5  
6  
7 20. Schwacha MG, Chaudry IH. The cellular basis of post-burn immunosuppression:  
8 macrophages and mediators. *Int J Mol Med* 2002; 10:239-43.

9  
10  
11 21. Parment K, Zetterberg A, Ernerudh J, Bakteman K, Steinwall I, Sjoberg F.  
12 Long-term immunosuppression in burned patients assessed by in vitro neutrophil  
13 oxidative burst (Phagoburst). *Burns* 2007; 33:865-71.

14  
15  
16 22. Huang LF, Yao YM, Dong N, Yu Y, He LX, Sheng ZY. Association between  
17 regulatory T cell activity and sepsis and outcome of severely burned patients: a  
18 prospective, observational study. *Crit Care* 2010; 14:R3.

19  
20  
21 23. Rani M, Schwacha MG. Aging and the pathogenic response to burn. *Aging Dis*  
22 2012; 3:171-80.

23  
24  
25 24. Fitzwater J, Purdue GF, Hunt JL, O'Keefe GE. The risk factors and time course of  
26 sepsis and organ dysfunction after burn trauma. *J Trauma* 2003; 54:959-66.

27  
28  
29 25. Smith DL, Cairns BA, Ramadan F, Dalston JS, Fakhry SM, Rutledge R, et al.  
30 Effect of inhalation injury, burn size, and age on mortality: a study of 1447  
31 consecutive burn patients. *J Trauma* 1994; 37:655-9.

32  
33  
34 26. Li H, Yao Z, Tan J, Zhou J, Li Y, Wu J, et al. Epidemiology and outcome analysis  
35 of 6325 burn patients: a five-year retrospective study in a major burn center in  
36 Southwest China. *Sci Rep* 2017; 7:46066.

37  
38  
39 27. Glance LG, Stone PW, Mukamel DB, Dick AW. Increases in mortality, length of  
40 stay, and cost associated with hospital-acquired infections in trauma patients. *Arch*  
41 *Surg* 2011; 146:794-801.

42  
43  
44 28. Chen YY, Chou YC, Chou P. Impact of nosocomial infection on cost of illness and  
45 length of stay in intensive care units. *Infect Control Hosp Epidemiol* 2005; 26:281-7.

### Figure legends

**Figure.1 Multistate model.** Our model including four states: admission, nosocomial infection, discharge alive and death. After admission, patients may be infected or not, then they may be discharge alive or die.

**Figure.2 Characteristics of nosocomial infections.** BWI: Burn wound infection; BSI: blood stream infection; PI: pulmonary infection; UTI: urinary tract infection.

**Figure.3 Cumulative incidence functions for discharge (A) and death (B) in burn patients.** red lines: nosocomial infection; black lines: no nosocomial infection.

**Figure 4. Extra length of stay in patients without (red line) and with (black line) infection.** LOS: length of stay. NI: nosocomial infection

**Table 1. Demographics and clinical characteristic of burn patients with and without nosocomial infection.**

| <b>Variables</b>                        | <b>Total<br/>n=986</b> | <b>NI<br/>n=156</b> | <b>No-NI<br/>n=830</b> | <b>P value</b>   |
|-----------------------------------------|------------------------|---------------------|------------------------|------------------|
| <b>Male, n(%)</b>                       | 642 (65.1%)            | 105 (64.7%)         | 537 (67.3%)            | 0.530            |
| <b>Age (years), median (25th, 75th)</b> | 37 (18,49)             | 37 (17,49)          | 37 (24,37)             | 0.470            |
| <b>Diabetes, n (%)</b>                  | 38 (3.9%)              | 11 (7.1%)           | 27 (3.3%)              | <b>0.024</b>     |
| <b>TBSA, n (%)</b>                      |                        |                     |                        |                  |
| <10%                                    | 469 (47.6%)            | 55 (35.3%)          | 414 (49.9%)            | <b>0.031</b>     |
| 10-29%                                  | 304 (30.8%)            | 38 (24.4%)          | 266 (32.0%)            | 0.056            |
| ≥30%                                    | 213(21.6%)             | 63 (40.3%)          | 150 (18.1%)            | <b>&lt;0.001</b> |
| <b>Full thickness burn, n (%)</b>       | 221 (22.4%)            | 60 (38.5%)          | 161 (19.4%)            | <b>&lt;0.001</b> |
| <b>Inhalation injury, n (%)</b>         | 46 (4.7%)              | 38 (24.3%)          | 8 (1.0%)               | <b>&lt;0.001</b> |
| <b>Burn type, n (%)</b>                 |                        |                     |                        |                  |
| flame                                   | 771 (78.2%)            | 118 (75.6%)         | 653 (84.7%)            | 0.4              |
| scalding                                | 96 (9.7%)              | 11 (7.1%)           | 85 (10.2%)             | 0.218            |
| electric                                | 73 (7.4%)              | 15 (9.6%)           | 58 (7.0%)              | 0.25             |
| others                                  | 46 (4.7%)              | 12 (7.7%)           | 34 (4.1%)              | 0.051            |
| <b>Length of hospital stay</b>          |                        |                     |                        |                  |
| median (25th, 75th)                     | 14 (8, 28)             | 27 (13.25, 57.75)   | 13 (7, 24)             | <b>&lt;0.001</b> |
| <b>In-hospital mortality, n (%)</b>     | 54 (5.5%)              | 25 16.0             | 29 3.5                 | <b>&lt;0.001</b> |



1  
2  
3  
4  
5  
6  
7 NI: nosocomial infection; TBSA: total body surface area  
8  
9  
10  
11  
12  
13  
14  
15  
16  
17  
18  
19  
20  
21  
22  
23  
24  
25  
26  
27  
28  
29  
30  
31  
32  
33  
34  
35  
36  
37  
38  
39  
40  
41  
42  
43  
44  
45  
46  
47

For peer review only

**Table.2 Results of the Cox-proportional hazard analysis of nosocomial infection and hospital death**

| Outcomes | Variables            | HR    | CI <sub>95</sub> | P value |
|----------|----------------------|-------|------------------|---------|
| NI       | Age                  | 1.014 | 1.005 ~1.022     | <0.01   |
|          | Full thickness burn  | 1.702 | 1.218~2.378      | <0.01   |
|          | Inhalation injury    | 3.202 | 2.091~4.903      | <0.001  |
| Death    | Nosocomial infection | 4.625 | 2.361~9.062      | <0.001  |
|          | TBSA                 | 1.459 | 1.089~1.955      | <0.05   |
|          | Inhalation injury    | 2.986 | 1.511~5.901      | <0.05   |

NI: nosocomial infection; TBSA: total body surface area; HR: hazard ratio; CI<sub>95</sub>: 95% confidence interval

**Table.3 Results of multiple linear regressions analysis of length of stay (days)**

| Variables            | B     | CI <sub>95</sub> | P value |
|----------------------|-------|------------------|---------|
| TBSA                 | 0.085 | 0.056~0.113      | <0.001  |
| Full thickness burn  | 0.105 | 0.052~0.157      | <0.001  |
| Electric burn        | 0.228 | 0.129~0.328      | <0.001  |
| Flame burn           | 0.093 | 0.031~0.155      | <0.001  |
| Nosocomial infection | 0.244 | 0.184~0.305      | <0.001  |

TBSA: total body surface area; CI<sub>95</sub>: 95% confidence interval

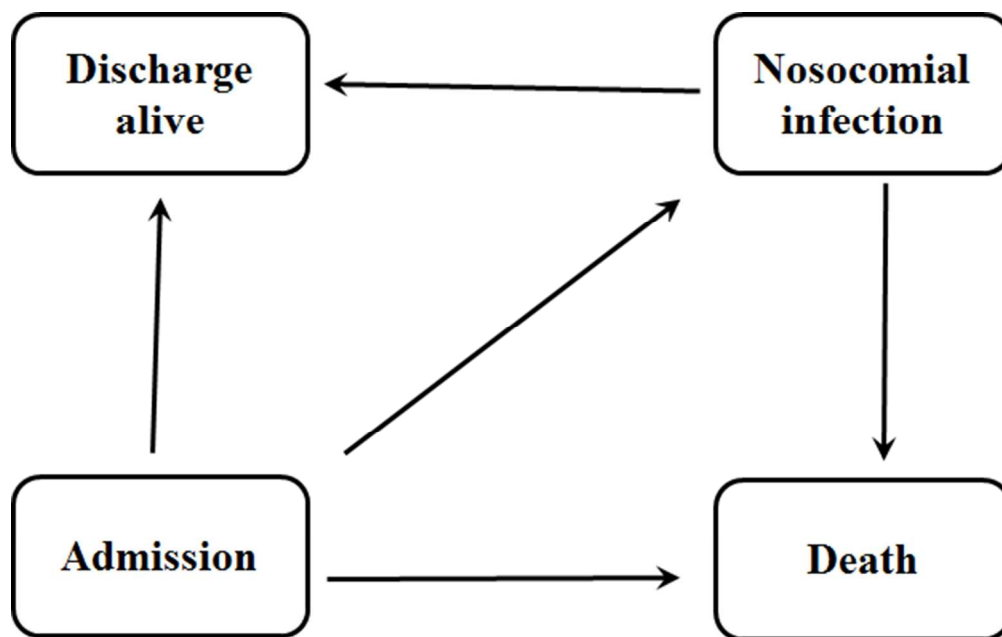

Figure.1 Multistate model.

220x138mm (300 x 300 DPI)

1  
2  
3  
4  
5  
6  
7  
8  
9  
10  
11  
12  
13  
14  
15  
16  
17  
18  
19  
20  
21  
22  
23  
24  
25  
26  
27  
28  
29  
30  
31  
32  
33  
34  
35  
36  
37  
38  
39  
40  
41  
42  
43  
44  
45  
46  
47  
48  
49  
50  
51  
52  
53  
54  
55  
56  
57  
58  
59  
60

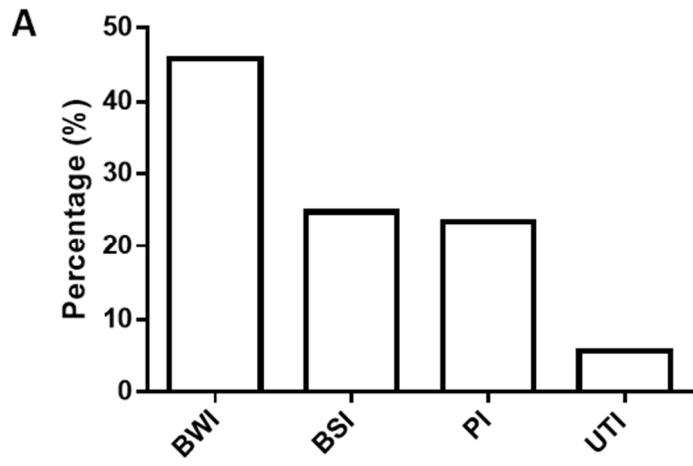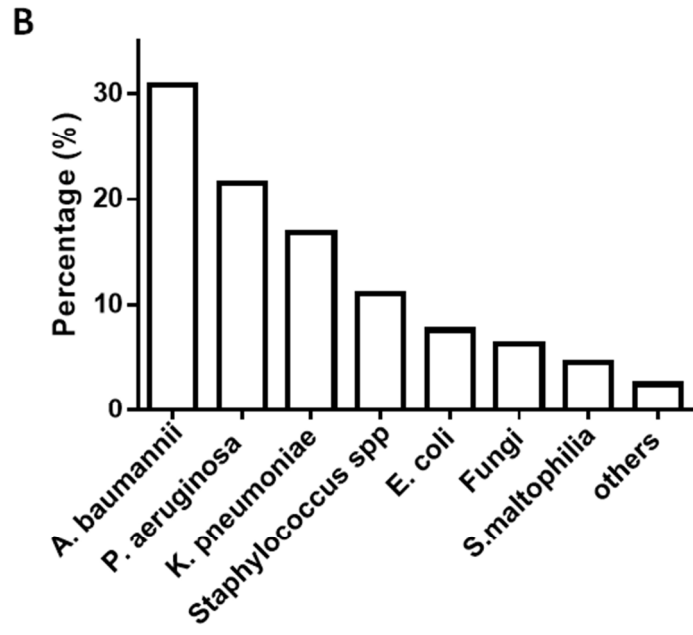

Characteristics of nosocomial infections

195x322mm (300 x 300 DPI)

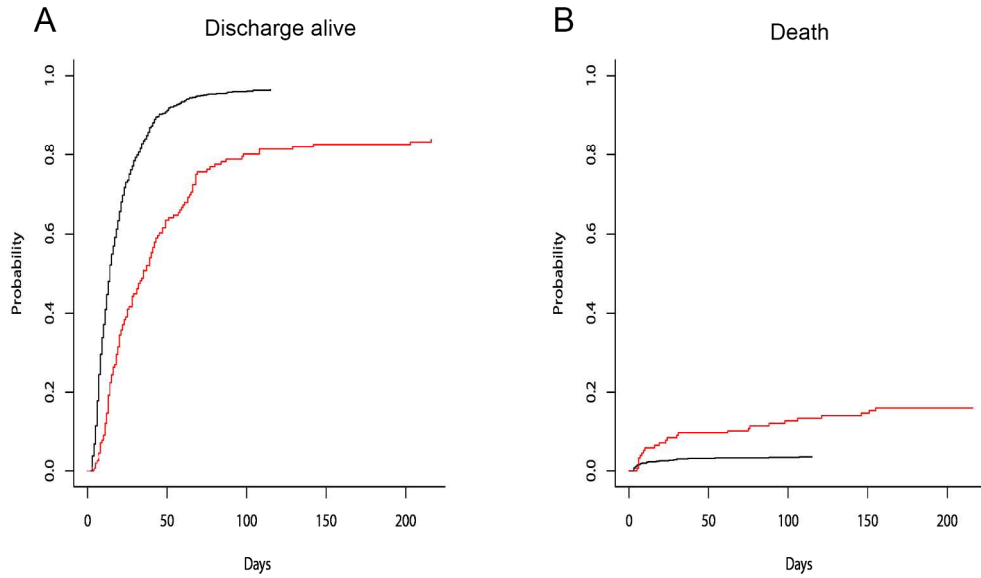

Cumulative incidence functions for discharge (A) and death (B) in burn patients

190x127mm (300 x 300 DPI)

view only

1  
2  
3  
4  
5  
6  
7  
8  
9  
10  
11  
12  
13  
14  
15  
16  
17  
18  
19  
20  
21  
22  
23  
24  
25  
26  
27  
28  
29  
30  
31  
32  
33  
34  
35  
36  
37  
38  
39  
40  
41  
42  
43  
44  
45  
46  
47  
48  
49  
50  
51  
52  
53  
54  
55  
56  
57  
58  
59  
60

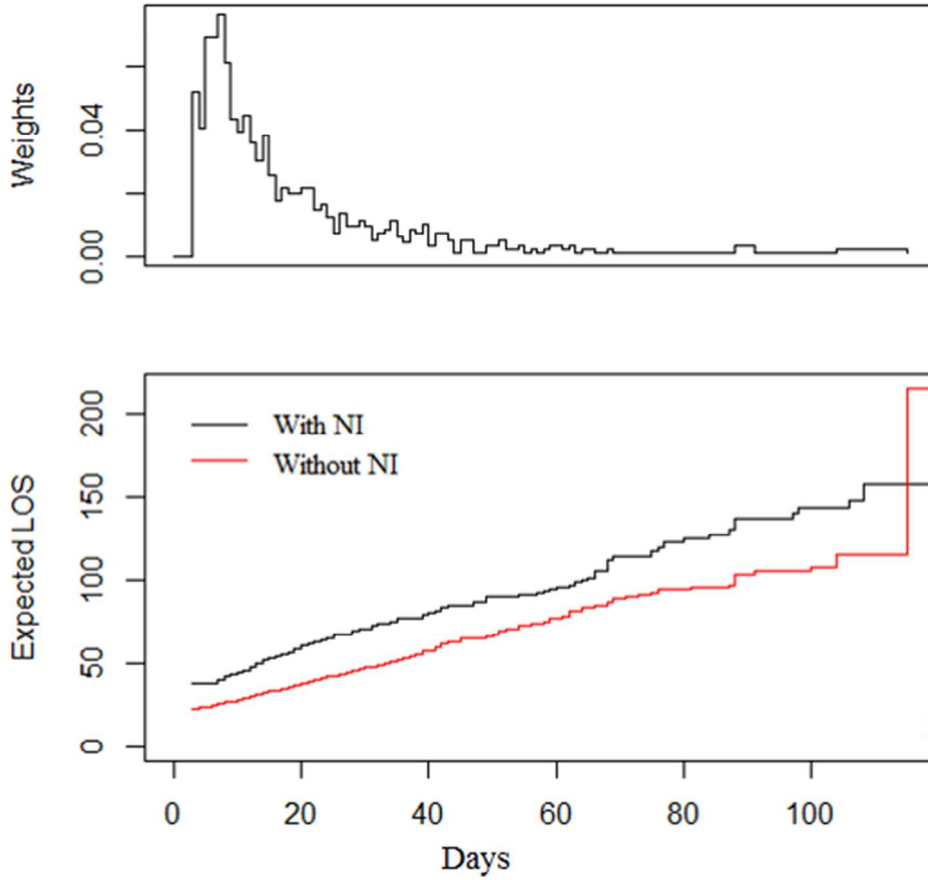

Extra length of stay in patients without (red line) and with (black line) infection.

275x275mm (300 x 300 DPI)

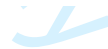

**Table S1. Baseline characteristics of burn patients according to survive or not.**

| <b>Variables</b>                        | <b>Survivors<br/>(n=932)</b> | <b>Non-Survivors<br/>(n=54)</b> | <b>P value</b>   |
|-----------------------------------------|------------------------------|---------------------------------|------------------|
| <b>Male, n(%)</b>                       | 604 (64.8%)                  | 38 (70.4%)                      | 0.405            |
| <b>Age (years), median (25th, 75th)</b> | 37 (18, 49)                  | 40 (24, 50)                     | 0.305            |
| <b>Diabetes, n (%)</b>                  | 36 (3.9%)                    | 2 (3.7%)                        | 0.953            |
| <b>TBSA, n (%)</b>                      |                              |                                 |                  |
| <10%                                    | 464 (49.8%)                  | 5 (9.3%)                        | <b>&lt;0.001</b> |
| 10-29%                                  | 287 (30.8%)                  | 17 (31.5%)                      | 0.915            |
| ≥30%                                    | 181 (19.4%)                  | 32 (59.3%)                      | <b>&lt;0.001</b> |
| <b>Full thickness burn, n (%)</b>       | 208 (22.3%)                  | 13 (24.1%)                      | 0.763            |
| <b>Inhalation injury, n (%)</b>         | 24 (2.6%)                    | 22 (40.7%)                      | <b>&lt;0.001</b> |
| <b>Burn types, n (%)</b>                |                              |                                 |                  |
| Flame                                   | 727 (78.0%)                  | 44 (81.5%)                      | 0.547            |
| Scalding                                | 89 (9.5%)                    | 5 (9.3%)                        | 0.944            |
| Electric                                | 71 (7.6%)                    | 2 (2.7%)                        | 0.285            |
| Others                                  | 43 (4.6%)                    | 3 (5.6%)                        | 0.750            |
| <b>NI, n (%)</b>                        | 131 (14.1%)                  | 25 (46.3%)                      | <b>&lt;0.001</b> |

NI: nosocomial infection; TBSA: total body surface area

## STROBE Statement—checklist of items that should be included in reports of observational studies

|                              | Item No           | Recommendation                                                                                                                                                                                                                                                                                                                                                                                                                                                                                                                                                                                                                                                                                             |
|------------------------------|-------------------|------------------------------------------------------------------------------------------------------------------------------------------------------------------------------------------------------------------------------------------------------------------------------------------------------------------------------------------------------------------------------------------------------------------------------------------------------------------------------------------------------------------------------------------------------------------------------------------------------------------------------------------------------------------------------------------------------------|
| <b>Title and abstract</b>    | <b>P2</b> 1       | (a) Indicate the study's design with a commonly used term in the title or the abstract<br>(b) Provide in the abstract an informative and balanced summary of what was done and what was found                                                                                                                                                                                                                                                                                                                                                                                                                                                                                                              |
| <b>Introduction</b>          |                   |                                                                                                                                                                                                                                                                                                                                                                                                                                                                                                                                                                                                                                                                                                            |
| Background/rationale         | <b>P4</b> 2       | Explain the scientific background and rationale for the investigation being reported                                                                                                                                                                                                                                                                                                                                                                                                                                                                                                                                                                                                                       |
| Objectives                   | <b>P4</b> 3       | State specific objectives, including any prespecified hypotheses                                                                                                                                                                                                                                                                                                                                                                                                                                                                                                                                                                                                                                           |
| <b>Methods</b>               |                   |                                                                                                                                                                                                                                                                                                                                                                                                                                                                                                                                                                                                                                                                                                            |
| Study design                 | <b>P4</b> 4       | Present key elements of study design early in the paper                                                                                                                                                                                                                                                                                                                                                                                                                                                                                                                                                                                                                                                    |
| Setting                      | <b>P4</b> 5       | Describe the setting, locations, and relevant dates, including periods of recruitment, exposure, follow-up, and data collection                                                                                                                                                                                                                                                                                                                                                                                                                                                                                                                                                                            |
| Participants                 | 6                 | (a) <i>Cohort study</i> —Give the eligibility criteria, and the sources and methods of selection of participants. Describe methods of follow-up<br><i>Case-control study</i> —Give the eligibility criteria, and the sources and methods of case ascertainment and control selection. Give the rationale for the choice of cases and controls<br><b>P5</b> <i>Cross-sectional study</i> —Give the eligibility criteria, and the sources and methods of selection of participants<br>(b) <i>Cohort study</i> —For matched studies, give matching criteria and number of exposed and unexposed<br><i>Case-control study</i> —For matched studies, give matching criteria and the number of controls per case |
| Variables                    | <b>P5</b> 7       | Clearly define all outcomes, exposures, predictors, potential confounders, and effect modifiers. Give diagnostic criteria, if applicable                                                                                                                                                                                                                                                                                                                                                                                                                                                                                                                                                                   |
| Data sources/<br>measurement | <b>P5-6</b><br>8* | For each variable of interest, give sources of data and details of methods of assessment (measurement). Describe comparability of assessment methods if there is more than one group                                                                                                                                                                                                                                                                                                                                                                                                                                                                                                                       |
| Bias                         | 9                 | Describe any efforts to address potential sources of bias                                                                                                                                                                                                                                                                                                                                                                                                                                                                                                                                                                                                                                                  |
| Study size                   | 10                | Explain how the study size was arrived at                                                                                                                                                                                                                                                                                                                                                                                                                                                                                                                                                                                                                                                                  |
| Quantitative variables       | <b>P5-6</b><br>11 | Explain how quantitative variables were handled in the analyses. If applicable, describe which groupings were chosen and why                                                                                                                                                                                                                                                                                                                                                                                                                                                                                                                                                                               |
| Statistical methods          | <b>P6-7</b><br>12 | (a) Describe all statistical methods, including those used to control for confounding<br>(b) Describe any methods used to examine subgroups and interactions<br>(c) Explain how missing data were addressed<br>(d) <i>Cohort study</i> —If applicable, explain how loss to follow-up was addressed<br><i>Case-control study</i> —If applicable, explain how matching of cases and controls was addressed<br><i>Cross-sectional study</i> —If applicable, describe analytical methods taking account of sampling strategy<br>(e) Describe any sensitivity analyses                                                                                                                                          |

Continued on next page



| <b>Results</b>           |                 |                                                                                                                                                                                                                                                                                                                                                                                                               |
|--------------------------|-----------------|---------------------------------------------------------------------------------------------------------------------------------------------------------------------------------------------------------------------------------------------------------------------------------------------------------------------------------------------------------------------------------------------------------------|
| Participants             | 13*             | <b>P7</b> (a) Report numbers of individuals at each stage of study—eg numbers potentially eligible, examined for eligibility, confirmed eligible, included in the study, completing follow-up, and analysed<br>(b) Give reasons for non-participation at each stage<br>(c) Consider use of a flow diagram                                                                                                     |
| Descriptive data         | 14*             | <b>P7</b> (a) Give characteristics of study participants (eg demographic, clinical, social) and information on exposures and potential confounders<br>(b) Indicate number of participants with missing data for each variable of interest<br>(c) <i>Cohort study</i> —Summarise follow-up time (eg, average and total amount)                                                                                 |
| Outcome data             | 15*             | <i>Cohort study</i> —Report numbers of outcome events or summary measures over time<br><i>Case-control study</i> —Report numbers in each exposure category, or summary measures of exposure<br><b>P7</b> <i>Cross-sectional study</i> —Report numbers of outcome events or summary measures                                                                                                                   |
| Main results             | <b>P8</b> 16    | (a) Give unadjusted estimates and, if applicable, confounder-adjusted estimates and their precision (eg, 95% confidence interval). Make clear which confounders were adjusted for and why they were included<br>(b) Report category boundaries when continuous variables were categorized<br>(c) If relevant, consider translating estimates of relative risk into absolute risk for a meaningful time period |
| Other analyses           | 17              | Report other analyses done—eg analyses of subgroups and interactions, and sensitivity analyses                                                                                                                                                                                                                                                                                                                |
| <b>Discussion</b>        |                 |                                                                                                                                                                                                                                                                                                                                                                                                               |
| Key results              | <b>P11</b> 18   | Summarise key results with reference to study objectives                                                                                                                                                                                                                                                                                                                                                      |
| Limitations              | <b>P3,11</b> 19 | Discuss limitations of the study, taking into account sources of potential bias or imprecision. Discuss both direction and magnitude of any potential bias                                                                                                                                                                                                                                                    |
| Interpretation           | <b>P3</b> 20    | Give a cautious overall interpretation of results considering objectives, limitations, multiplicity of analyses, results from similar studies, and other relevant evidence                                                                                                                                                                                                                                    |
| Generalisability         | 21              | Discuss the generalisability (external validity) of the study results                                                                                                                                                                                                                                                                                                                                         |
| <b>Other information</b> |                 |                                                                                                                                                                                                                                                                                                                                                                                                               |
| Funding                  | <b>P11</b> 22   | Give the source of funding and the role of the funders for the present study and, if applicable, for the original study on which the present article is based                                                                                                                                                                                                                                                 |

\*Give information separately for cases and controls in case-control studies and, if applicable, for exposed and unexposed groups in cohort and cross-sectional studies.

**Note:** An Explanation and Elaboration article discusses each checklist item and gives methodological background and published examples of transparent reporting. The STROBE checklist is best used in conjunction with this article (freely available on the Web sites of PLoS Medicine at <http://www.plosmedicine.org/>, Annals of Internal Medicine at <http://www.annals.org/>, and Epidemiology at <http://www.epidem.com/>). Information on the STROBE Initiative is available at [www.strobe-statement.org](http://www.strobe-statement.org).

**Zheng-jun LIU**  
2018/02/09

# BMJ Open

## Using competing risk and multistate model to estimate the impact of nosocomial infection on length of stay and mortality in burn patients in Southeast China

|                                 |                                                                                                                                                                                                                                                                            |
|---------------------------------|----------------------------------------------------------------------------------------------------------------------------------------------------------------------------------------------------------------------------------------------------------------------------|
| Journal:                        | <i>BMJ Open</i>                                                                                                                                                                                                                                                            |
| Manuscript ID                   | bmjopen-2017-020527.R3                                                                                                                                                                                                                                                     |
| Article Type:                   | Research                                                                                                                                                                                                                                                                   |
| Date Submitted by the Author:   | 16-Sep-2018                                                                                                                                                                                                                                                                |
| Complete List of Authors:       | GUO, Hai-lei; Department of Burns Surgery<br>ZHAO, Guang-ju; Emergency Department<br>LING, Xiang-wei ; Department of Burns Surgery<br>XU, Jian-jun; Department of Burns Surgery<br>LU, Cai-jiao; Department of Burns Surgery<br>LIU, zhengjun; Department of Burns Surgery |
| <b>Primary Subject Heading</b>: | Infectious diseases                                                                                                                                                                                                                                                        |
| Secondary Subject Heading:      | Epidemiology                                                                                                                                                                                                                                                               |
| Keywords:                       | burn, nosocomial infection, length of stay, mortality, multi-state model                                                                                                                                                                                                   |
|                                 |                                                                                                                                                                                                                                                                            |

SCHOLARONE™  
Manuscripts

1  
2  
3 **Using competing risk and multistate model to estimate the impact of nosocomial**  
4 **infection on length of stay and mortality in burn patients in Southeast China**

5 Hai-lei GUO<sup>1</sup>, Guang-ju ZHAO<sup>2</sup>, Xiang-wei LING<sup>1</sup>, Jian-jun XU<sup>1</sup>, Cai-jiao LU<sup>1\*</sup>,  
6  
7  
8 Zheng-jun LIU<sup>1\*</sup>  
9

10  
11  
12 <sup>1</sup>Department of Burns Surgery, The First Affiliated Hospital of Wenzhou Medical  
13 University, Wenzhou 325000, China

14  
15  
16 <sup>2</sup> Emergency Department, The First Affiliated Hospital of Wenzhou Medical  
17 University, Wenzhou 325000, China  
18  
19  
20  
21  
22  
23  
24  
25  
26  
27  
28  
29  
30  
31  
32  
33  
34  
35  
36  
37  
38  
39  
40  
41  
42  
43  
44  
45  
46

47  
48 **\* Corresponding authors:** Zheng-jun LIU, Department of Burns Surgery, The First  
49 Affiliated Hospital of Wenzhou Medical University, Wenzhou 325000, China; Tel:  
50 (+86) 577 55579432; E-mail: zhengjun1227@aliyun.com; Cai-jiao LU, Department  
51 of Burns Surgery, The First Affiliated Hospital of Wenzhou Medical University,  
52 Wenzhou 325000, China; Tel: (+86) 577 :55579433; E-mail: lucaijiao139@163.com  
53  
54  
55  
56  
57  
58  
59  
60

**Abstract:**

**Objective:** Due to the defects in skin barrier function and immune response, burn patients who survive the acute phase of a burn injury are at a high risk of nosocomial infection (NI). The aim of this study is to evaluate the impacts of NI on length of stay (LOS) and hospital mortality in burn patients using a multistate model. **Design and Setting:** A retrospective observational study was conducted in burn unit and intensive care unit (ICU) in the First Affiliated Hospital of Wenzhou Medical University, Wenzhou, China. **Participants:** Data were obtained from 1143 records of patients admitted with burn between 1 January 2013 to 31 December 2016. **Methods:** Risk factors for NIs were determined by binary logistic regression. The extended Cox model with time-varying covariates was used to determine the impact of NIs on hospital mortality, and Cumulative incidence functions (CIF) were calculated. Multiple-linear regression analysis was applied to detect the variables associated with LOS. Using a multi-state model, the extra LOS due to NI were determined. **Results:** 15.8 percent of total burn patients suffered from NIs and incidence density of NIs was 9.6 per 1000 patient-days. NIs significantly increased the rate of death (hazard ratio: 4.266, CI<sub>95</sub> 2.218~8.208, P=0.000). The cumulative probability of death for patients with NI was greater than for those without NI. The extra LOS due to NIs was 17.68 days (CI<sub>95</sub> 11.31~24.05). **Conclusions:** Using appropriate statistical methods, the present study further illustrated that NIs were associated with the increased cumulative incidence of burn death and increased LOS in burn patients.

**Key words:** burn, nosocomial infection, length of stay, mortality, multi-state model

**Strengths and limitations of this study**

1. Using Multi-state and competing risks analysis, the present study assessed the impact of nosocomial infections on hospital mortality and length of stay in burn patients.
2. Some potential factors, such as nursing protocols and the history of immunosuppression drugs, that may be associated with NI, length of stay (LOS) and mortality were not recorded.
3. This study was performed in a single center and the results need to be further confirmed by multiple center trials.

## Introduction

Burn injury, as a common cause of morbidity and mortality, has been recognized as a global public health problem. According to the data from World Health Organization (WHO), burns account for an estimated 300, 000 deaths each year [1]. Previous evidence illustrated that burn shock and inhalation injury were the major cause of early death among patients with burn injury [2,3]. Due to the advance in fluid resuscitation, surgical approach, organ function protection, antibiotic innovation and other adjunct strategies, the early mortality of burn patients decreased dramatically over the last 30 years [4,5]. On the other hand, because of the defects in skin barrier function and immune response, burn patients who survive the acute phase of a burn injury are at a high risk of acquiring nosocomial infection (NI) [6].

It has been reported that about 30-80% of burn patients suffered from NIs [7-9]. Nevertheless, the exact impact of NIs on the LOS and mortality of burn patients remains elusive. Williams *et al* [10] investigated the predominant causes of death in burned pediatric patients. They found that infection is the leading cause of death after burn injury. A recent study reported an incidence density of 14.7 infections/1000 patient days in burn patients [11]. Nevertheless, the study illustrated that NIs was not a risk factor for mortality, using logistic regression, after adjusting for confound variables [11]. It should be noted that NI is a time-varying factor, and it can develop at any time after admission. Matched-cohort study is the most commonly used method for estimating length of stay (LOS) associated with NIs. However, different matching factors were used in different studies, and it may be difficult to identify appropriate matching factors for NIs [12]. More importantly, the time-dependent characteristics of NIs implies that infection can impact on LOS only after the infection has started [12,13]. So, appropriate statistical methods for estimating the risk of death and LOS due to NI among burn patients would be helpful in making medical decisions and developing policy. Multistate modelling is a method to avoid time-dependent bias,

1  
2  
3 and it is a useful way of describing a process in which a patient moves through a  
4 series of states in continuous time [12,13]. The aim of this study was to determine the  
5 impacts of NI on length of stay (LOS) and hospital mortality in burn patients using a  
6 multistate model.  
7  
8  
9

## 10 11 **Materials and methods**

### 12 13 14 **1. Patients**

15  
16  
17 A retrospective study was conducted in burn unit and intensive care unit (ICU) in  
18 the First Affiliated Hospital of Wenzhou Medical University, Wenzhou, China. The  
19 burn unit has 72 beds and there are 50 beds in the ICU. After approval by the  
20 Institutional Review Board of the First Affiliated Hospital of Wenzhou Medical  
21 University, data of total 1143 patients admitted with burn were collected during  
22 January 2013 to December 2016. Inclusion criteria: (1) age of 0-99 years; (2)  
23 admission to hospital no later than 3 days post-burn; (3) LOS>48 hours. As the  
24 present study was an observational and retrospective study, informed consent was  
25 waived by the Medical Ethics Committee.  
26  
27  
28  
29  
30  
31  
32  
33

### 34 **2. Data collection**

35  
36 NI in burn patients was defined as infection occurring 48 hours after hospital  
37 admission. There were four main types of NIs (burn wound infection, bloodstream  
38 infection, pneumonia, urinary tract infection) according to the criteria of the Centers  
39 for Disease Control and Prevention (CDC) [14]. Briefly, burn wound infection (BWI)  
40 was defined as patient has a change in burn wound appearance, such as rapid eschar  
41 separation; dark brown, black, or violaceous discoloration of eschar, and at least one of  
42 the following: histologic examination of burn biopsy shows invasion of organisms  
43 into adjacent viable tissue or positive blood culture without other identifiable  
44 infection. Bloodstream infection (BSI) includes laboratory-confirmed BSI and clinical  
45 sepsis. Patient with laboratory-confirmed BSI must have a recognized pathogen  
46 cultured from one or more blood cultures and organism cultured from blood is not  
47 related to an infection at another site. Clinical sepsis must meet the following clinical  
48  
49  
50  
51  
52  
53  
54  
55  
56  
57  
58  
59  
60

1  
2  
3 signs or symptoms with no other recognized cause: Fever ( $T > 38^{\circ}\text{C}$ ), hypotension  
4 (systolic pressure  $\leq 90$  mm Hg), or oliguria ( $< 20$  cm<sup>3</sup>/h); blood culture not done or no  
5 organisms or antigen detected in blood; and no apparent infection at another site and  
6 physician instituted treatment for sepsis. Patients had rales or dullness to percussion  
7 on physical examination of the chest or a chest radiographic examination that showed  
8 new or progressive infiltrate or consolidation, cavitation, or pleural effusion and new  
9 onset of purulent sputum or change in character of sputum were diagnosed with  
10 pneumonia. Finally, urinary tract infection patient with the following signs or  
11 symptoms with no other recognizable cause: fever ( $T > 38^{\circ}\text{C}$ ), urgency, frequency,  
12 dysuria, or suprapubic tenderness; and at least one of the following: 1) positive  
13 dipstick for leukocyte esterase and/or nitrate; 2) positive urine microscopy or urine  
14 culture.

15  
16 Patients with a history of smoke or fire exposure in a closed space or  
17 maxillofacial burn were suspected to have inhalation injury. The diagnosis of  
18 inhalation injury was made if the suspected patients had physical findings including  
19 changes in voice and carbonaceous sputum production, or had bronchoscopic  
20 evidence [15].

21  
22 The characteristics of NI including time, site and pathogen were recorded. For  
23 patients with NI at the same site, only the first episode of it was analyzed. the  
24 potential factors which are associated with NIs, LOS and mortality were collected,  
25 including gender, age, history of diabetes, date of admission, burn types (flame,  
26 scalding, electric and others), burn size and depth and inhalation injury [7-9].  
27 Additionally, the dates of discharge and death.

### 28 **3. Management**

29  
30 Resuscitation were performed according to the modified Evans (Ruijin) formula  
31 as described by previous paper [16,17]. Dressings were changed every 1-3 days by  
32 doctors. Silver sulfadiazine were applied on deep partial-thickness and full-thickness  
33 burns. For full-thickness burns, early surgical excision of burn eschar and biological  
34 closure were performed when the patients' condition permits. Prophylactic antibiotic  
35 therapy was performed in patients who needing surgical intervention (perioperative  
36  
37  
38  
39  
40  
41  
42  
43  
44  
45  
46  
47  
48  
49  
50  
51  
52  
53  
54  
55  
56  
57  
58  
59  
60



1  
2  
3 period of debridement or auto skin grafting) or requiring mechanical ventilation. The  
4 strategy of Prophylactic antibiotic therapy was mainly based on the advice of doctors  
5 from the department of microbiology and infectious diseases and the previous  
6 antibiotic susceptibility pattern of the center. Additionally, patients met CDC criteria  
7 were treated with antibiotics. When a pathogen was identified, antibiotics were  
8 adjusted according to the results of isolate's susceptibility. The duration of antibiotics  
9 therapy is decided by the treating physician based on clinical symptoms, blood culture  
10 results as well as other infection markers.  
11  
12  
13  
14  
15  
16  
17

#### 18 **4. Statistical analysis**

19  
20 Data are presented as a percentage of a percentage of total or interquartile ranges  
21 (25<sup>th</sup> and 75<sup>th</sup> percentiles), as appropriate. Mann-Whitney U test is used to analysis  
22 continuous variables while categorical variables were analyzed by the Chi-square test.  
23 Univariate analysis was performed to assess the potential variables associated with NI  
24 and hospital mortality. Variables included in the univariate analysis were age, sex,  
25 diabetes, burn types (flame, scalding, electric and others), TBSA (<10%, 10-29%,  
26 ≥30%), full thickness of burn, and inhalation injury. The variables with p-value less  
27 than 0.05 were used for further analysis. Cox model were used to determine the risk  
28 factors for NI and death. In Cox model, NI was modeled as a time-varying covariate  
29 by the 'survival' package in R. Cumulative incidence functions were calculated by the  
30 "cmprsk" package. Additionally, linear regression analysis was applied to detect the  
31 variables associated with hospital LOS. The 'etm' package in R was performed to  
32 calculate the difference in length of stay between patients with and without NI. The  
33 code used in the present study was available at <https://CRAN.R-project.org/>. There  
34 are four states in our multistate model: admission (state 0), NI (state 1), discharge  
35 alive (state 2) and death (state 3). After admission, patients with NIs move from state  
36 0 into state 1, then into state 2 or state 3, while non-infected patients directly move  
37 from state 0 into state 2 or state 3. The detail information about this multistate model  
38 were shown in Figure 1. R 3.4.1 software and SPSS 18.0 were used to prepare and  
39 analysis the data. Statistical significance was expressed as both p values and 95%  
40 confidence intervals (CI<sub>95</sub>). A two-sided p-value <0.05 was considered statistically  
41  
42  
43  
44  
45  
46  
47  
48  
49  
50  
51  
52  
53  
54  
55  
56  
57  
58  
59  
60

1  
2  
3 significant.

#### 4 5 **5. Patient and public involvement**

6  
7 No patients were involved in developing the hypothesis or research questions. No  
8 patients were involved in the development of the outcome measures. No patients were  
9 involved in developing plans for design or implementation of the study. There are no  
10 plans to disseminate the results of the research to study participants.

#### 11 12 **Results:**

##### 13 14 **1. Patient characteristics**

15  
16 During the study period, a total of 1143 burn patients were admitted to the  
17 hospital. 157 burn patients were ineligible by exclusion criteria, and 986 patients were  
18 included in the final analysis. Demographic and burn-related characteristics are shown  
19 in Table 1. 65.1 percent of the patients were men and 34.9% were women. The  
20 median age was 37 (interquartile range [IQR], 18-49) years and 7.1% were elderly  
21 patients (65 years and older). 47.6% of the patients had < 10% TBSA burn, 30.8% had  
22 10-29% TBSA burn, and 21.6% of burn patients with TBSA more than 30%. The  
23 main burn type is flame (78.2%), followed by scalding (9.7%), electric (7.4%) and  
24 other types (4.7%). There were 46 (4.7%) patients had inhalation injury. The hospital  
25 morality was 5.5% (54/986) and the median length of hospital stay was 14 (IQR 8-  
26 28).

##### 27 28 **2. Characteristics of NIs**

29  
30 156 burn patients had 209 NIs, and the median time from admission to the NI  
31 was 7 days (IQR 5-10). Over all NI rate was 9.6 per 1000 patient-days. Among all  
32 NIs, burn wound infection (BWI) was the most frequent infection (45.9%), followed  
33 by blood stream infection (BSI) (24.8%), pneumonia (23.4%) and urinary tract  
34 infection (UTI) (5.7%) (Fig.2A). As shown in Fig.2B, a total 237 microorganisms  
35 were isolated. The most common pathogens was *Acinetobacter baumannii* (30.8%),  
36 followed by *Pseudomonas aeruginosa* (21.5%), *klebsiella pneumoniae* (16.9%) and  
37 *Staphylococcus spp* (11%) (Fig.2B).

38  
39 Univariate analysis indicated that there were significant differences in diabetes,  
40 TBSA<10%, TBSA≥30%, full thickness burn, inhalation injury and LOS between  
41  
42  
43  
44  
45  
46  
47  
48  
49  
50  
51  
52  
53  
54  
55  
56  
57  
58  
59  
60

burn patients with and without NIs (Table 1). Using a Cox regression model, there was a statistically significant increased odds ratio for NI in patients with full thickness burn (HR 1.799; CI<sub>95</sub> 1.288~2.511, P=0.000) and inhalation injury (OR 3.326; CI<sub>95</sub> 2.169~5.102, p=0.000), TBSA (HR1.189; CI<sub>95</sub> 1.005~1.407, P=0.043) (Table 2).

### 3. Impact of NIs on hospital death of burn patients

As shown in Table 1, the hospital mortality of patients with and without NI were 16.0% and 3.5%, respectively. Univariate analysis indicated that the hospital mortality of patients with NIs were higher than those without NIs (Table S1). Using a Cox regression model with NI modeled as a time-varying covariate, we found the risk of hospital death for patients with NI was 5.92 times higher than that for patients without it (CI<sub>95</sub> 3.098~11.310, P<0.001). After adjusting for age, gender, TBSA and inhalation injury, the risk of hospital death for patients with NI was 4.266 times higher than for patients without NI (CI<sub>95</sub> 2.218~8.208, P=0.000) (Table 3, Table S1). Cumulative incidence functions for death were shown in Fig 3A. The cumulative probability of discharge was consistently lesser for an infected patient (left panel). As shown in Fig 3B, the cumulative probability of death for a patient with NI was greater that for a patient without NI (right panel).

### 4. Extra length of stay

As shown in Fig.1, the median LOS for patients without NI was 13 days (IQR 7-24). For patients with NI, the median LOS was 27 days (IQR 13.25-57.75). Because the LOS distribution is positively skewed, the logarithm (base 10) of LOS was used as the response variable in multiple linear regressions. Based on the results of multiple linear regressions, NI was associated with increased LOS in burn patients. Other variables associated with LOS were TBSA, electric burn, flame burn, full thickness (Table 4). Using a multi-state model, the extra length of stay due to NI was 17.68 days [CI<sub>95</sub> 11.31~24.05, standard error (SE): 3.25, P<0.001] (Fig. 4).

### Discussion:

Burn patients are at high risk for local and systemic infections. Although infection control program has been performed in most burn centers and hospitals, the incidence

1  
2  
3 of NI remains high. Alp E et al. reported 11 percent of burn patients were suffered  
4 from NI and incidence density was 14.7 per 1000 patient days [11]. Recently, a  
5 prospective cohort study was conducted in six major US burn centers to determine the  
6 association between burn size and the morbidity and mortality of burns. It found that,  
7 in patients who have > 20% TBSA burn and need for surgical intervention, the  
8 incidence of NI was 70% [18]. In the present study, incidence density of NI was 9.6  
9 per 1000 patient days which was less than that reported by Alp E et al. and Jeschke  
10 MG et al. BWI was the most common infections in our burn center. *A. baumannii* and  
11 *P. aeruginosa* accounted for about 50% of total isolates, and *A. baumannii* was the  
12 predominant pathogen. Previously study illustrated that *A. baumannii* was the most  
13 common Gram-negative pathogen in burn patients [9]. According to the data  
14 published by Alp E et al [11], 57% of isolates from burns was *A. baumannii* in 2009.  
15 Nowadays, *A. baumannii* has emerged as an important pathogen causing NIs in  
16 China. Rigorous antibiotic stewardship and infection control measures were applied to  
17 prevent the spread of *A. baumannii* infections [19].

18  
19  
20  
21  
22  
23  
24  
25  
26  
27  
28  
29  
30  
31 Many factors contribute to NIs in burns, including burn injury induced  
32 immunosuppression [6-9]. Clinical and experimental evidence illustrated that severe  
33 systemic inflammation after burn injuries can lead to a compensatory anti-  
34 inflammatory response, which is characterized by decreased number of T helper  
35 lymphocytes, increased suppressive activity of regulatory T cells (Tregs) which  
36 specialized for immune suppression, as well as elevated levels of anti-inflammatory  
37 cytokines [20-22]. Inhibition of Tregs attenuates postburn sepsis has been confirmed  
38 by an experimental study [23]. . In addition, we also observed that full thickness burn,  
39 TBSA, and inhalation injury are the risk factors for NIs in burn patients. The most  
40 notable finding in this study was the association between NIs and hospital mortality in  
41 burn patients. It has been reported that, in patients with more than 40% TBSA, over  
42 70% of deaths were related to sepsis resulting from BWIs and other infection  
43 complications [6,8,9,11,24]. Nevertheless, a study illustrated that NI was a risk factor  
44 for mortality in univariate analysis, but it was not found as a risk factor for mortality  
45 in the stepwise forward logistic regression undertaken to control effect of confound  
46  
47  
48  
49  
50  
51  
52  
53  
54  
55  
56  
57  
58  
59  
60

1  
2  
3 variables [11]. The different statistical method may contribute to the different results.  
4  
5 In the present study, NI was modeled as a time-varying factor in a competing risk  
6  
7 model. The results illustrated that the risk of hospital death for burns with NI was  
8  
9 4.266 times higher than that for non-infected patients, and the cumulative probability  
10  
11 of discharge was consistently lesser for an infected patient. Burn size was the  
12  
13 strongest predictor of mortality in burns, as illustrated by previous studies [18, 25-26].  
14  
15 In the present study, we found that TBSA is a risk factor for hospital death in burn  
16  
17 patients. Additionally, inhalation injury usually causes pulmonary and systemic  
18  
19 complications which greatly increases the risk of death after burn and the results of  
20  
21 our study confirmed this [25-26].

22  
23 The association between NI and LOS has been illustrated by many studies. The  
24  
25 median LOS was about 2-fold higher in trauma patients with NI compared with  
26  
27 patients without infection [27]. Among patients with critical illness, NI increased the  
28  
29 LOS by approximately 18 days per patients [28]. NI after burn has been considered as  
30  
31 a risk factor for prolonged LOS. Shupp JW et al. reported that BSI was associated  
32  
33 with longer hospital LOS in burn patients [26]. Nevertheless, there were no studies to  
34  
35 assess the exact impact of NIs on LOS in burns. Additionally, the time-dependent  
36  
37 nature of NIs implies that infection can impact on LOS only after the infection has  
38  
39 started. While analyzing the impact of NIs on LOS, the duration of hospitalization  
40  
41 prior to the NIs should be considered. So, a multistate model was used in the present  
42  
43 study to estimation of extra LOS caused by NI. We found that the extra length of stay  
44  
45 due to NI in burn patients was 17.68 days.

46  
47 There are some limitations in the present study. Initially, efforts used to prevent NI,  
48  
49 such as antibiotic treatment and surgery, may have been started before the diagnosis  
50  
51 was made. So, our assessment of the impact of NI on LOS and hospital mortality  
52  
53 should be regarded as a lower estimate. Second, as an observational and retrospective  
54  
55 study, some potential factors, such as nursing protocols and the use of anti-peptic  
56  
57 ulcer or immunosuppression drugs, that may be associated with NIs, LOS and death  
58  
59 were not available. Furthermore, factors, including mechanical ventilation and  
60  
application of antibiotics, may also influence the incidence of NIs. These factors need

1  
2  
3 to be taken into consideration in the prospective studies. Additionally, the present  
4 study was performed in a single center and the results need to be further confirmed by  
5 multiple center trials. Finally, there were no patients and public involved in this  
6 retrospective observational study. As patients and public involvement (PPI) is  
7 important for a clinical research [29], it needs to be done in the future studies.  
8  
9

### 12 **Conclusion:**

14 The present study provided additional information about the impact of NI on LOS  
15 and hospital mortality in burn patients. Using competing risk and multistate model,  
16 we found that nosocomial infection was associated with the increased cumulative  
17 incidence of burn death. The expected extra Length of stay due to nosocomial  
18 infections among burn patients was 17.68 days. The model used in the present study  
19 may help to improve the accuracy of estimates of LOS and incidence of death due to  
20 NIs in burns.  
21  
22  
23  
24  
25  
26  
27  
28

### 29 **Funding:**

30 This work was supported by grants from the National Natural Science Foundation  
31 (grant number 81401621) and Wenzhou Municipal Science and Technology Project  
32 (grant numbers Y2013010, 2015KYB239).  
33  
34  
35  
36  
37

### 38 **Conflict of interest:**

39 The authors declare that they have no competing interests  
40  
41

### 42 **Authors' contributions**

43 HLG and ZJL wrote the protocol, participated in the data analysis, and contributed to  
44 writing this manuscript. GJZ, XWL, JJX and CJL collected the data. All authors have  
45 read and approved the final manuscript.  
46  
47  
48  
49

50  
51 **Ethics approval:** Institutional Review Board of the First Affiliated Hospital of  
52 Wenzhou Medical University.  
53  
54  
55  
56

1  
2  
3 **Provenance and peer review:** Not commissioned; externally peer reviewed.  
4  
5

6 **Data sharing statement:** No additional data are available.  
7  
8  
9

10  
11 **References:**  
12  
13

- 14  
15 1. Mock C, Peck M, Peden M, Krug E, Eds . A WHO plan for burn prevention and  
16 care. Geneva: World Health Organisation; 2008.
- 17  
18 2. Bloemsma GC, Dokter J, Boxma H, Oen IM. Mortality and causes of death in a  
19 burn centre. *Burns* 2008; 34:1103-7.
- 20  
21 3. Ryan CM, Schoenfeld DA, Thorpe WP, Sheridan RL, Cassem EH, Tompkins RG.  
22 Objective estimates of the probability of death from burn injuries. *N Engl J Med*  
23 1998; 338:362-6.
- 24  
25 4. Tompkins RG. Survival from burns in the new millennium: 70 years' experience  
26 from a single institution. *Ann Surg* 2015; 261:263-8.
- 27  
28 5. Tompkins RG, Liang MH, Lee AF, Kazis LE; Multi-Center Benchmarking Study  
29 Working Group. The American Burn Association/Shriners Hospitals for Children  
30 Burn Outcomes Program: a progress report at 15 years. *J Trauma Acute Care Surg*  
31 2012; 73:S173-8.
- 32  
33 6. Church D, Elsayed S, Reid O, Winston B, Lindsay R. Burn wound infections. *Clin*  
34 *Microbiol Rev* 2006; 19:403-34.
- 35  
36 7. Keen EF 3rd, Robinson BJ, Hospenthal DR, Aldous WK, Wolf SE, Chung KK, et  
37 al. Incidence and bacteriology of burn infections at a military burn center. *Burns*  
38 2010; 36:461-8.
- 39  
40 8. Öncül O, Öksüz S, Acar A, ülkür E, Turhan V, Uygur F, et al. Nosocomial infection  
41 characteristics in a burn intensive care unit: analysis of an eleven-year active  
42 surveillance. *Burns* 2014; 40:835-41.
- 43  
44 9. Leseva M, Arguirova M, Nashev D, Zamfirova E, Hadzhyiski O. Nosocomial  
45 infections in burn patients: etiology, antimicrobial resistance, means to control. *Ann*  
46  
47  
48  
49  
50  
51  
52  
53  
54  
55  
56  
57



1  
2  
3 Burns Fire Disasters 2013; 26:5-11.

4  
5 10. Williams FN, Herndon DN, Hawkins HK, Lee JO, Cox RA, Kulp GA, et al. The  
6 leading causes of death after burn injury in a single pediatric burn center. *Crit Care*.  
7 2009;13(6):R183.

8  
9  
10 11. Alp E, Coruh A, Gunay GK, Yontar Y, Doganay M. Risk factors for nosocomial  
11 infection and mortality in burn patients: 10 years of experience at a university  
12 hospital. *J Burn Care Res* 2012; 33:379-85.

13  
14  
15 12. De Angelis G, Murthy A, Beyersmann J, Harbarth S. Estimating the impact of  
16 healthcare-associated infections on length of stay and costs. *Clin Microbiol Infect*.  
17 2010;16:1729-35.

18  
19  
20 13. Zhao GJ, Li D, Zhao Q, Song JX, Chen XR, Hong GL, Li MF, et al. Incidence,  
21 risk factors and impact on outcomes of secondary infection in patients with septic  
22 shock: an 8-year retrospective study. *Sci Rep* 2016; 6:38361.

23  
24  
25 14. Horan TC, Andrus M, Dudeck MA. CDC/NHSN surveillance definition of health  
26 care-associated infection and criteria for specific types of infections in the acute care  
27 setting. *Am J Infect Control* 2008; 36:309-32

28  
29  
30 15. Walker PF, Buehner MF, Wood LA, Boyer NL, Driscoll IR, Lundy JB, et al.  
31 Diagnosis and management of inhalation injury: an updated review. *Crit Care* 2015;  
32 19:351.

33  
34  
35 16. Shi Y, Zhang X, Huang BG, Wang WK, Liu Y. Severe burn injury in late  
36 pregnancy: a case report and literature review. *Burns Trauma* 2015;3:2.

37  
38  
39 17. Chen Z, Yuan K. Another important factor affecting fluid requirement after severe  
40 burn: a retrospective study of 166 burn patients in Shanghai. *Burns*. 2011; 37:1145-9.

41  
42  
43 18. Jeschke MG, Pinto R, Kraft R, Nathens AB, Finnerty CC, Gamelli RL, et al.  
44 Morbidity and survival probability in burn patients in modern burn care. *Crit Care*  
45 *Med* 2015; 43:808-15.

46  
47  
48 19. Chen B, He LX, Hu B, Ni YX, Qiu H, Shi Y, et al. Expert Consensus Document  
49 on *Acinetobacter baumannii* infection diagnosis, treatment and prevention in China.  
50 *Zhong Hua Yi Xue Za Zhi* 2012; 92:76–85.

51  
52  
53 20. Schwacha MG, Chaudry IH. The cellular basis of post-burn immunosuppression:  
54  
55



1  
2  
3 macrophages and mediators. *Int J Mol Med* 2002; 10:239-43.

4  
5 21. Parment K, Zetterberg A, Ernerudh J, Bakteman K, Steinwall I, Sjoberg F. Long-  
6  
7 term immunosuppression in burned patients assessed by in vitro neutrophil oxidative  
8  
9 burst (Phagoburst). *Burns* 2007; 33:865-71.

10  
11 22. Huang LF, Yao YM, Dong N, Yu Y, He LX, Sheng ZY. Association between  
12  
13 regulatory T cell activity and sepsis and outcome of severely burned patients: a  
14  
15 prospective, observational study. *Crit Care* 2010; 14:R3.

16  
17 23. Liu QY, Yao YM, Yu Y, Dong N, Sheng ZY. Astragalus polysaccharides attenuate  
18  
19 postburn sepsis via inhibiting negative immunoregulation of CD4+ CD25(high) T  
20  
21 cells. *PLoS One* 2011; 6:e19811.

22  
23 24. Fitzwater J, Purdue GF, Hunt JL, O'Keefe GE. The risk factors and time course of  
24  
25 sepsis and organ dysfunction after burn trauma. *J Trauma* 2003; 54:959-66.

26  
27 25. Smith DL, Cairns BA, Ramadan F, Dalston JS, Fakhry SM, Rutledge R, et al.  
28  
29 Effect of inhalation injury, burn size, and age on mortality: a study of 1447  
30  
31 consecutive burn patients. *J Trauma* 1994; 37:655-9.

32  
33 26. Li H, Yao Z, Tan J, Zhou J, Li Y, Wu J, et al. Epidemiology and outcome analysis  
34  
35 of 6325 burn patients: a five-year retrospective study in a major burn center in  
36  
37 Southwest China. *Sci Rep* 2017; 7:46066.

38  
39 27. Glance LG, Stone PW, Mukamel DB, Dick AW. Increases in mortality, length of  
40  
41 stay, and cost associated with hospital-acquired infections in trauma patients. *Arch*  
42  
43 *Surg* 2011; 146:794-801.

44  
45 28. Chen YY, Chou YC, Chou P. Impact of nosocomial infection on cost of illness and  
46  
47 length of stay in intensive care units. *Infect Control Hosp Epidemiol* 2005; 26:281-7.

48  
49 29. Price A, Schroter S, Snow R, Hicks M, Harmston R, Staniszewska S, Parker S,  
50  
51 Richards T. Frequency of reporting on patient and public involvement (PPI) in  
52  
53 research studies published in a general medical journal: a descriptive study. *BMJ*  
54  
55 *Open* 2018; 8:e020452

### Figure legends

**Figure.1 Multistate model.** Our model including four states: admission, nosocomial infection, discharge alive and death. After admission, patients may be infected or not, then they may be discharge alive or die.

**Figure.2 Characteristics of nosocomial infections.** BWI: Burn wound infection; BSI: blood stream infection; PI: pulmonary infection; UTI: urinary tract infection.

**Figure.3 Cumulative incidence functions for discharge (A) and death (B) in burn patients.** red lines: nosocomial infection; black lines: no nosocomial infection.

**Figure 4. Extra length of stay in patients without (red line) and with (black line) infection.** LOS: length of stay. NI: nosocomial infection

**Table 1. Demographics and clinical characteristic of burn patients with and without nosocomial infection.**

| <b>Variables</b>                        | <b>Total<br/>n=986</b> | <b>NI<br/>n=156</b> | <b>No-NI<br/>n=830</b> | <b><i>P</i> value</b> |
|-----------------------------------------|------------------------|---------------------|------------------------|-----------------------|
| <b>Male, n(%)</b>                       | 642 (65.1%)            | 105 (64.7%)         | 537 (67.3%)            | 0.530                 |
| <b>Age (years), median (25th, 75th)</b> | 37 (18,49)             | 37 (17,49)          | 37 (24,37)             | 0.470                 |
| <b>Diabetes, n (%)</b>                  | 38 (3.9%)              | 11 (7.1%)           | 27 (3.3%)              | <b>0.024</b>          |
| <b>TBSA, n (%)</b>                      |                        |                     |                        |                       |
| <10%                                    | 469 (47.6%)            | 55 (35.3%)          | 414 (49.9%)            | <b>0.031</b>          |
| 10-29%                                  | 304 (30.8%)            | 38 (24.4%)          | 266 (32.0%)            | 0.056                 |
| ≥30%                                    | 213(21.6%)             | 63 (40.3%)          | 150 (18.1%)            | <b>0.000</b>          |
| <b>Full thickness burn, n (%)</b>       | 221 (22.4%)            | 60 (38.5%)          | 161 (19.4%)            | <b>0.000</b>          |
| <b>Inhalation injury, n (%)</b>         | 46 (4.7%)              | 38 (24.3%)          | 8 (1.0%)               | <b>0.000</b>          |
| <b>Burn type, n (%)</b>                 |                        |                     |                        |                       |
| flame                                   | 771 (78.2%)            | 118 (75.6%)         | 653 (84.7%)            | 0.400                 |
| scalding                                | 96 (9.7%)              | 11 (7.1%)           | 85 (10.2%)             | 0.218                 |
| electric                                | 73 (7.4%)              | 15 (9.6%)           | 58 (7.0%)              | 0.250                 |
| others                                  | 46 (4.7%)              | 12 (7.7%)           | 34 (4.1%)              | 0.051                 |
| <b>Length of hospital stay</b>          |                        |                     |                        |                       |
| median (25th, 75th)                     | 14 (8, 28)             | 27 (13.25, 57.75)   | 13 (7, 24)             | <b>0.000</b>          |
| <b>In-hospital mortality, n (%)</b>     | 54 (5.5%)              | 25 16.0             | 29 3.5                 | <b>0.000</b>          |

1  
2  
3  
4  
5  
6  
7 NI: nosocomial infection; TBSA: total body surface area  
8  
9  
10  
11  
12  
13  
14  
15  
16  
17  
18  
19  
20  
21  
22  
23  
24  
25  
26  
27  
28  
29  
30  
31  
32  
33  
34  
35  
36  
37  
38  
39  
40  
41  
42  
43  
44  
45  
46  
47

For peer review only

**Table.2 Results of the Cox-proportional hazard analysis of nosocomial infection**

| Variables           | HR    | CI <sub>95</sub> | P value      |
|---------------------|-------|------------------|--------------|
| LOS                 | 1.002 | 0.996~1.007      | 0.547        |
| TBSA                | 1.189 | 1.005~1.407      | <b>0.043</b> |
| Full thickness burn | 1.799 | 1.289~2.511      | <b>0.000</b> |
| Inhalation injury   | 3.326 | 2.169~5.102      | <b>0.000</b> |
| Diabetes            | 1.586 | 0.856~2.939      | 0.143        |

LOS: length of hospital stay; TBSA: total body surface area; HR: hazard ratio; CI<sub>95</sub>: 95% confidence interval

**Table.3 Results of the Cox-proportional hazard analysis of hospital death**

| Variables            | HR    | CI <sub>95</sub> | P value      |
|----------------------|-------|------------------|--------------|
| Nosocomial infection | 4.266 | 2.218~8.208      | <b>0.000</b> |
| TBSA                 | 1.374 | 1.034~1.825      | <b>0.028</b> |
| Inhalation injury    | 2.824 | 1.448~5.508      | <b>0.002</b> |
| age                  | 1.003 | 0.991~1.016      | 0.608        |
| gender               | 1.212 | 0.667~2.201      | 0.528        |

TBSA: total body surface area; HR: hazard ratio; CI<sub>95</sub>: 95% confidence interval

**Table.4 Results of multiple linear regressions analysis of length of stay (days)**

| Variables            | B     | CI <sub>95</sub> | P value |
|----------------------|-------|------------------|---------|
| TBSA                 | 0.085 | 0.056~0.113      | 0.000   |
| Full thickness burn  | 0.105 | 0.052~0.157      | 0.000   |
| Electric burn        | 0.228 | 0.129~0.328      | 0.000   |
| Flame burn           | 0.093 | 0.031~0.155      | 0.003   |
| Nosocomial infection | 0.244 | 0.184~0.305      | 0.000   |

TBSA: total body surface area; CI<sub>95</sub>: 95% confidence interval



Figure.1 Multistate model.

220x138mm (300 x 300 DPI)

1  
2  
3  
4  
5  
6  
7  
8  
9  
10  
11  
12  
13  
14  
15  
16  
17  
18  
19  
20  
21  
22  
23  
24  
25  
26  
27  
28  
29  
30  
31  
32  
33  
34  
35  
36  
37  
38  
39  
40  
41  
42  
43  
44  
45  
46  
47  
48  
49  
50  
51  
52  
53  
54  
55  
56  
57  
58  
59  
60

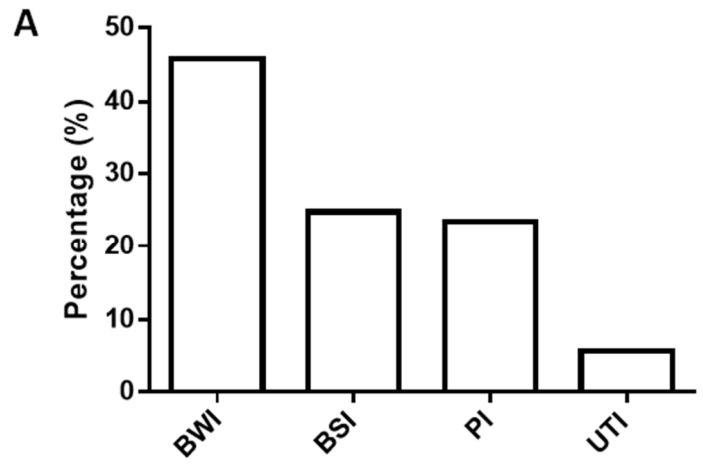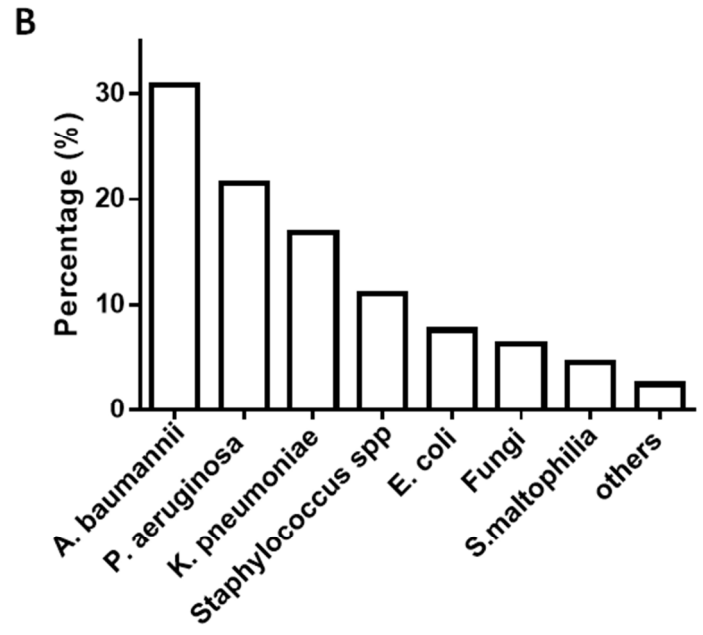

Characteristics of nosocomial infections

195x322mm (300 x 300 DPI)



Cumulative incidence functions for discharge (A) and death (B) in burn patients

190x127mm (300 x 300 DPI)

view only



1  
2  
3  
4  
5  
6  
7  
8  
9  
10  
11  
12  
13  
14  
15  
16  
17  
18  
19  
20  
21  
22  
23  
24  
25  
26  
27  
28  
29  
30  
31  
32  
33  
34  
35  
36  
37  
38  
39  
40  
41  
42  
43  
44  
45  
46  
47  
48  
49  
50  
51  
52  
53  
54  
55  
56  
57  
58  
59  
60

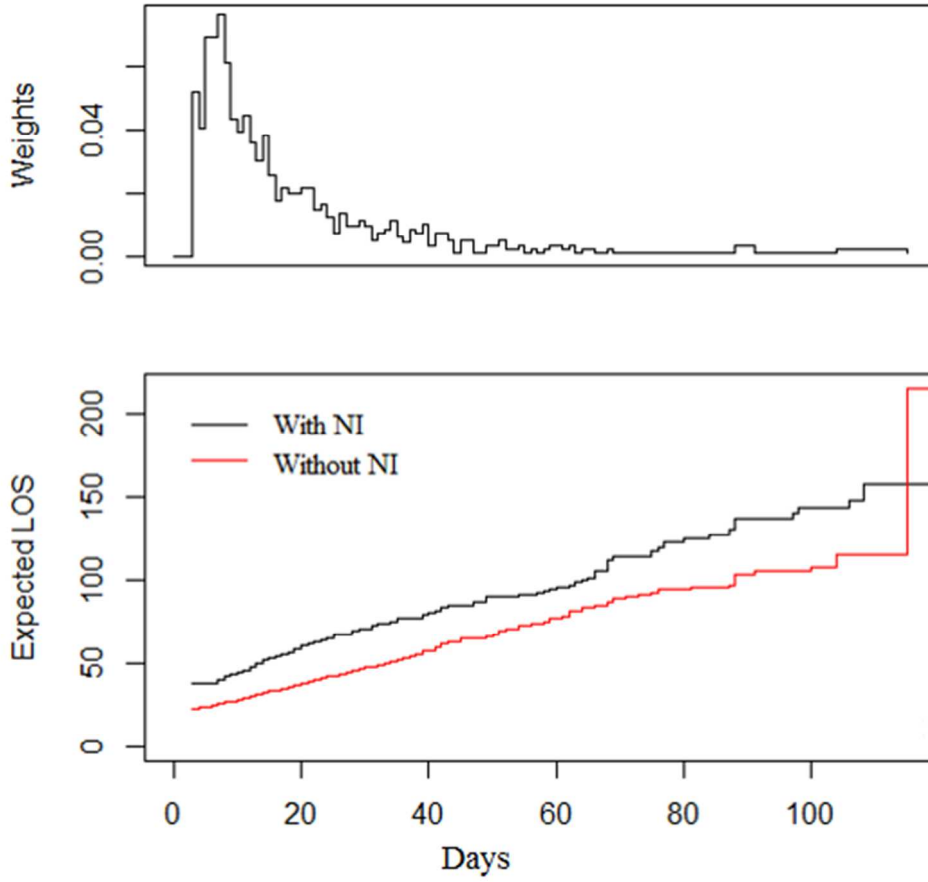

Extra length of stay in patients without (red line) and with (black line) infection.

275x275mm (300 x 300 DPI)



**Table S1. Baseline characteristics of burn patients according to survive or not.**

| <b>Variables</b>                        | <b>Survivors<br/>(n=932)</b> | <b>Non-Survivors<br/>(n=54)</b> | <b>P value</b> |
|-----------------------------------------|------------------------------|---------------------------------|----------------|
| <b>Male, n(%)</b>                       | 604 (64.8%)                  | 38 (70.4%)                      | 0.405          |
| <b>Age (years), median (25th, 75th)</b> | 37 (18, 49)                  | 40 (24, 50)                     | 0.305          |
| <b>Diabetes, n (%)</b>                  | 36 (3.9%)                    | 2 (3.7%)                        | 0.953          |
| <b>TBSA, n (%)</b>                      |                              |                                 |                |
| <10%                                    | 464 (49.8%)                  | 5 (9.3%)                        | <b>0.000</b>   |
| 10-29%                                  | 287 (30.8%)                  | 17 (31.5%)                      | 0.915          |
| ≥30%                                    | 181 (19.4%)                  | 32 (59.3%)                      | <b>0.000</b>   |
| <b>Full thickness burn, n (%)</b>       | 208 (22.3%)                  | 13 (24.1%)                      | 0.763          |
| <b>Inhalation injury, n (%)</b>         | 24 (2.6%)                    | 22 (40.7%)                      | <b>0.000</b>   |
| <b>Burn types, n (%)</b>                |                              |                                 |                |
| Flame                                   | 727 (78.0%)                  | 44 (81.5%)                      | 0.547          |
| Scalding                                | 89 (9.5%)                    | 5 (9.3%)                        | 0.944          |
| Electric                                | 71 (7.6%)                    | 2 (2.7%)                        | 0.285          |
| Others                                  | 43 (4.6%)                    | 3 (5.6%)                        | 0.750          |
| <b>NI, n (%)</b>                        | 131 (14.1%)                  | 25 (46.3%)                      | <b>0.000</b>   |

NI: nosocomial infection; TBSA: total body surface area

## STROBE Statement—checklist of items that should be included in reports of observational studies

|                              | Item No           | Recommendation                                                                                                                                                                                                                                                                                                                                                                                                                                                                                                                                                                                                                                                                                             |
|------------------------------|-------------------|------------------------------------------------------------------------------------------------------------------------------------------------------------------------------------------------------------------------------------------------------------------------------------------------------------------------------------------------------------------------------------------------------------------------------------------------------------------------------------------------------------------------------------------------------------------------------------------------------------------------------------------------------------------------------------------------------------|
| <b>Title and abstract</b>    | <b>P2</b> 1       | (a) Indicate the study's design with a commonly used term in the title or the abstract<br>(b) Provide in the abstract an informative and balanced summary of what was done and what was found                                                                                                                                                                                                                                                                                                                                                                                                                                                                                                              |
| <b>Introduction</b>          |                   |                                                                                                                                                                                                                                                                                                                                                                                                                                                                                                                                                                                                                                                                                                            |
| Background/rationale         | <b>P4</b> 2       | Explain the scientific background and rationale for the investigation being reported                                                                                                                                                                                                                                                                                                                                                                                                                                                                                                                                                                                                                       |
| Objectives                   | <b>P4</b> 3       | State specific objectives, including any prespecified hypotheses                                                                                                                                                                                                                                                                                                                                                                                                                                                                                                                                                                                                                                           |
| <b>Methods</b>               |                   |                                                                                                                                                                                                                                                                                                                                                                                                                                                                                                                                                                                                                                                                                                            |
| Study design                 | <b>P4</b> 4       | Present key elements of study design early in the paper                                                                                                                                                                                                                                                                                                                                                                                                                                                                                                                                                                                                                                                    |
| Setting                      | <b>P4</b> 5       | Describe the setting, locations, and relevant dates, including periods of recruitment, exposure, follow-up, and data collection                                                                                                                                                                                                                                                                                                                                                                                                                                                                                                                                                                            |
| Participants                 | 6                 | (a) <i>Cohort study</i> —Give the eligibility criteria, and the sources and methods of selection of participants. Describe methods of follow-up<br><i>Case-control study</i> —Give the eligibility criteria, and the sources and methods of case ascertainment and control selection. Give the rationale for the choice of cases and controls<br><b>P5</b> <i>Cross-sectional study</i> —Give the eligibility criteria, and the sources and methods of selection of participants<br>(b) <i>Cohort study</i> —For matched studies, give matching criteria and number of exposed and unexposed<br><i>Case-control study</i> —For matched studies, give matching criteria and the number of controls per case |
| Variables                    | <b>P5</b> 7       | Clearly define all outcomes, exposures, predictors, potential confounders, and effect modifiers. Give diagnostic criteria, if applicable                                                                                                                                                                                                                                                                                                                                                                                                                                                                                                                                                                   |
| Data sources/<br>measurement | <b>P5-6</b><br>8* | For each variable of interest, give sources of data and details of methods of assessment (measurement). Describe comparability of assessment methods if there is more than one group                                                                                                                                                                                                                                                                                                                                                                                                                                                                                                                       |
| Bias                         | 9                 | Describe any efforts to address potential sources of bias                                                                                                                                                                                                                                                                                                                                                                                                                                                                                                                                                                                                                                                  |
| Study size                   | 10                | Explain how the study size was arrived at                                                                                                                                                                                                                                                                                                                                                                                                                                                                                                                                                                                                                                                                  |
| Quantitative variables       | <b>P5-6</b><br>11 | Explain how quantitative variables were handled in the analyses. If applicable, describe which groupings were chosen and why                                                                                                                                                                                                                                                                                                                                                                                                                                                                                                                                                                               |
| Statistical methods          | <b>P6-7</b><br>12 | (a) Describe all statistical methods, including those used to control for confounding<br>(b) Describe any methods used to examine subgroups and interactions<br>(c) Explain how missing data were addressed<br>(d) <i>Cohort study</i> —If applicable, explain how loss to follow-up was addressed<br><i>Case-control study</i> —If applicable, explain how matching of cases and controls was addressed<br><i>Cross-sectional study</i> —If applicable, describe analytical methods taking account of sampling strategy<br>(e) Describe any sensitivity analyses                                                                                                                                          |

Continued on next page

| <b>Results</b>           |                 |                                                                                                                                                                                                                                                                                                                                                                                                               |
|--------------------------|-----------------|---------------------------------------------------------------------------------------------------------------------------------------------------------------------------------------------------------------------------------------------------------------------------------------------------------------------------------------------------------------------------------------------------------------|
| Participants             | 13*             | <b>P7</b> (a) Report numbers of individuals at each stage of study—eg numbers potentially eligible, examined for eligibility, confirmed eligible, included in the study, completing follow-up, and analysed<br>(b) Give reasons for non-participation at each stage<br>(c) Consider use of a flow diagram                                                                                                     |
| Descriptive data         | 14*             | <b>P7</b> (a) Give characteristics of study participants (eg demographic, clinical, social) and information on exposures and potential confounders<br>(b) Indicate number of participants with missing data for each variable of interest<br>(c) <i>Cohort study</i> —Summarise follow-up time (eg, average and total amount)                                                                                 |
| Outcome data             | 15*             | <i>Cohort study</i> —Report numbers of outcome events or summary measures over time<br><i>Case-control study</i> —Report numbers in each exposure category, or summary measures of exposure<br><b>P7</b> <i>Cross-sectional study</i> —Report numbers of outcome events or summary measures                                                                                                                   |
| Main results             | <b>P8</b> 16    | (a) Give unadjusted estimates and, if applicable, confounder-adjusted estimates and their precision (eg, 95% confidence interval). Make clear which confounders were adjusted for and why they were included<br>(b) Report category boundaries when continuous variables were categorized<br>(c) If relevant, consider translating estimates of relative risk into absolute risk for a meaningful time period |
| Other analyses           | 17              | Report other analyses done—eg analyses of subgroups and interactions, and sensitivity analyses                                                                                                                                                                                                                                                                                                                |
| <b>Discussion</b>        |                 |                                                                                                                                                                                                                                                                                                                                                                                                               |
| Key results              | <b>P11</b> 18   | Summarise key results with reference to study objectives                                                                                                                                                                                                                                                                                                                                                      |
| Limitations              | <b>P3,11</b> 19 | Discuss limitations of the study, taking into account sources of potential bias or imprecision. Discuss both direction and magnitude of any potential bias                                                                                                                                                                                                                                                    |
| Interpretation           | <b>P3</b> 20    | Give a cautious overall interpretation of results considering objectives, limitations, multiplicity of analyses, results from similar studies, and other relevant evidence                                                                                                                                                                                                                                    |
| Generalisability         | 21              | Discuss the generalisability (external validity) of the study results                                                                                                                                                                                                                                                                                                                                         |
| <b>Other information</b> |                 |                                                                                                                                                                                                                                                                                                                                                                                                               |
| Funding                  | <b>P11</b> 22   | Give the source of funding and the role of the funders for the present study and, if applicable, for the original study on which the present article is based                                                                                                                                                                                                                                                 |

\*Give information separately for cases and controls in case-control studies and, if applicable, for exposed and unexposed groups in cohort and cross-sectional studies.

**Note:** An Explanation and Elaboration article discusses each checklist item and gives methodological background and published examples of transparent reporting. The STROBE checklist is best used in conjunction with this article (freely available on the Web sites of PLoS Medicine at <http://www.plosmedicine.org/>, Annals of Internal Medicine at <http://www.annals.org/>, and Epidemiology at <http://www.epidem.com/>). Information on the STROBE Initiative is available at [www.strobe-statement.org](http://www.strobe-statement.org).

Zheng-jun LIU  
2018/02/09
